# Supplementary material for: Rare Glutamic Acid Methyl Ester Peptaibols from Sepedonium ampullosporum Damon KSH 534 Exhibit Promising Antifungal and Anticancer Activity
Source: MDPI journal article supplement (doi:10.3390/ijms222312718), 2021-11-24
Supplement: s1 [file s1]

# Rare glutamic acid methyl ester peptaibols from *Sepedonium ampullosporum* Damon KSH 534 exhibit promising anticancer activity

Yen T. H. Lam <sup>1,2</sup>, Manuel G. Ricardo <sup>1,3</sup>, Robert Rennert <sup>1</sup>, Andrej Frolov <sup>1,4</sup>, Andrea Porzel <sup>1</sup>, Wolfgang Brandt <sup>1</sup>, Pauline Stark <sup>1</sup>, Bernhard Westermann <sup>1</sup> and Norbert Arnold <sup>1,\*</sup>

<sup>1</sup> Department of Bioorganic Chemistry, Leibniz Institute of Plant Biochemistry, Weinberg 3, D-06120 Halle (Saale), Germany; ThiHaiYen.Lam@ipb-halle.de (Y.T.H.L.); Robert.Rennert@ipb-halle.de (R.R.); Andrej.Frolov@ipb-halle.de (A.F.); Andrea.Porzel@ipb-halle.de (A.P.); Wolfgang.Brandt@ipb-halle.de (W.B.); Pauline.Stark@ipb-halle.de (P.S.); Bernhard.Westermann@ipb-halle.de (B.W.); Norbert.Arnold@ipb-halle.de (N.A.)

<sup>2</sup> Department of Organic Chemistry, Faculty of Chemistry, Hanoi National University of Education, 136 Xuanthuy, Cau Giay, Hanoi, Vietnam;

<sup>3</sup> Department of Biomolecular Systems, Max Planck Institute of Colloids and Interfaces, Am Mühlenberg 1, D-14476 Potsdam, Germany; Manuel.GarciaRicardo@mpikg.mpg.de (M.G.R.)

<sup>4</sup> Department of Biochemistry, Faculty of Biology, St. Petersburg State University, Sredny Prospekt V.O. 41, 199004, St. Petersburg, Russian Federation;

\* Correspondence: Norbert.Arnold@ipb-halle.de; Tel.: +49-345-5582-1310

## Supplementary Materials

## Table of contents

- Spectral data of natural ampullosporins F (1) and G (2) ..... Figure S1-S16
- Spectral data of synthetic ampullosporins F (1) and G (2) ..... Figure S17-S22
- Spectroscopic comparison of natural and synthetic ampullosporins F (1) and G (2) ..... Figure S23-S28
- Spectral data of natural peptides 3-7..... Figure S29-S40
- Antiphytopathogenic activity of ampullosporin F (1), G (2), and A (3) ..... Figure S41
- Docking arrangement of ampullosporin G (2) on protein databank entry 6IRA ..... Figure S42
- LC-HRMS spectrum of the enriched fraction from ethanol extract of *S. ampullosporum* strain KSH 534 ..... Figure S43
- ESI-HRMS<sup>n</sup> data of 1 – 5 ..... Table S1-S2

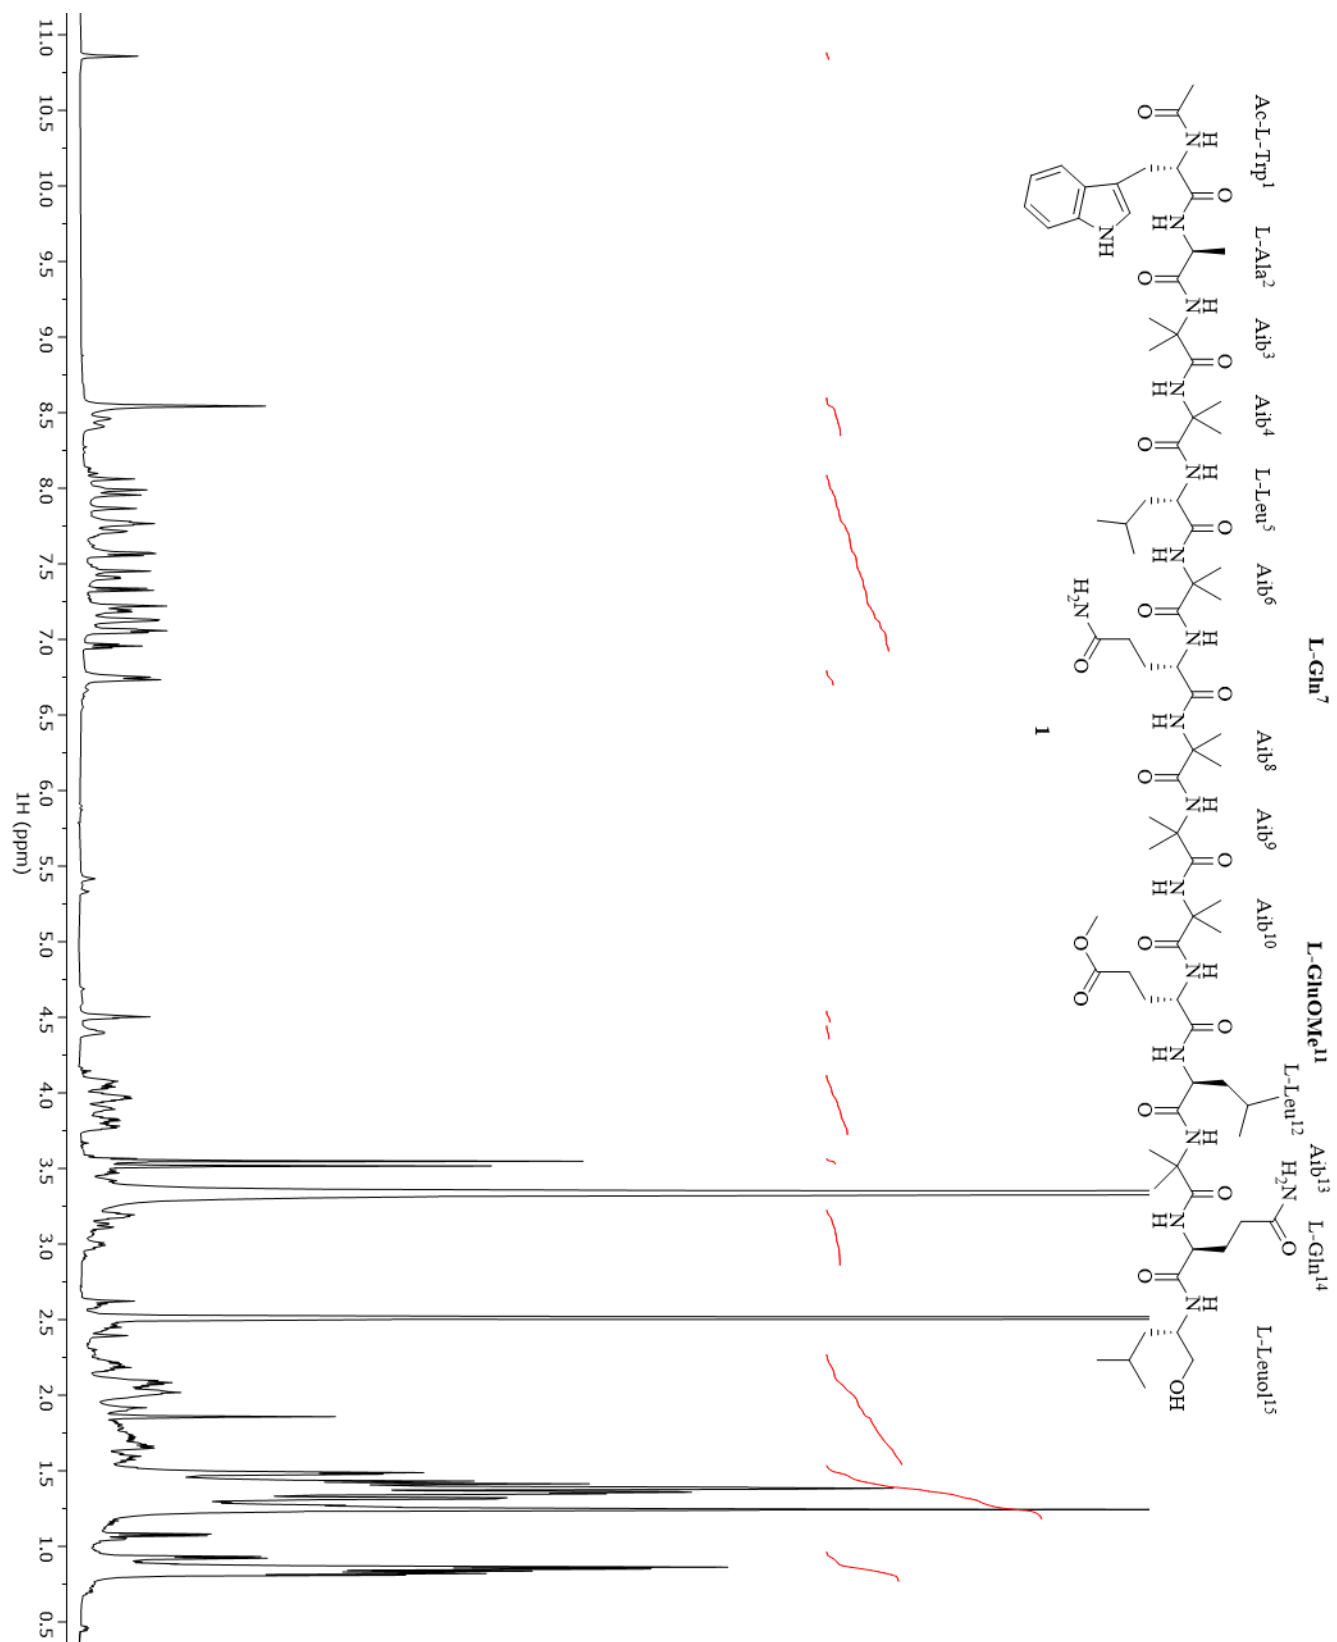

**Figure S1.** <sup>1</sup>H NMR spectrum of natural ampullosporin F (**1**) (600 MHz, DMSO-*d*<sub>6</sub>).

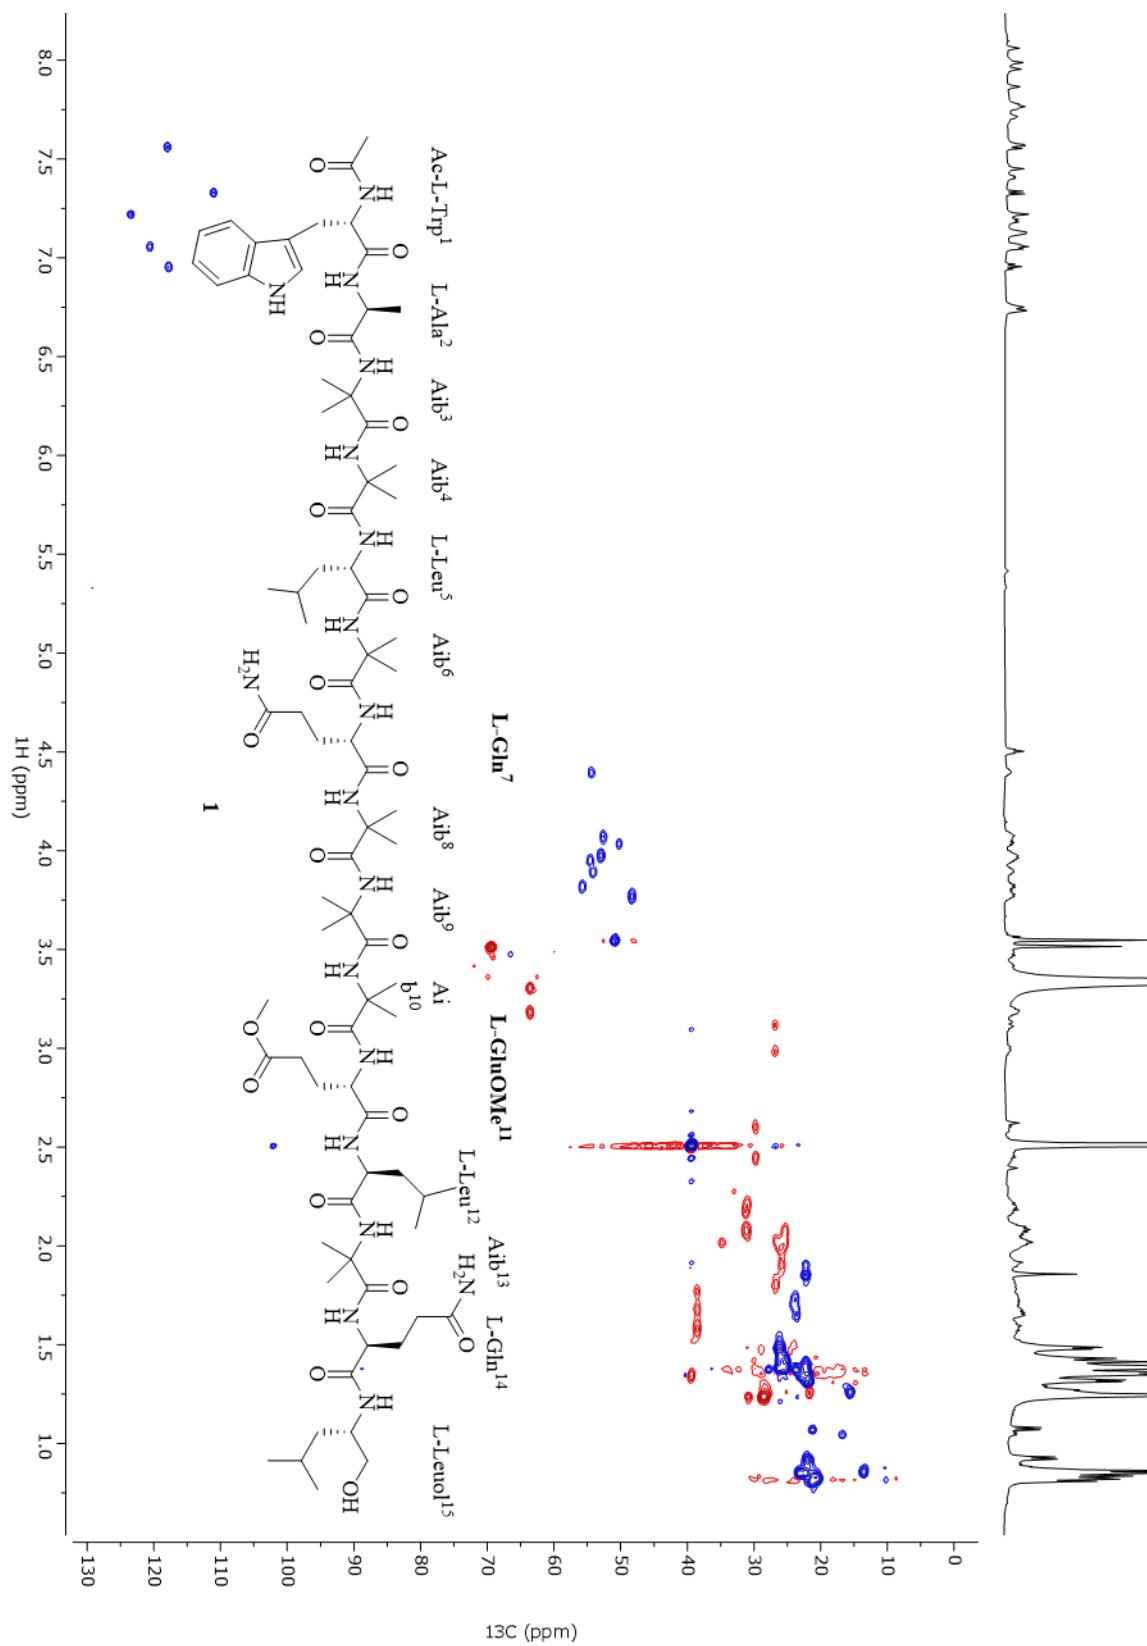

**Figure S2.**  $^1\text{H}$ ,  $^{13}\text{C}$  HSQC spectrum of natural ampullosporin F (**1**) (600 MHz,  $\text{DMSO}-d_6$ ).

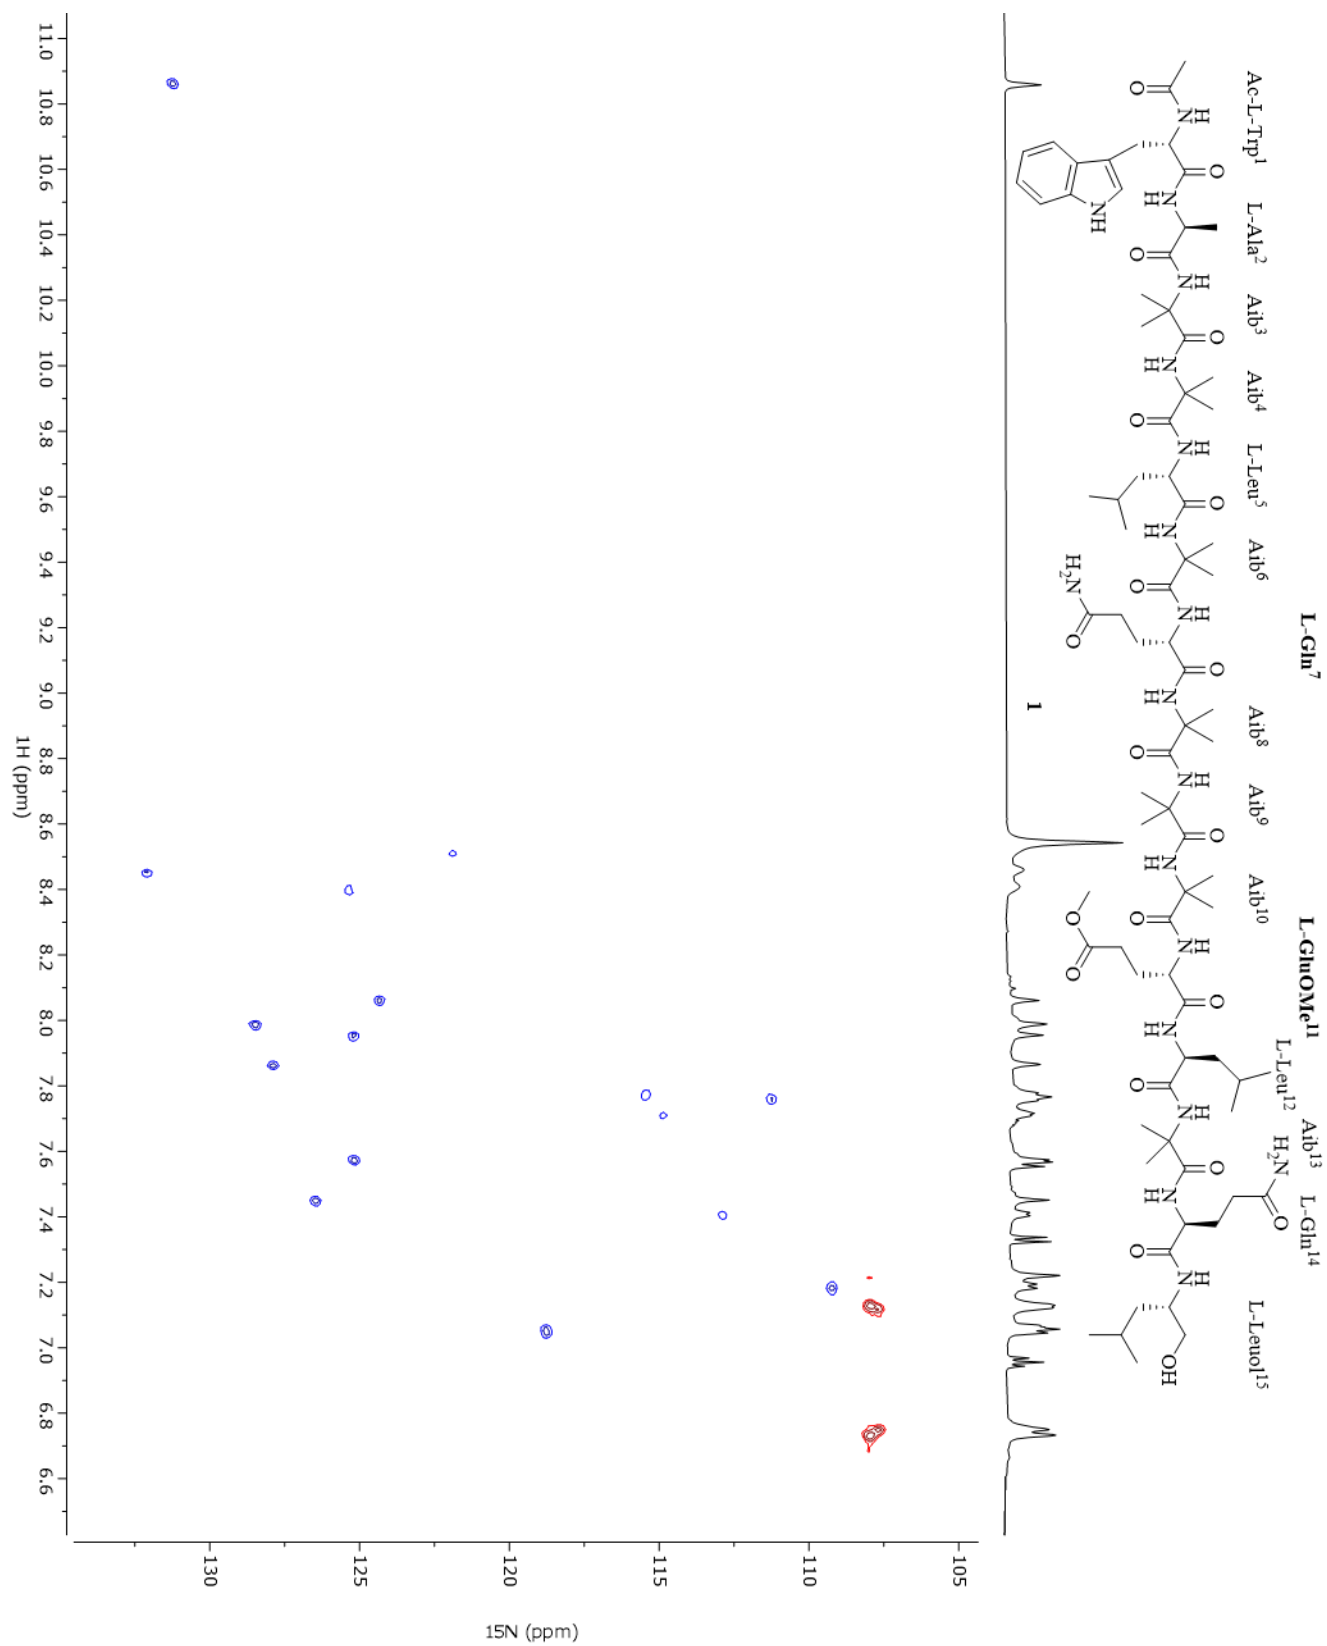

**Figure S3.**  $^1\text{H}$ ,  $^{15}\text{N}$  HSQC spectrum of natural ampullosporin F (1) (600 MHz,  $\text{DMSO}-d_6$ ).

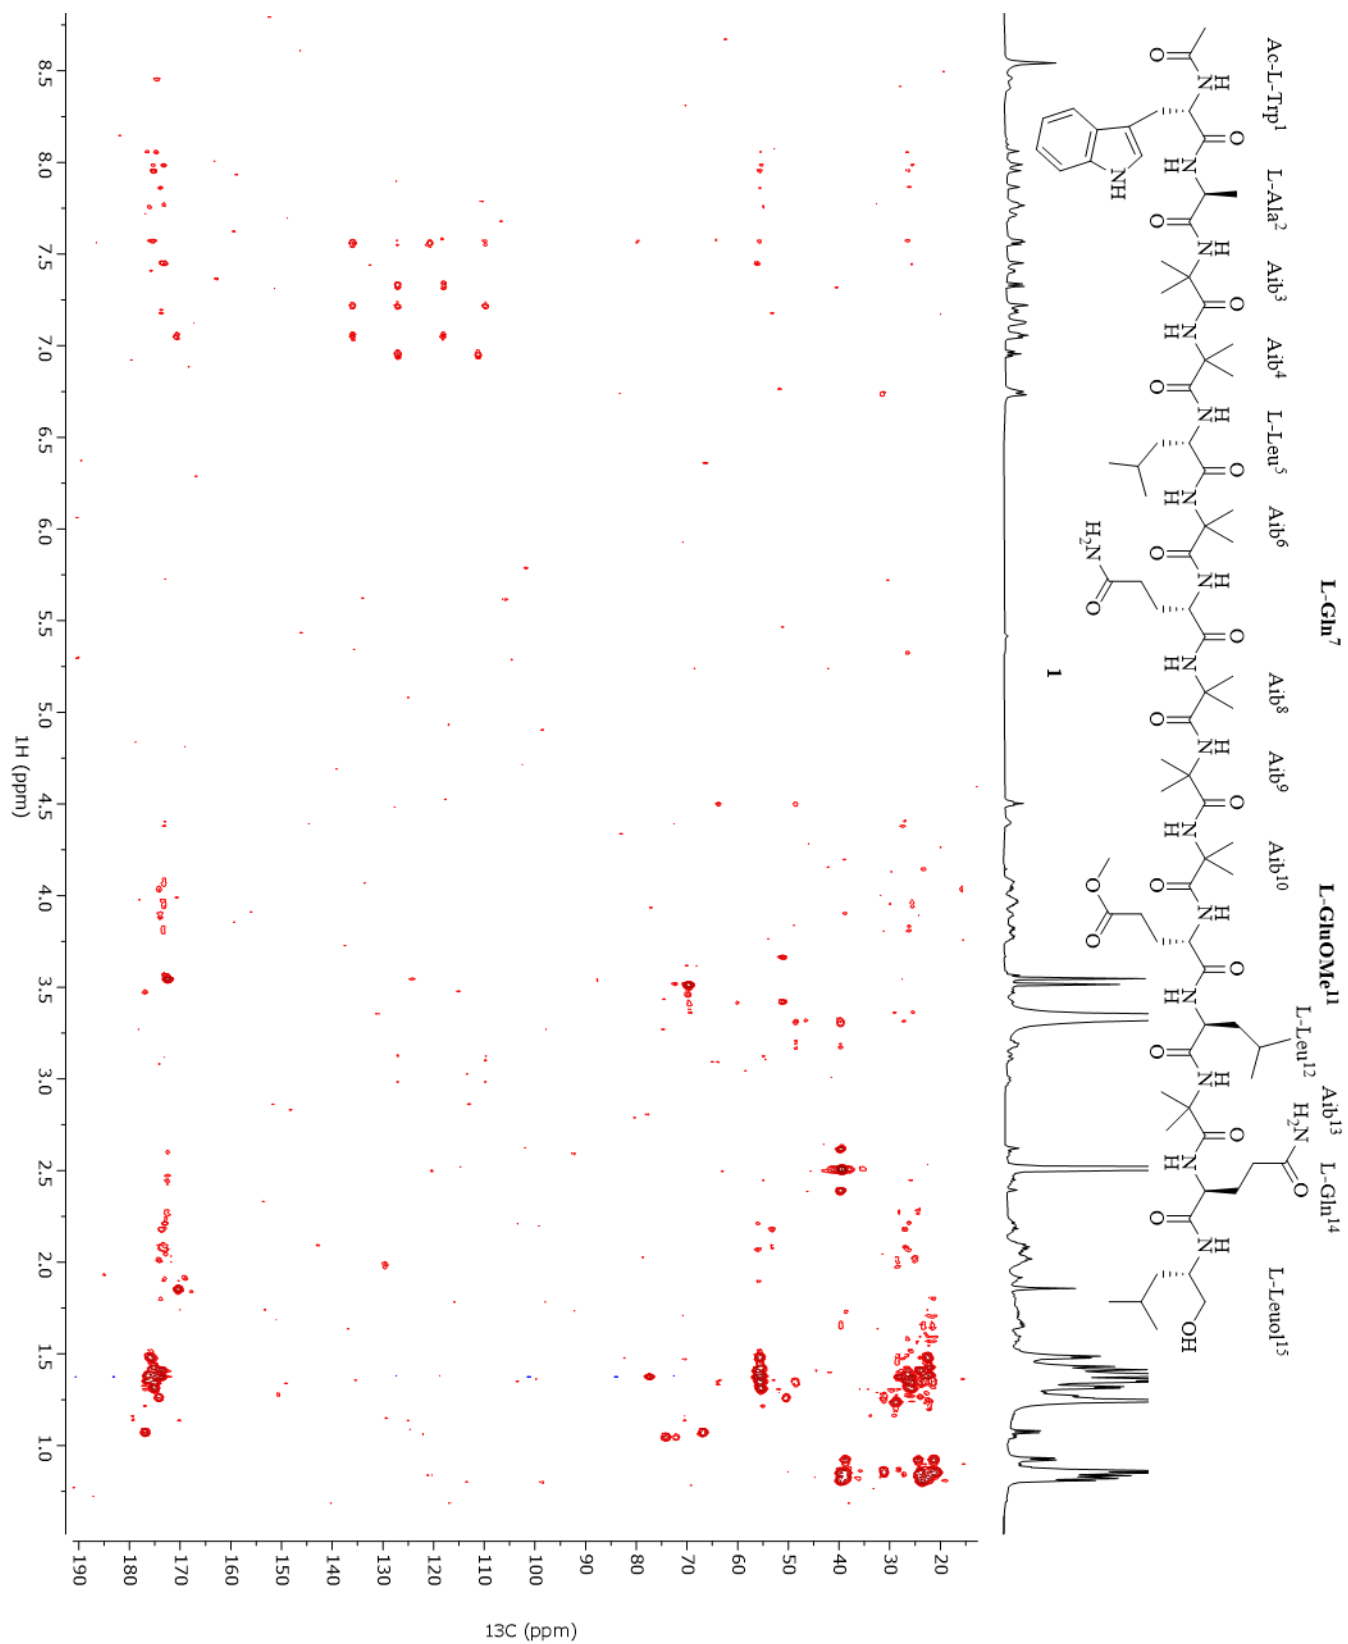

**Figure S4.**  $^1\text{H}$ ,  $^{13}\text{C}$  HMBC spectrum of natural ampuosporin F (1) (600 MHz,  $\text{DMSO}-d_6$ ).

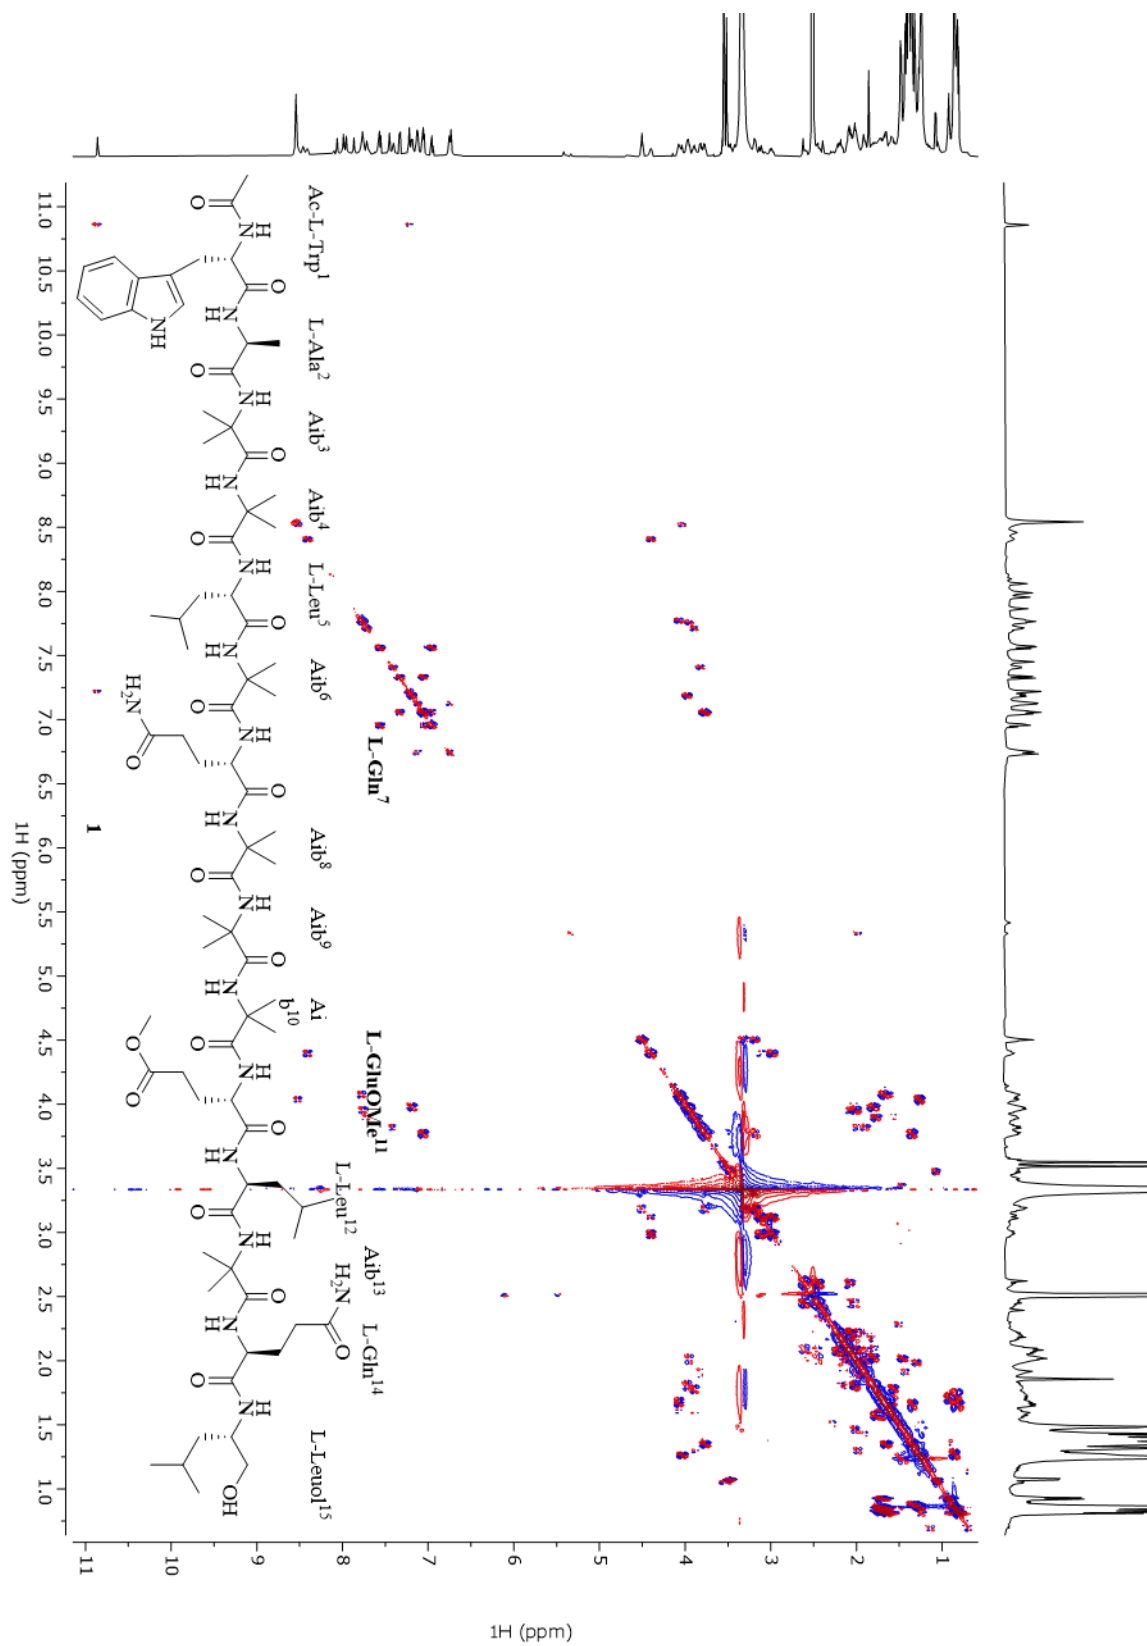

**Figure S5.**  $^1\text{H}$ ,  $^1\text{H}$  COSY spectrum of natural ampullosporin F (**1**) (600 MHz,  $\text{DMSO}-d_6$ ).

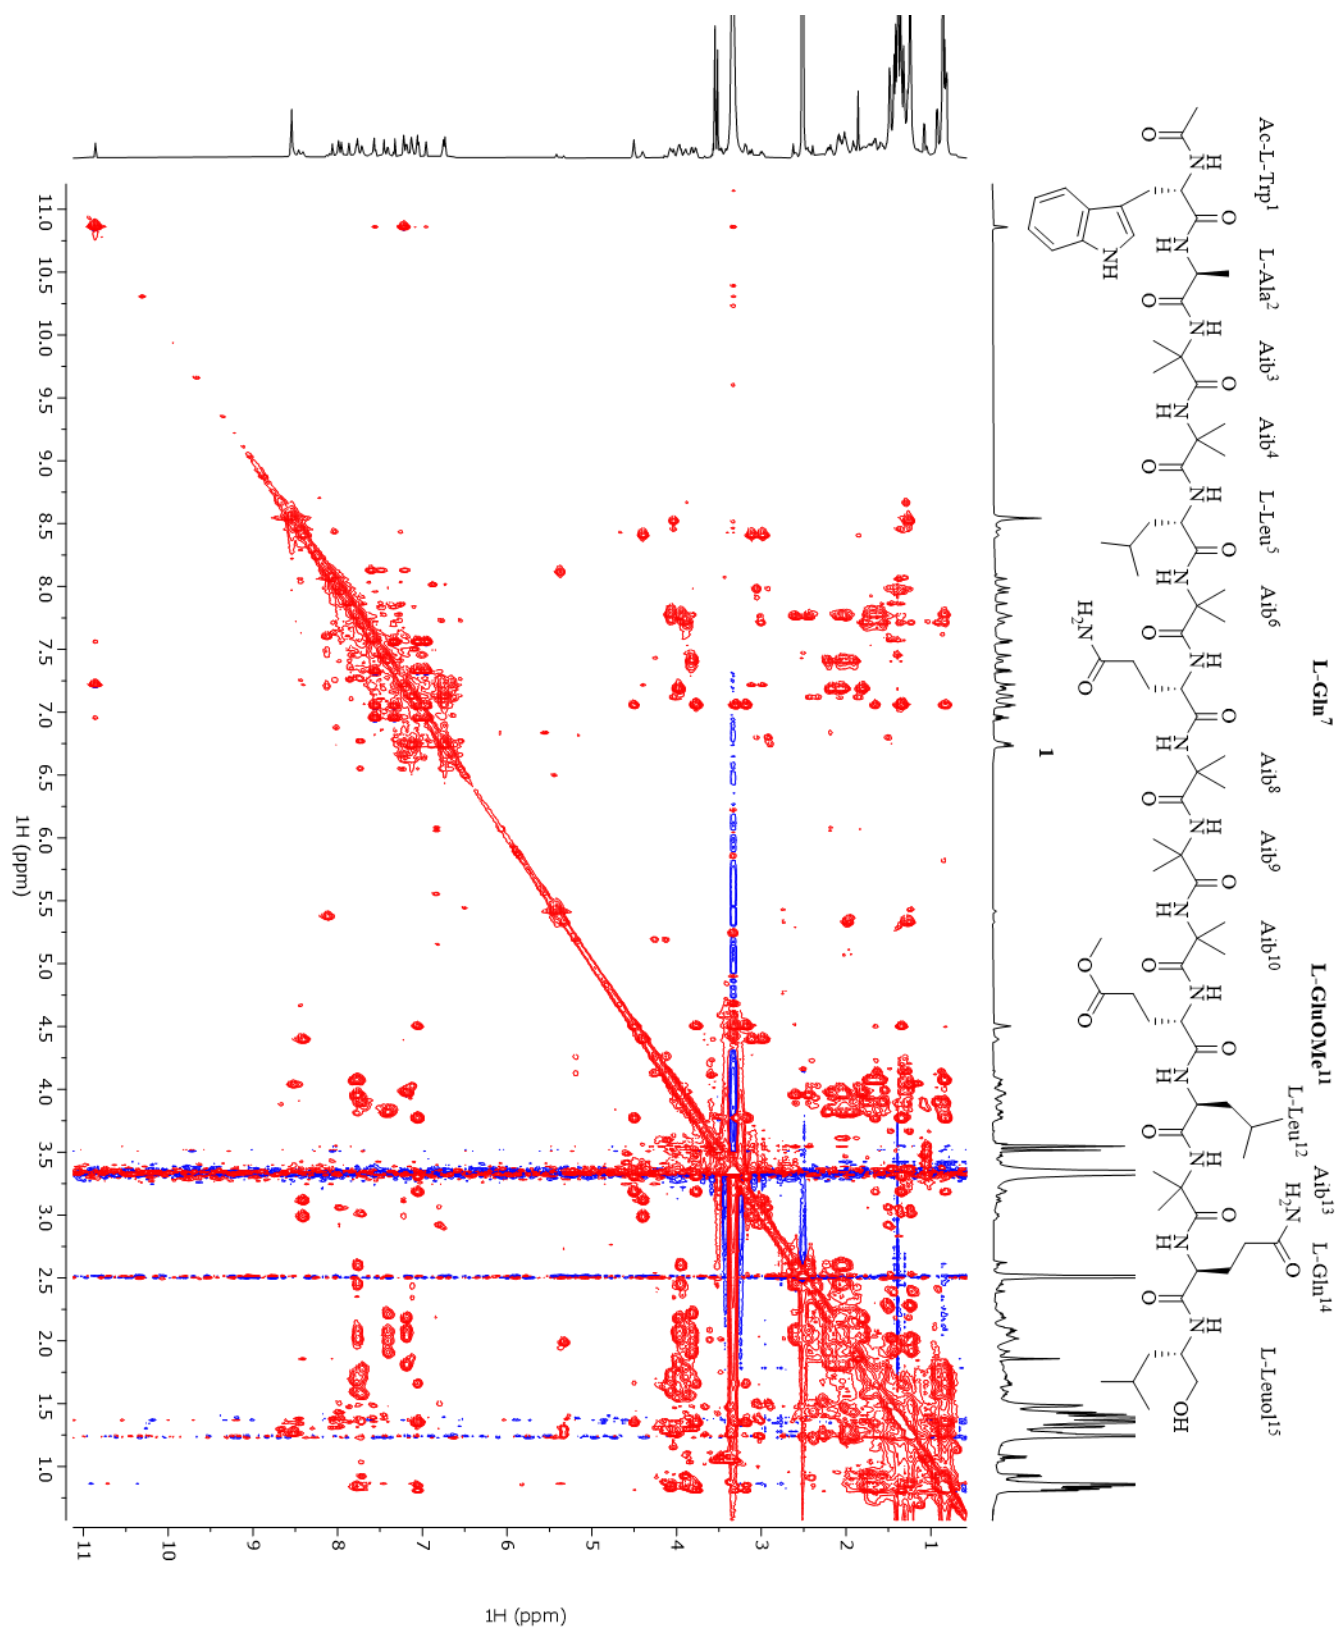

**Figure S6.** <sup>1</sup>H, <sup>1</sup>H TOCSY spectrum of natural ampullosporin F (1) (600 MHz, DMSO-*d*<sub>6</sub>).



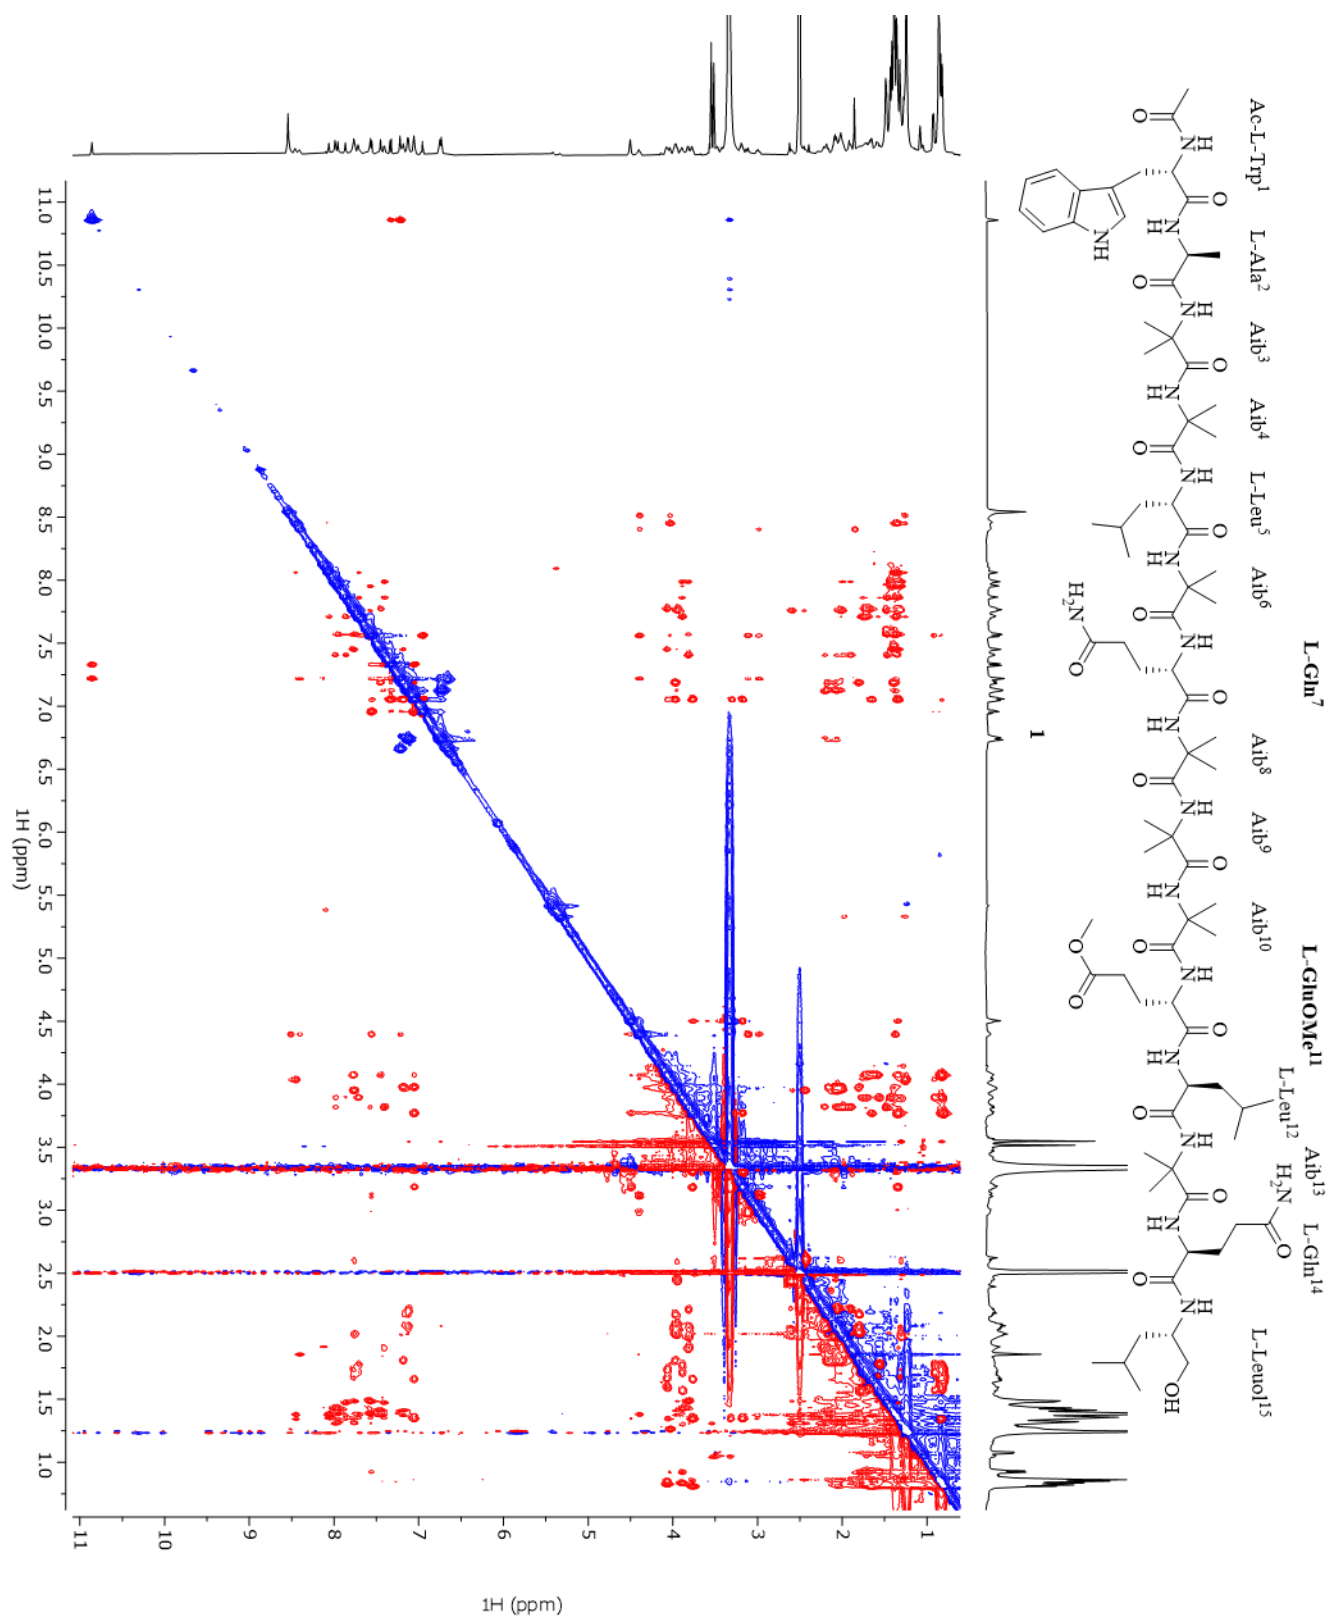

**Figure S7.** <sup>1</sup>H, <sup>1</sup>H ROESY spectrum of natural ampullosporin F (**1**) (600 MHz, DMSO-*d*<sub>6</sub>).

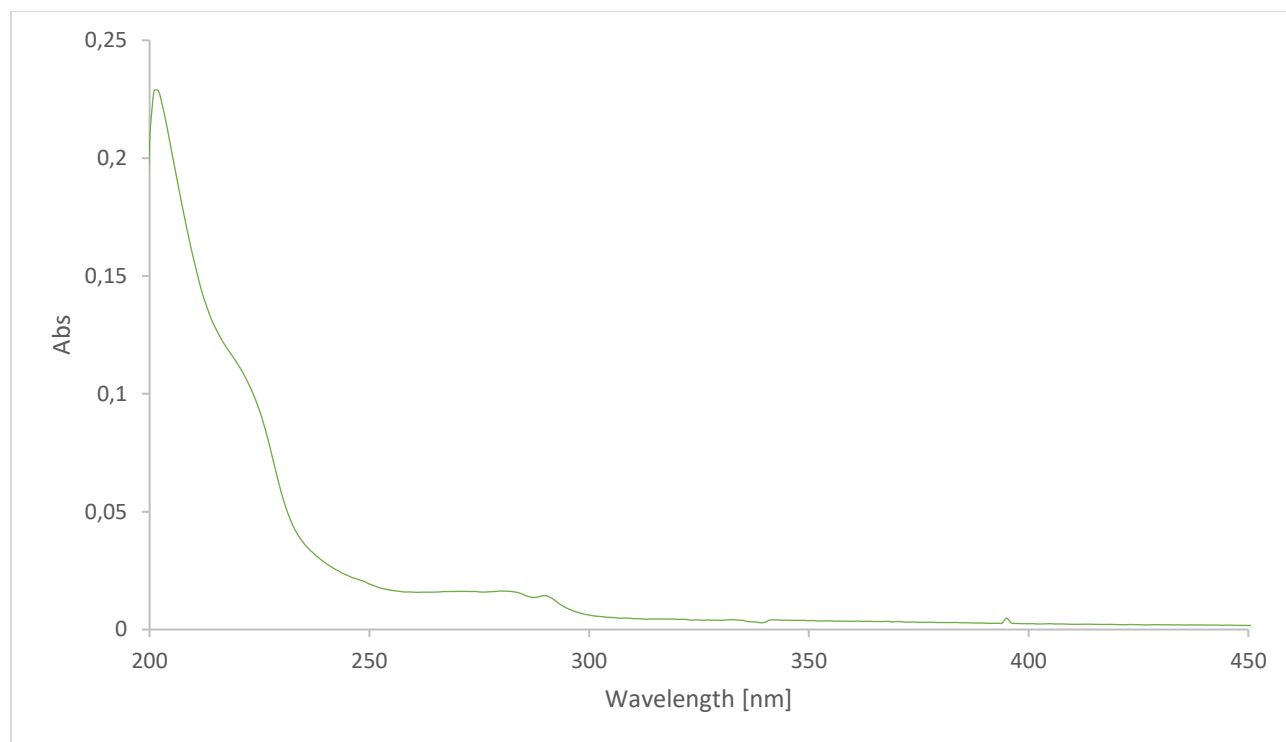

**Figure S8.** UV spectrum of natural ampullosporin F (**1**) in MeOH.

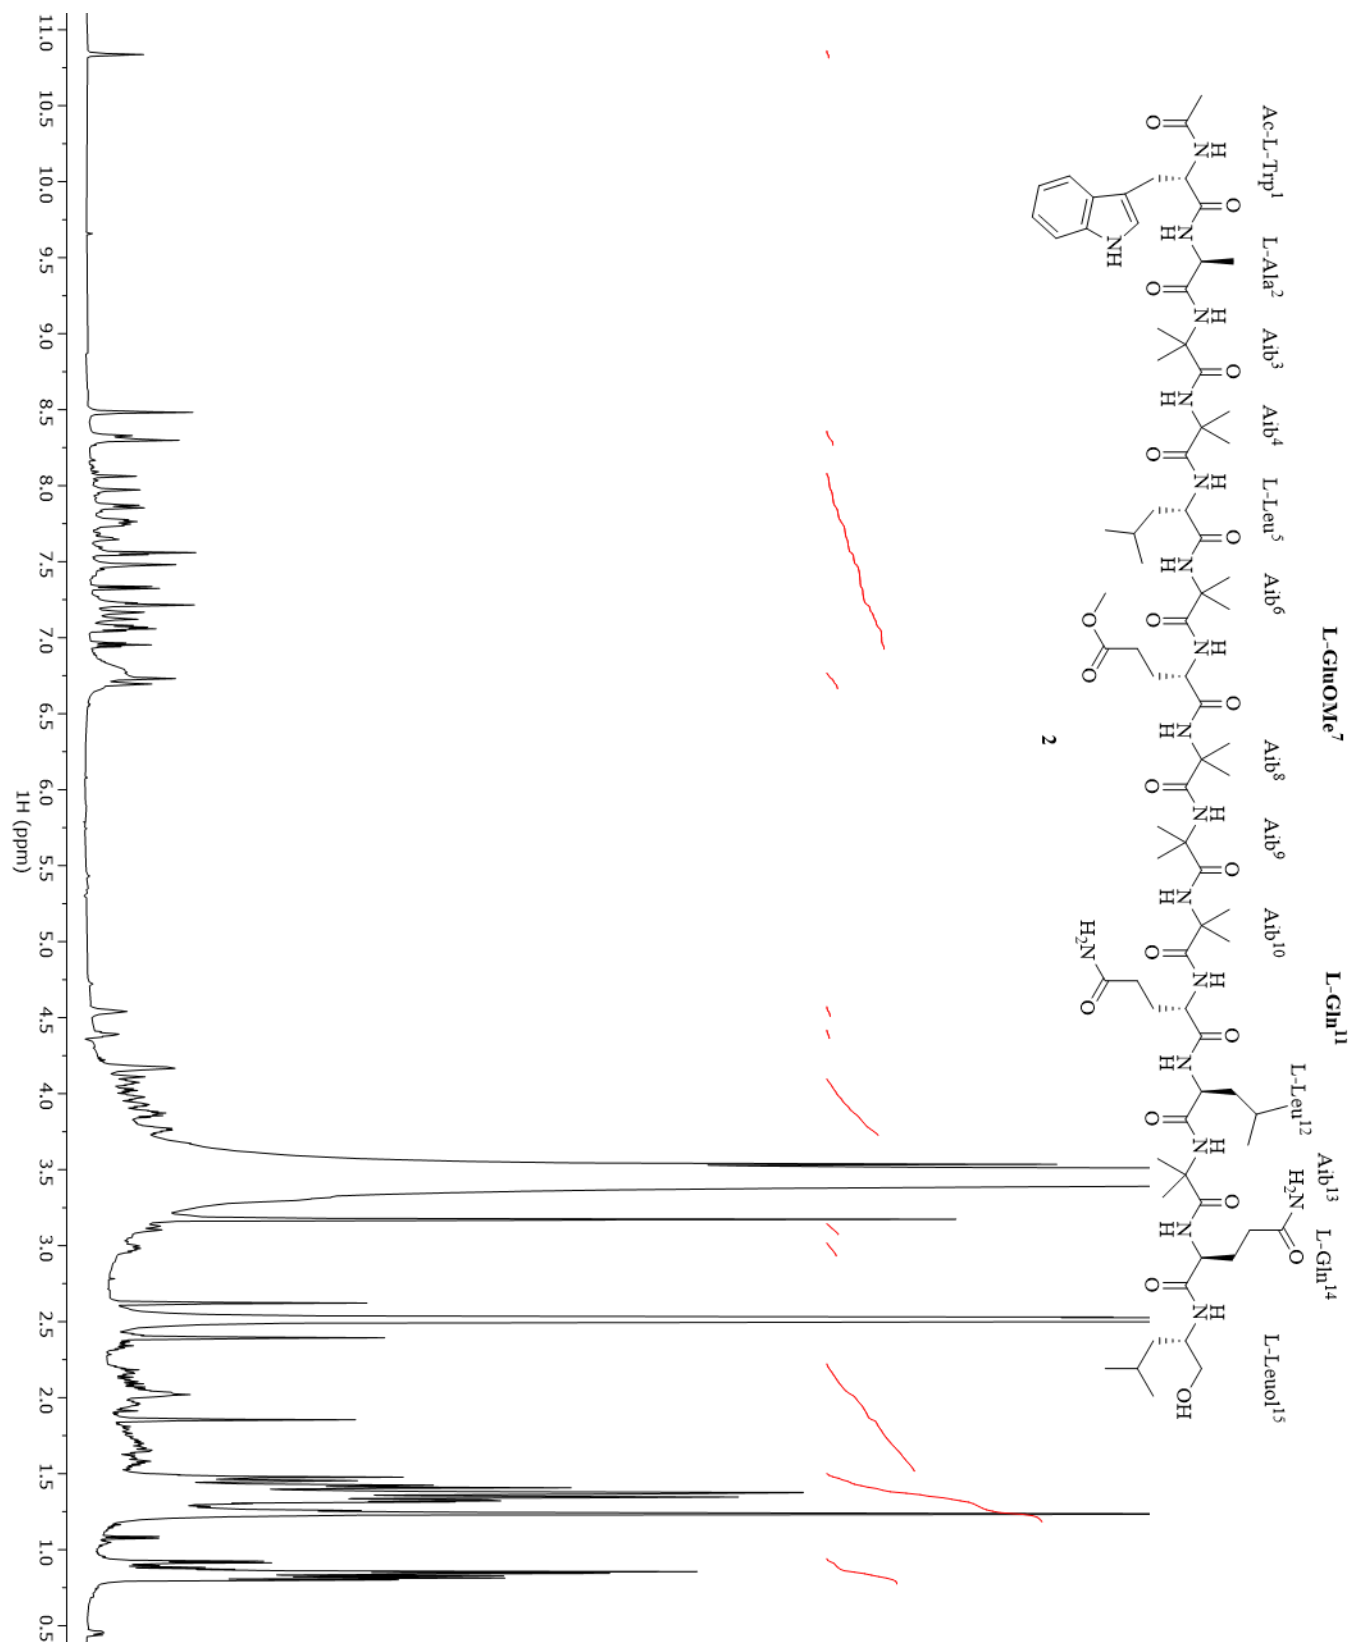

**Figure S9.**  $^1\text{H}$  NMR spectrum of natural ampullosporin G (**2**) (600 MHz,  $\text{DMSO}-d_6$ ).

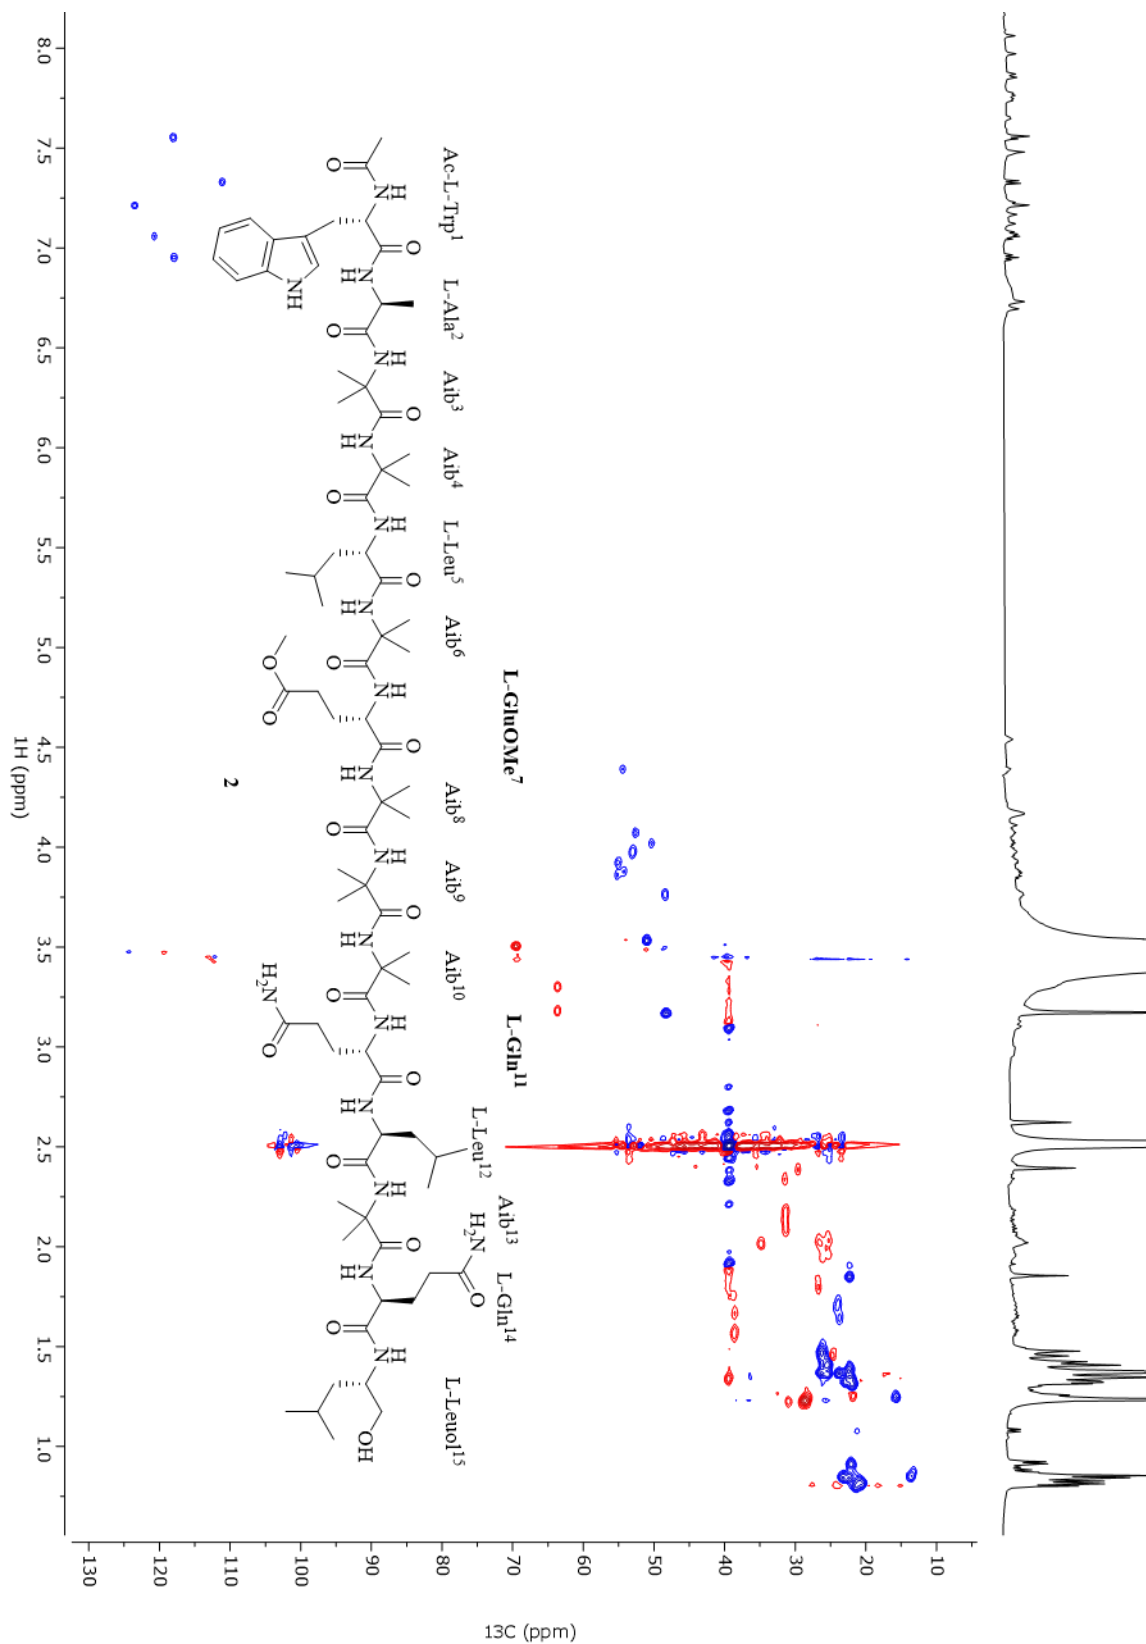

**Figure S10.**  $^1\text{H}$ ,  $^{13}\text{C}$  HSQC spectrum of natural ampuლოსporin G (2) (600 MHz, DMSO- $d_6$ ).

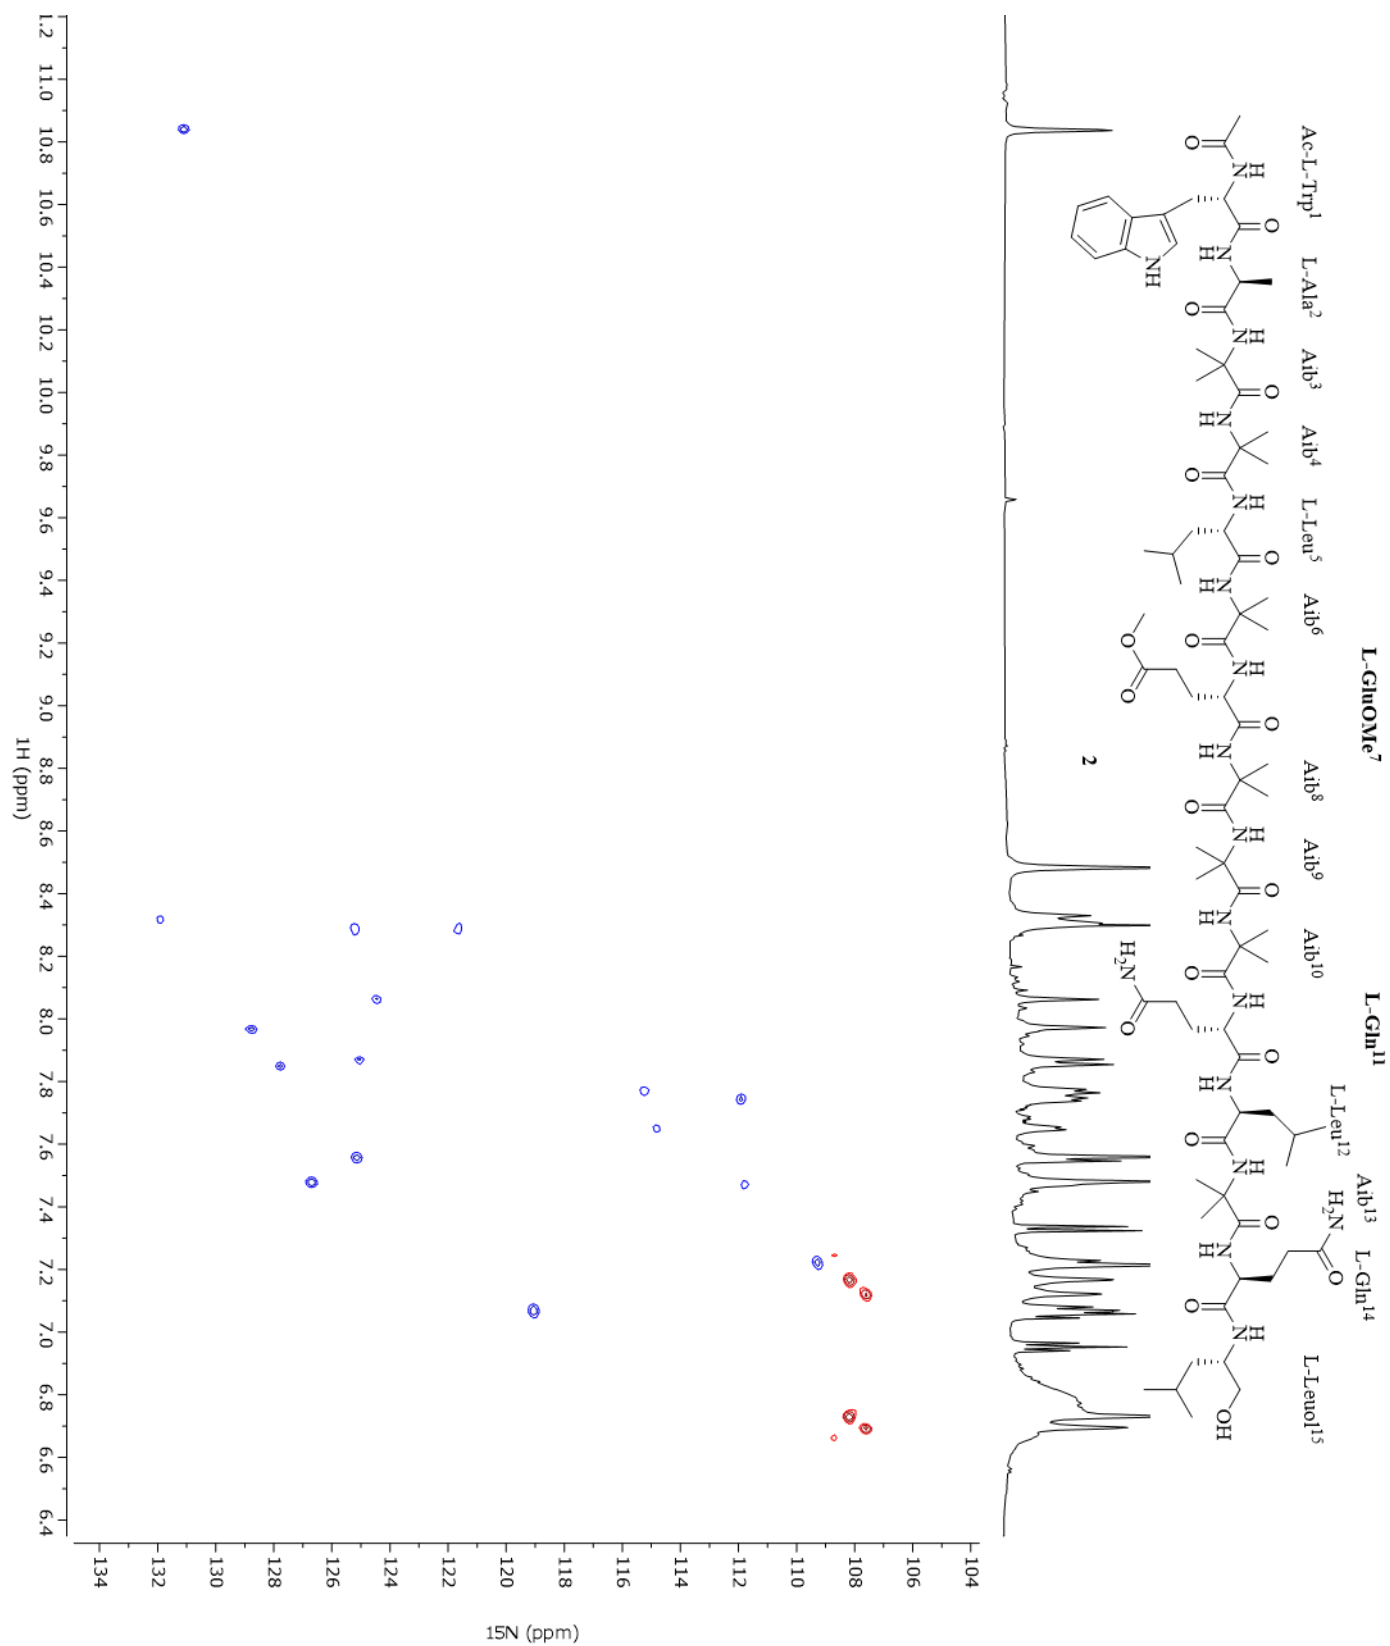

**Figure S11.**  $^1\text{H}$ ,  $^{15}\text{N}$  HSQC spectrum of natural ampullosporin G (**2**) (600 MHz,  $\text{DMSO}-d_6$ ).

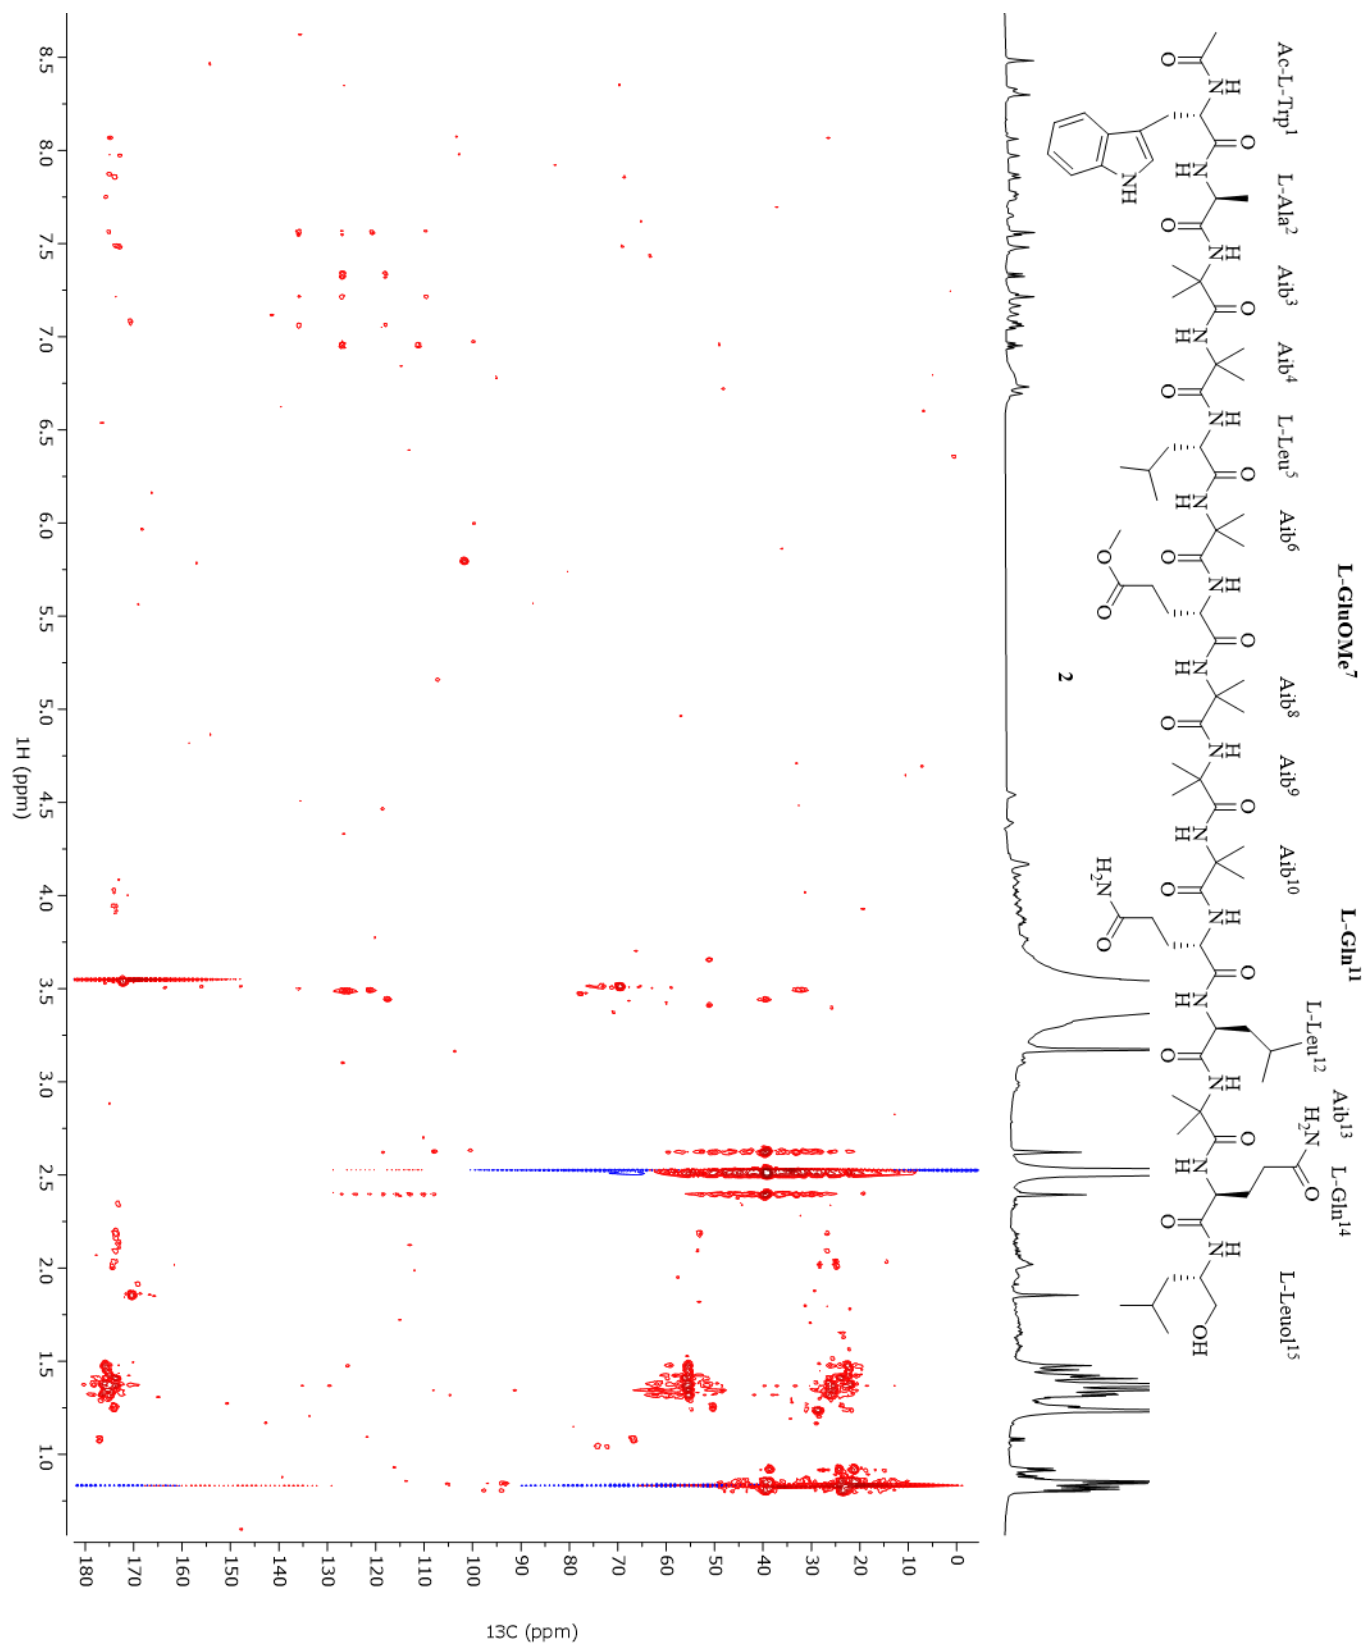

**Figure S12.**  $^1\text{H}$ ,  $^{13}\text{C}$  HMBC spectrum of natural ampullosporin G (2) (600 MHz,  $\text{DMSO}-d_6$ ).

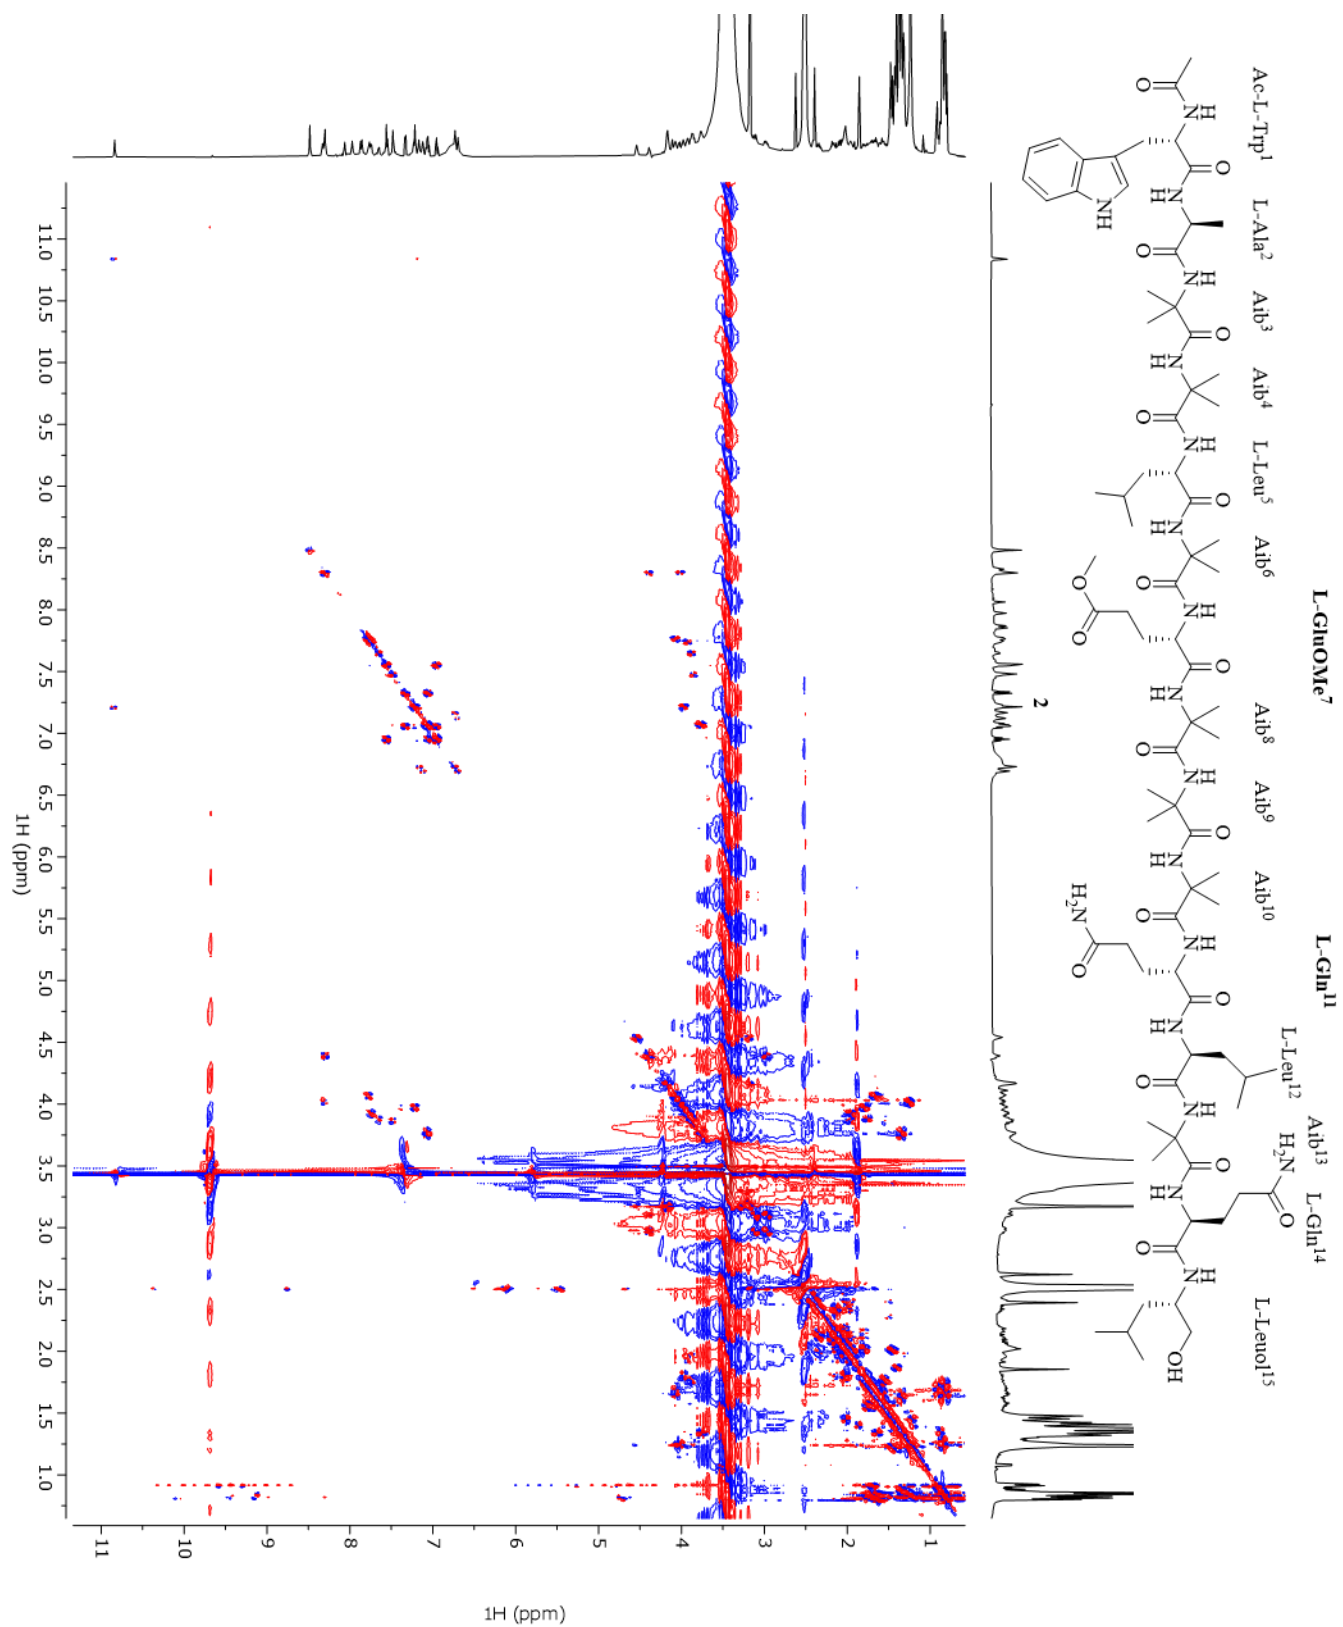

**Figure S13.**  $^1\text{H}$ ,  $^1\text{H}$  COSY spectrum of natural ampullosporin G (**2**) (600 MHz,  $\text{DMSO}-d_6$ ).

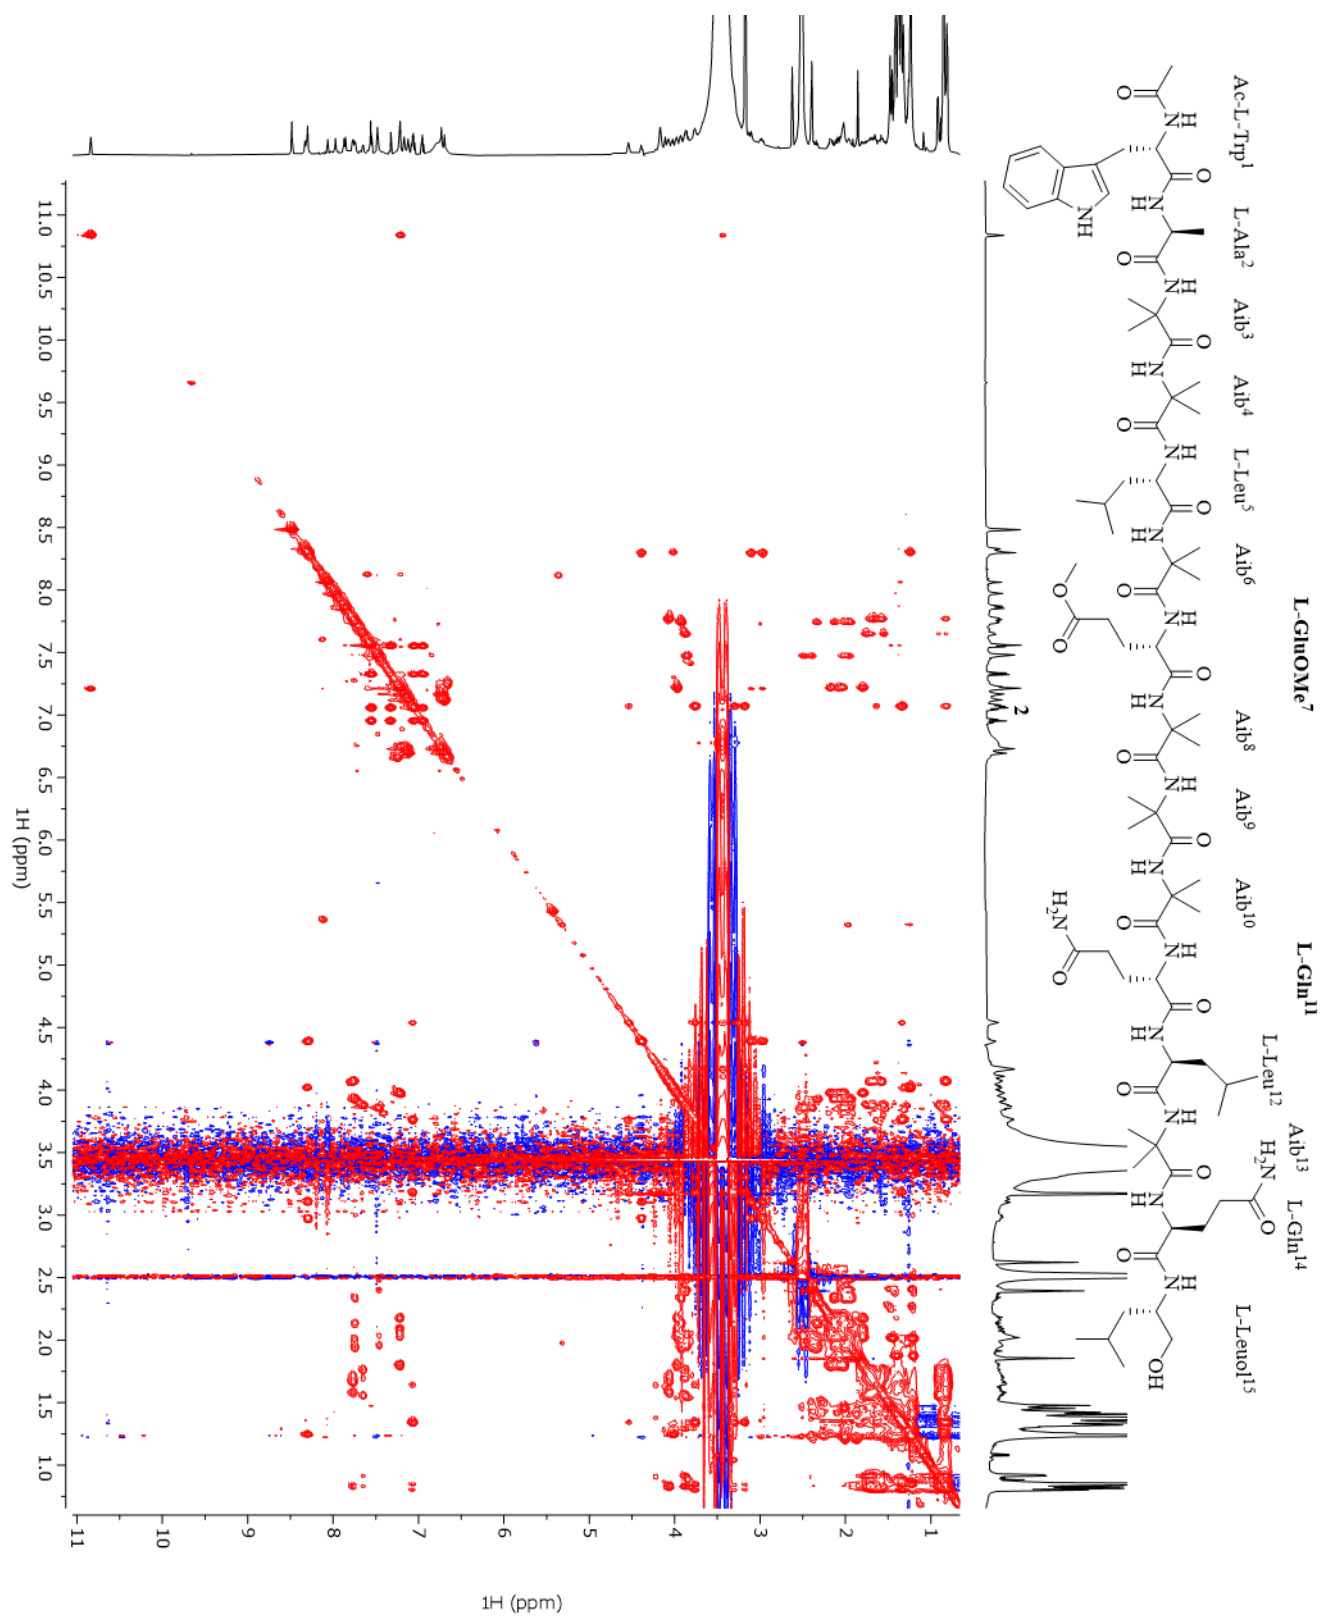

**Figure S14.** <sup>1</sup>H, <sup>1</sup>H TOCSY spectrum of natural ampullosporin G (2) (600 MHz, DMSO-*d*<sub>6</sub>).



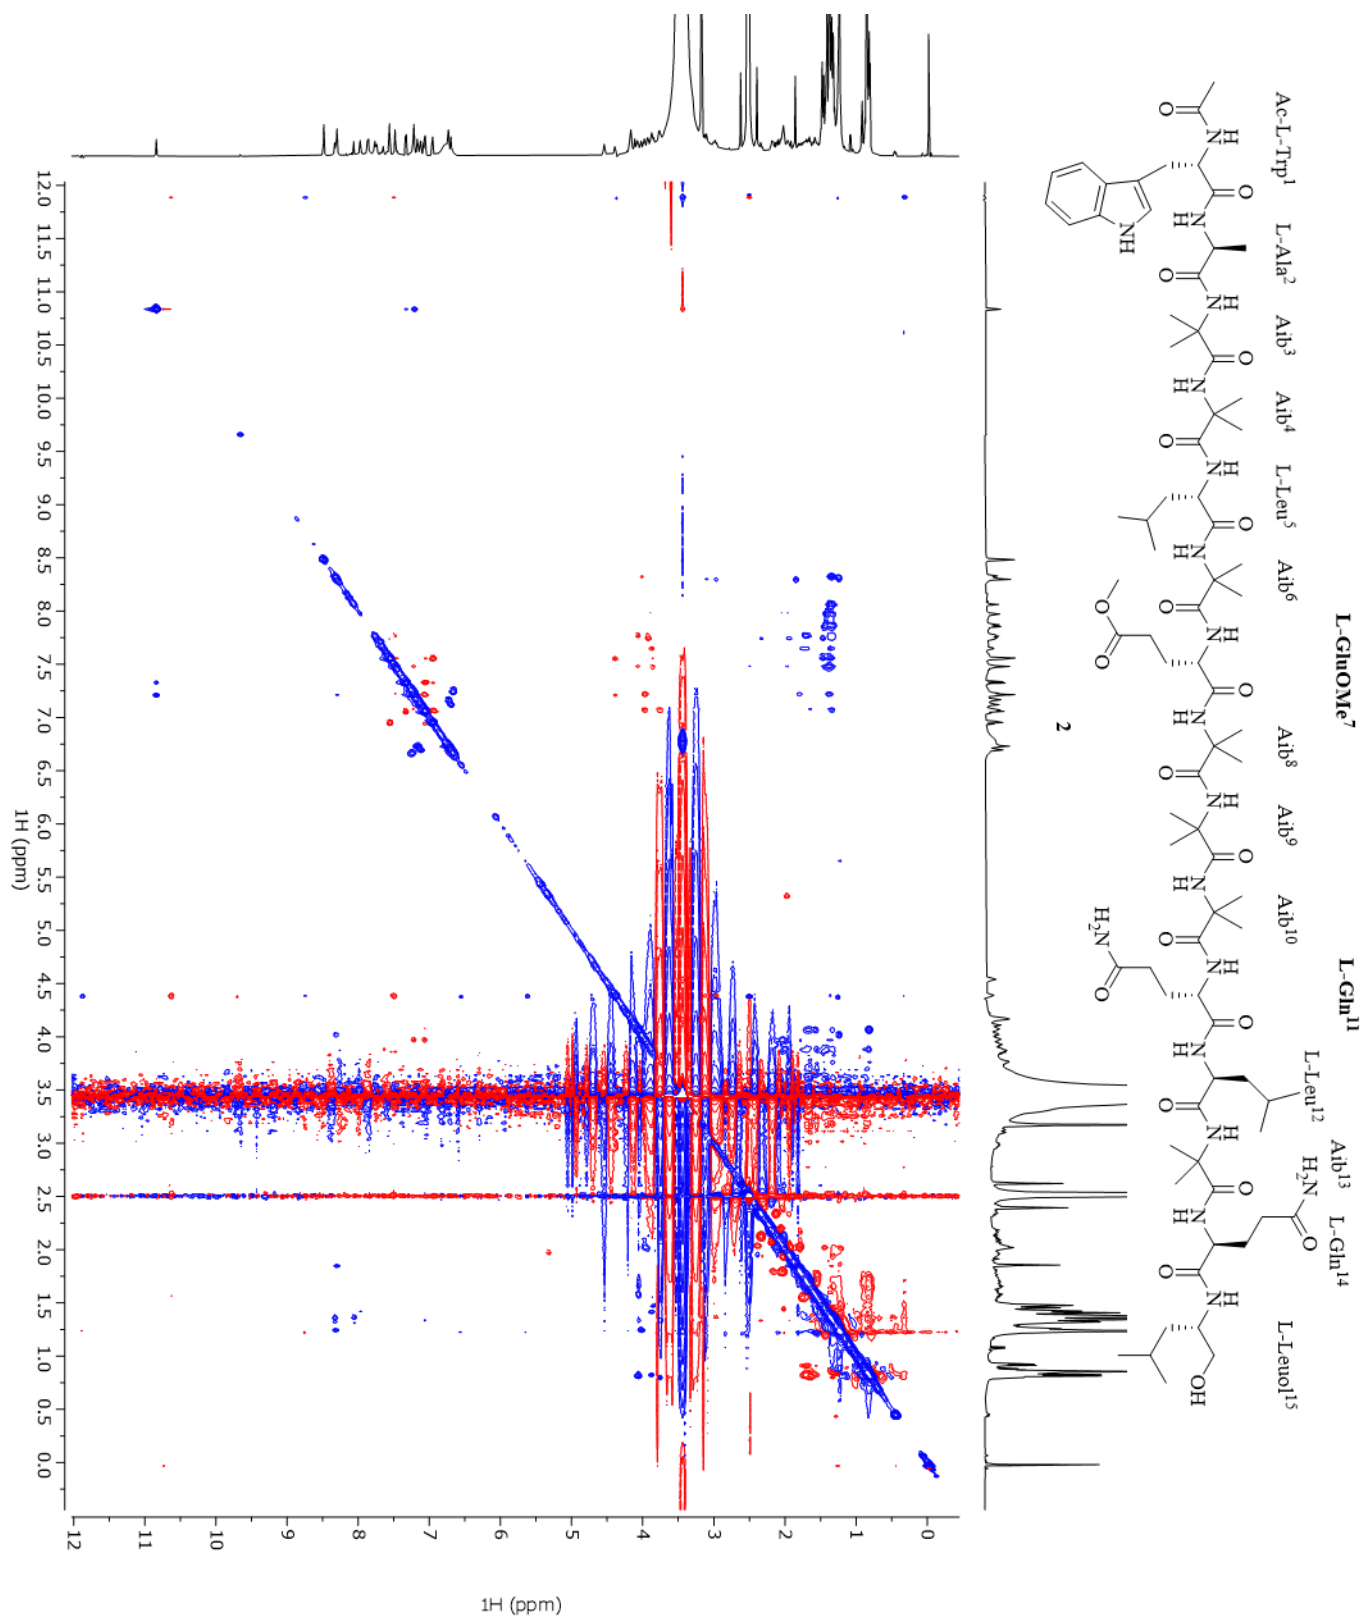

**Figure S15.**  $^1\text{H}$ ,  $^1\text{H}$  ROESY spectrum of natural ampullosporin G (2) (600 MHz, DMSO- $d_6$ ).

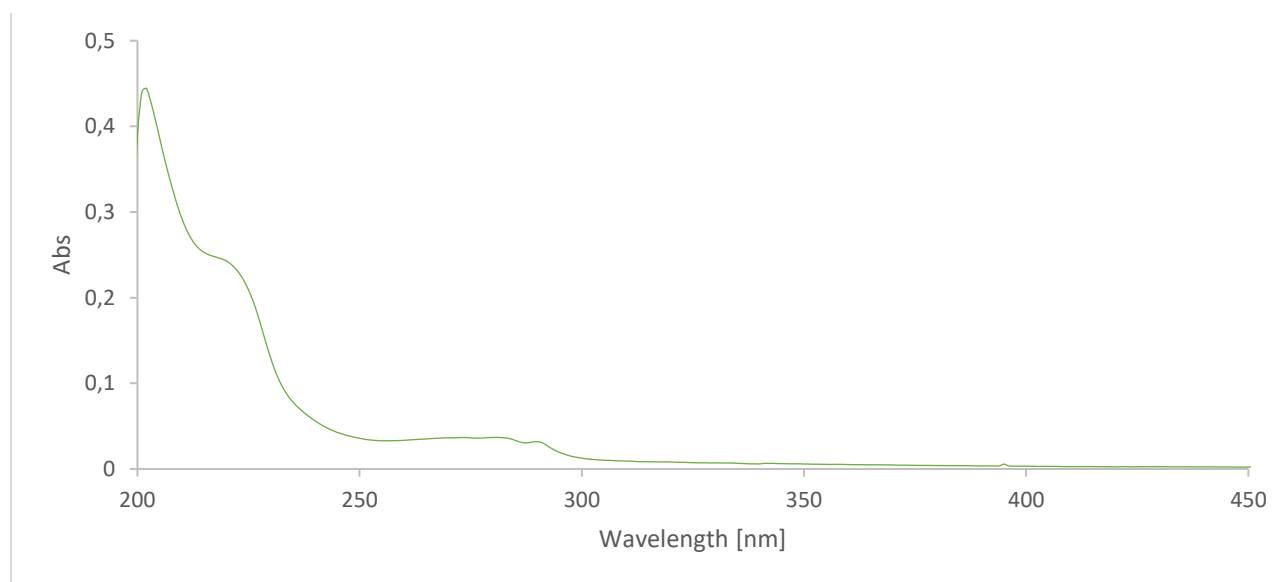

**Figure S16.** UV spectrum of natural ampullosporin G (**2**) in MeOH.

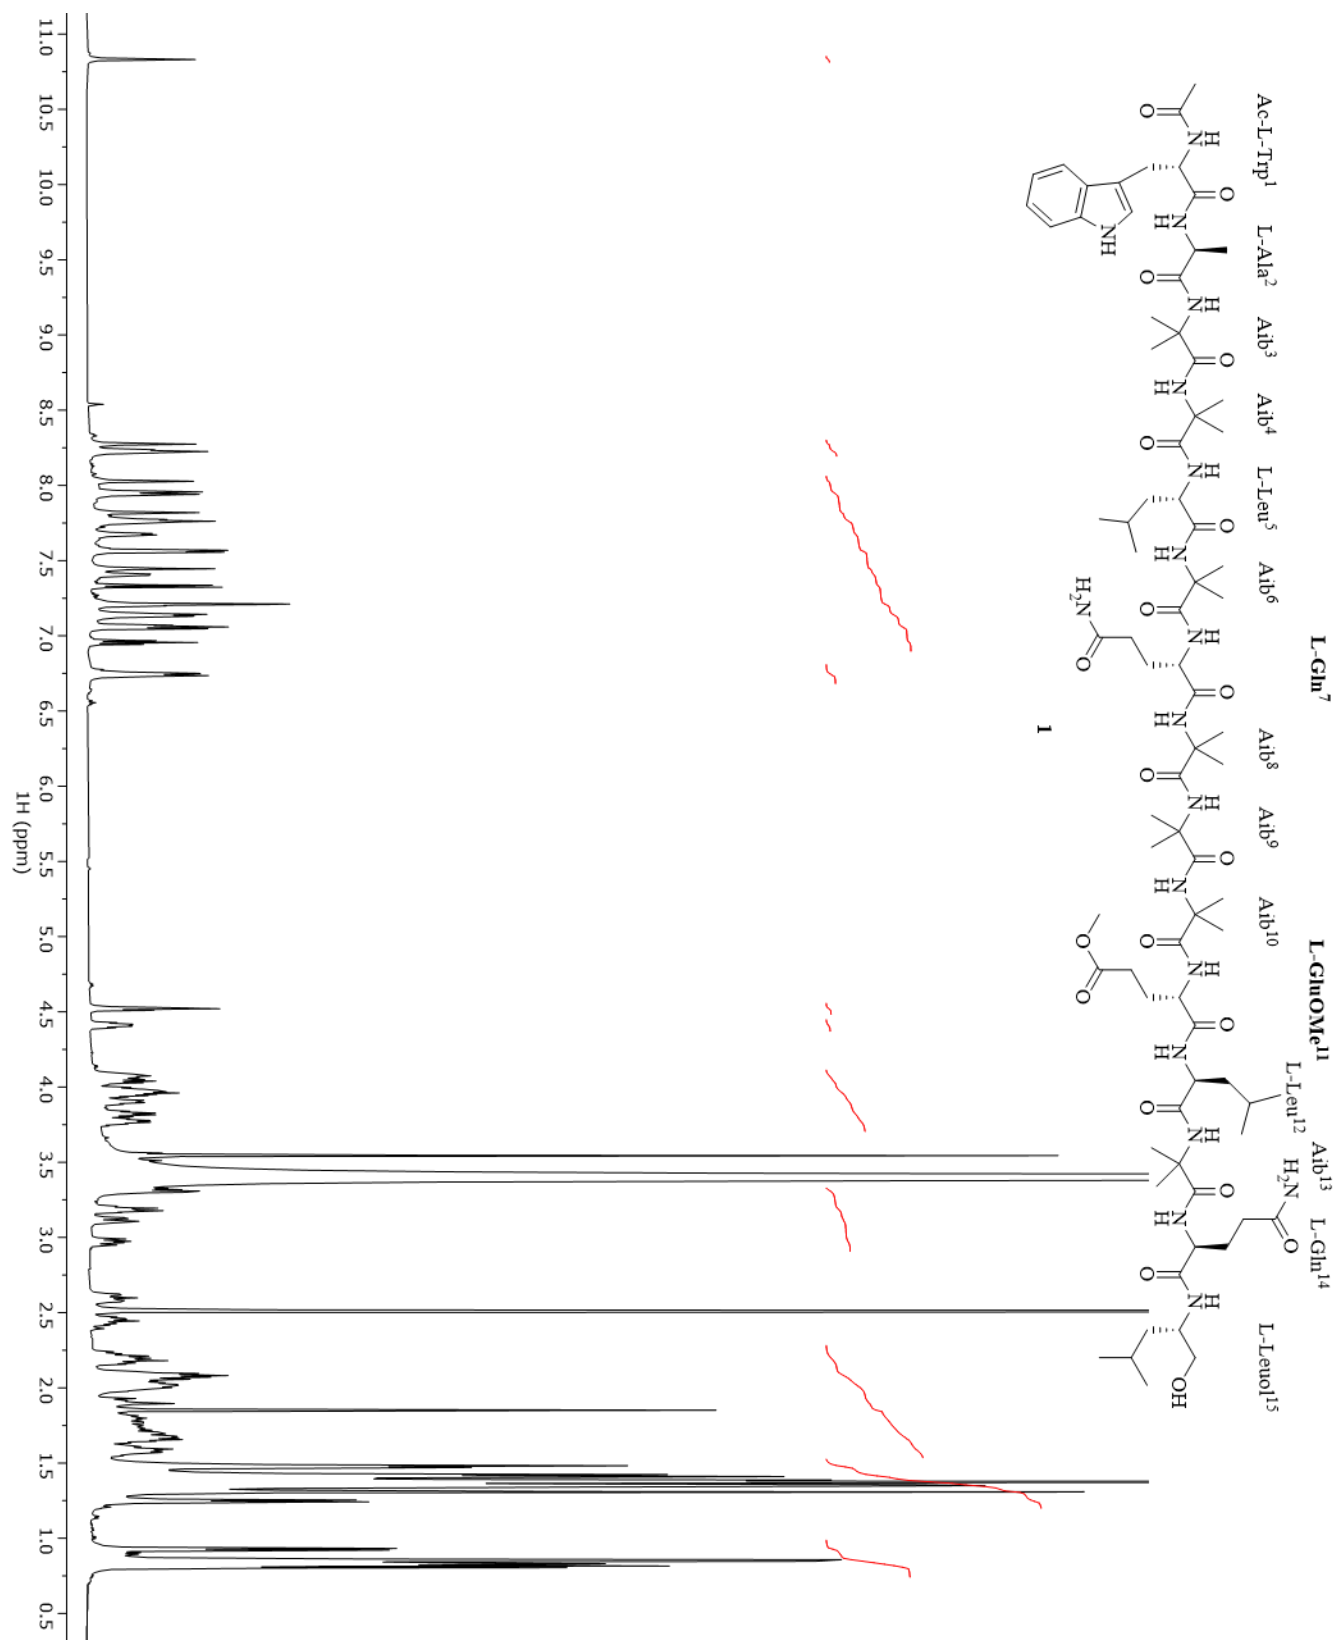

**Figure S17.** <sup>1</sup>H NMR spectrum of synthetic ampullosporin F (**1**) (600 MHz, DMSO-*d*<sub>6</sub>).

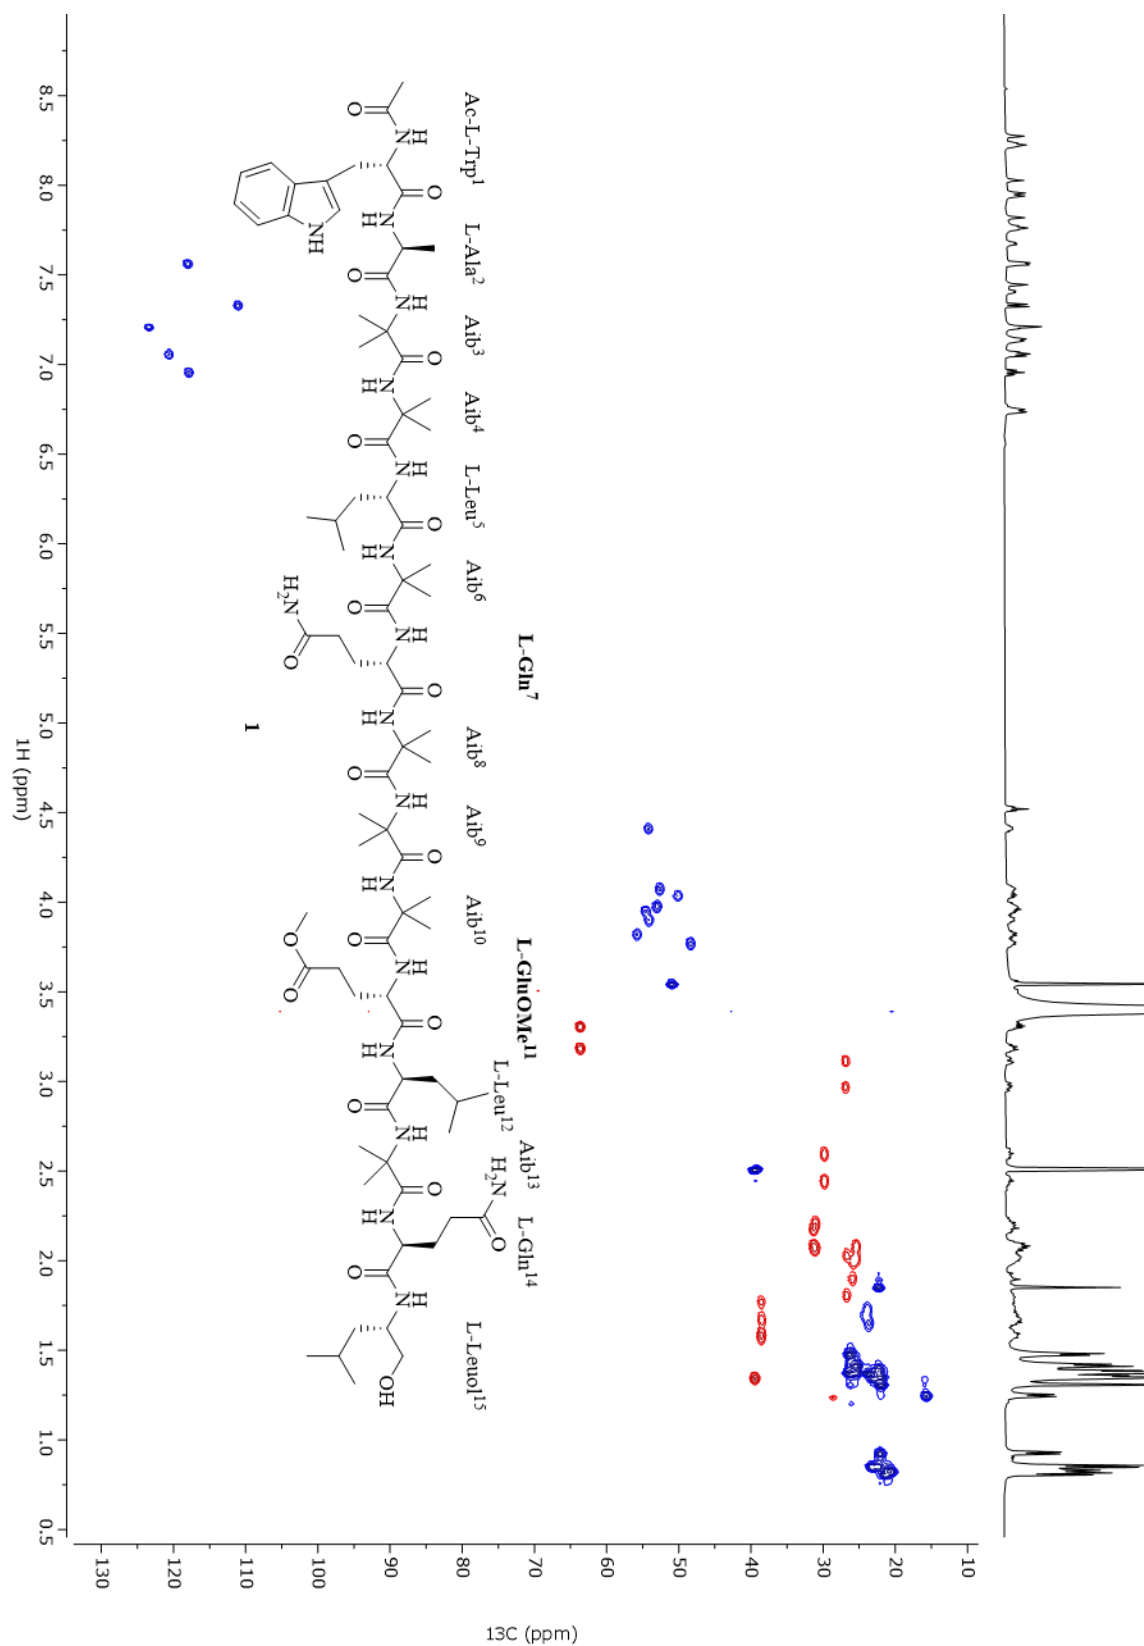

**Figure S18.**  $^1\text{H}$ ,  $^{13}\text{C}$  HSQC spectrum of synthetic ampullosporin F (1) (600 MHz,  $\text{DMSO}-d_6$ ).

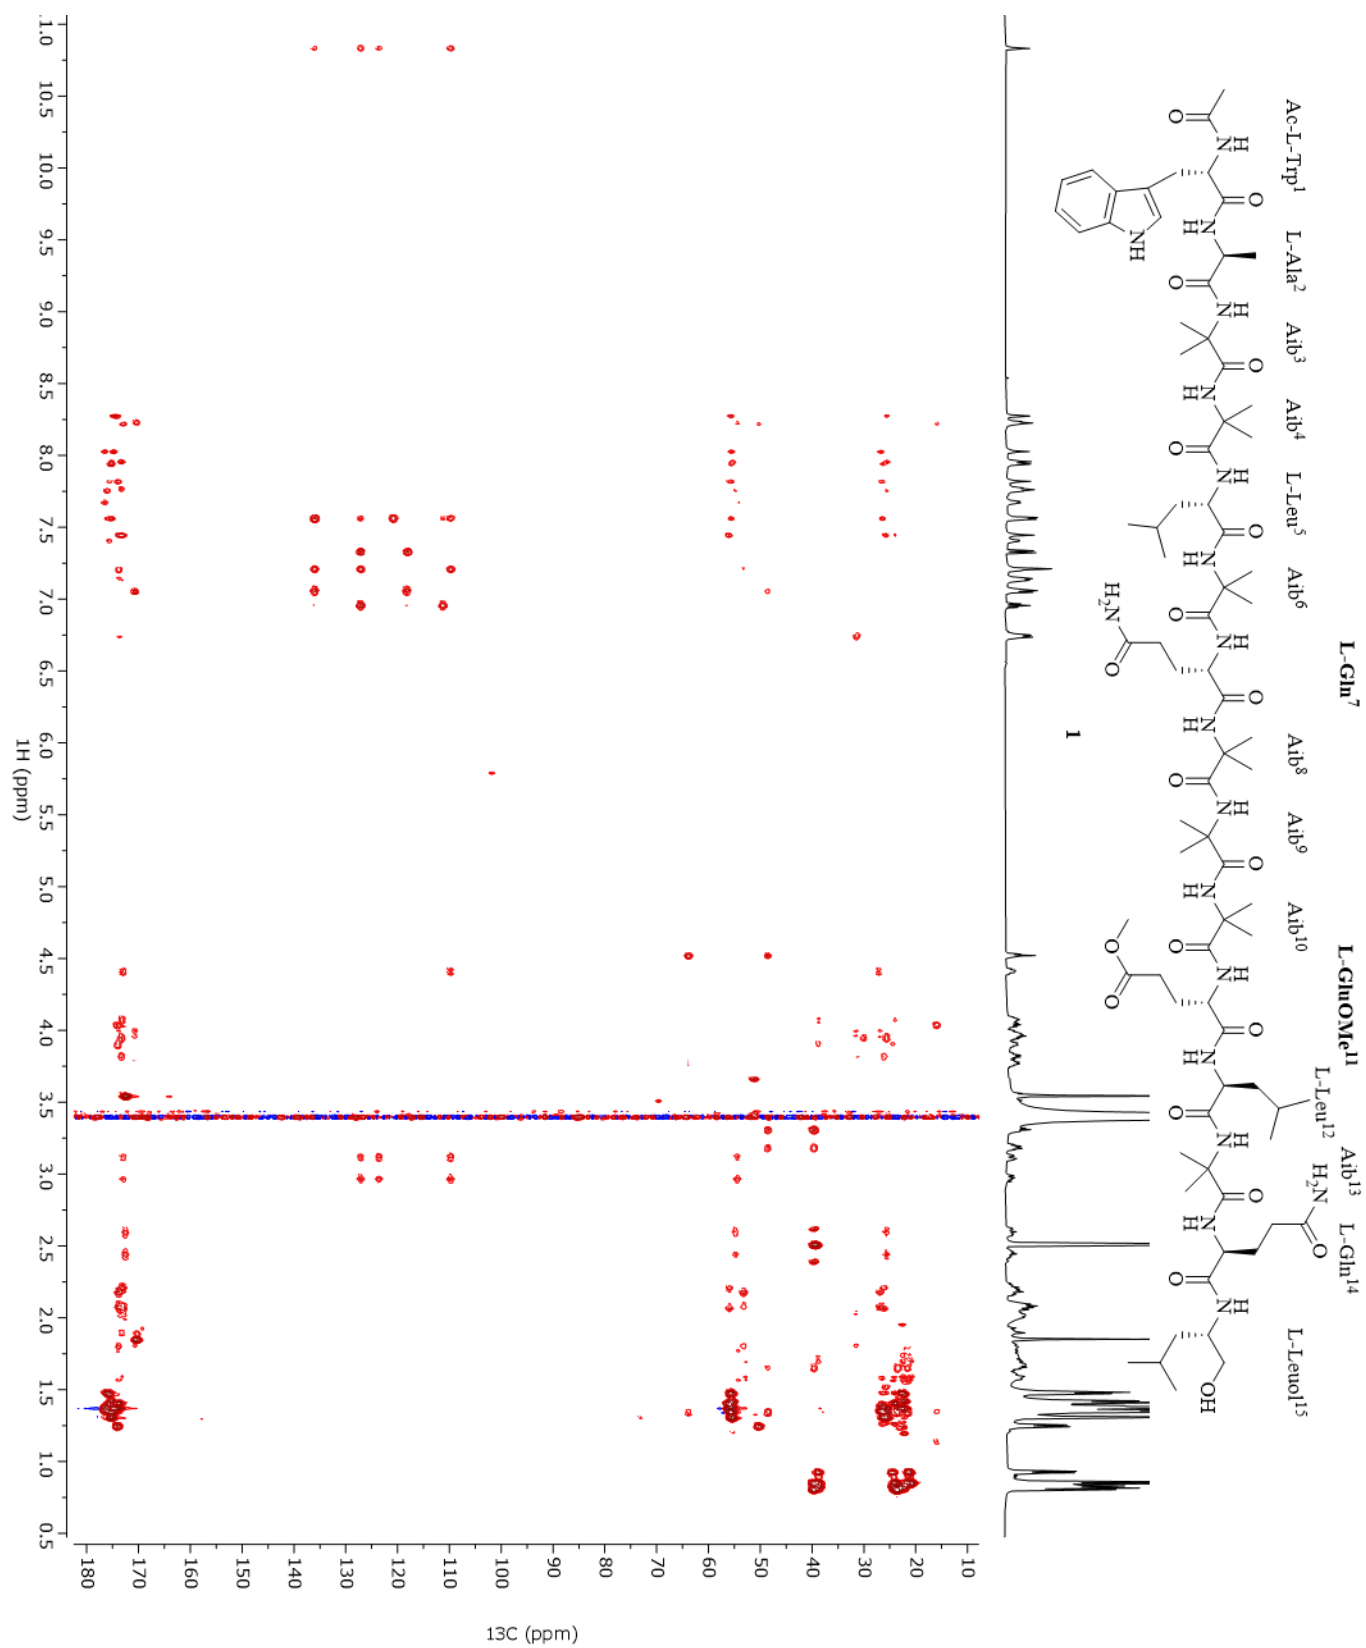

**Figure S19.**  $^1\text{H}$ ,  $^{13}\text{C}$  HMBC spectrum of synthetic ampullosporin F (**1**) (600 MHz,  $\text{DMSO}-d_6$ ).

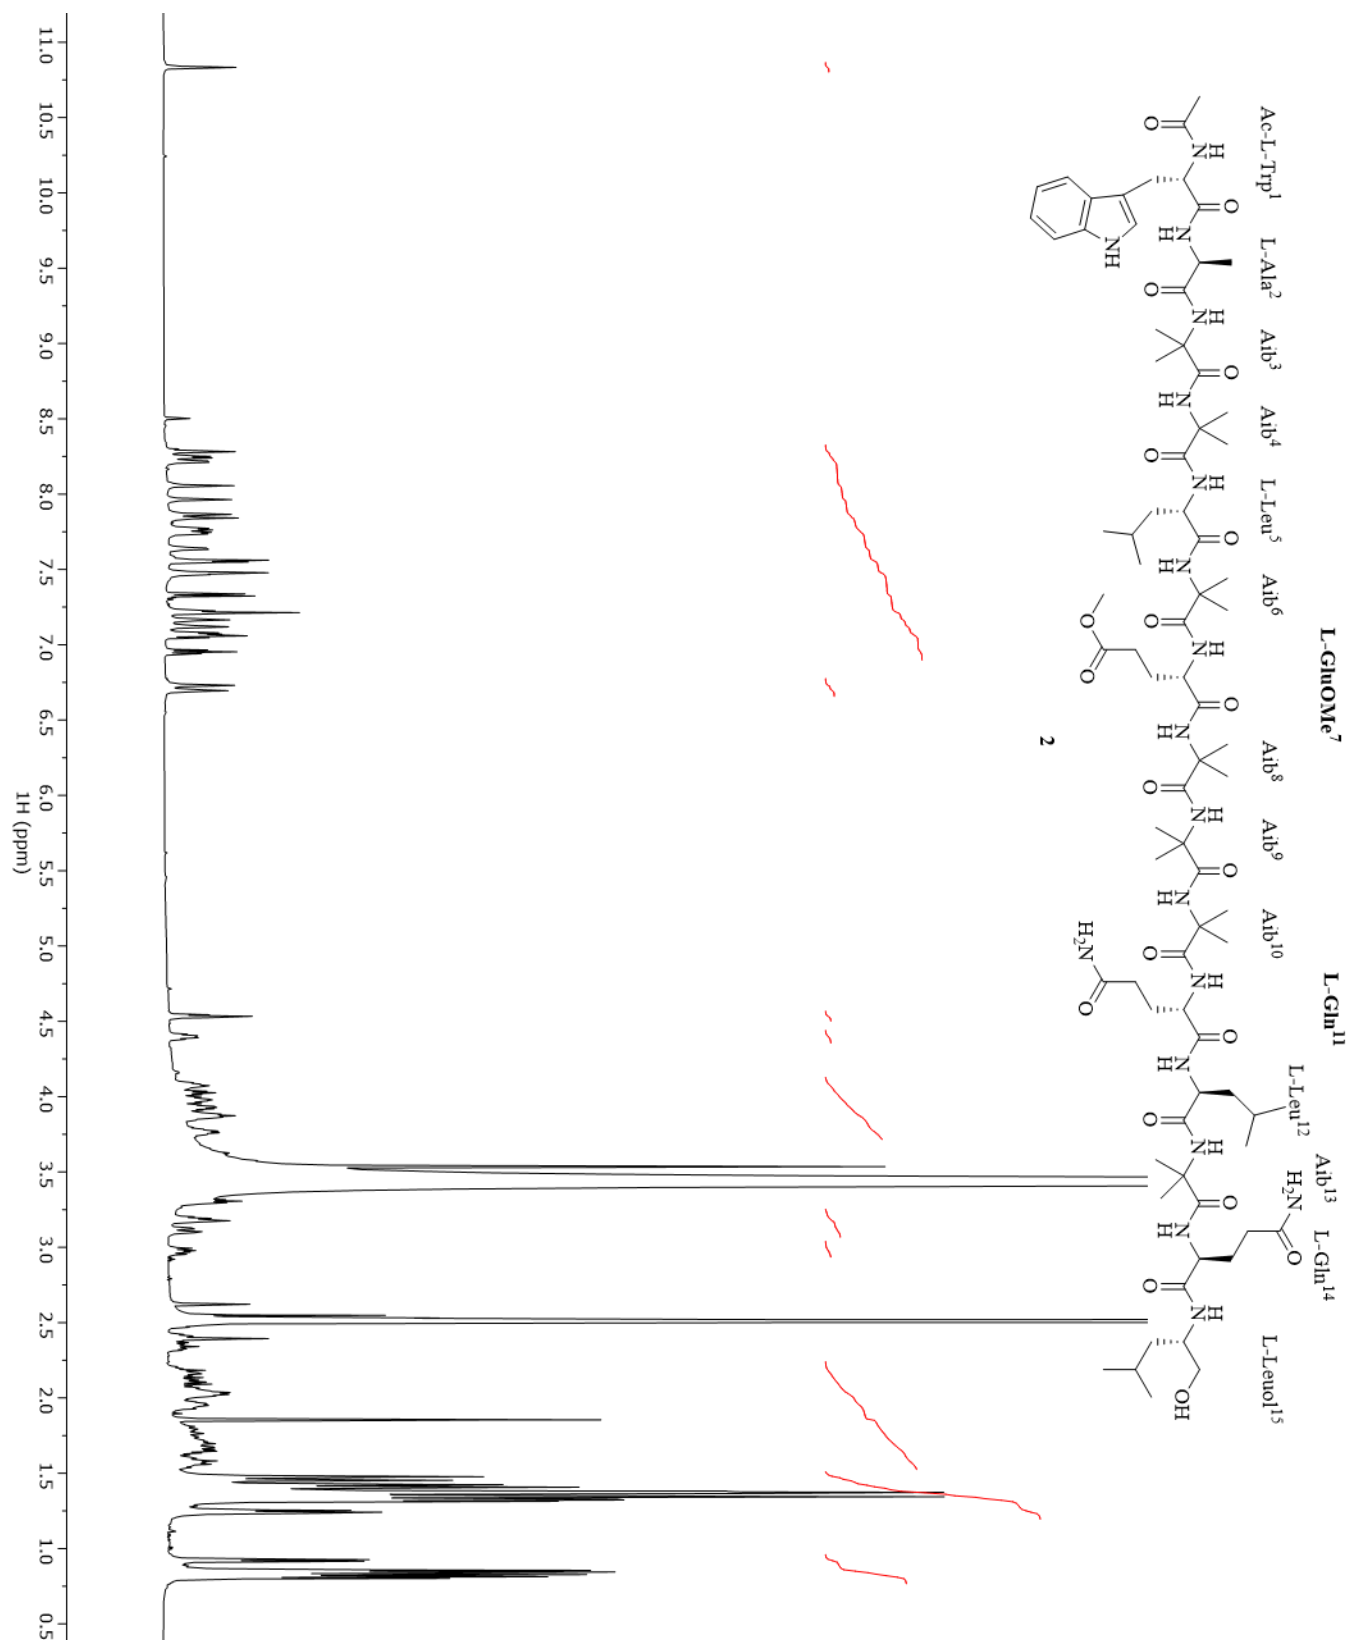

**Figure S20.** <sup>1</sup>H NMR spectrum of synthetic ampullosporin G (**2**) (600 MHz, DMSO-*d*<sub>6</sub>).

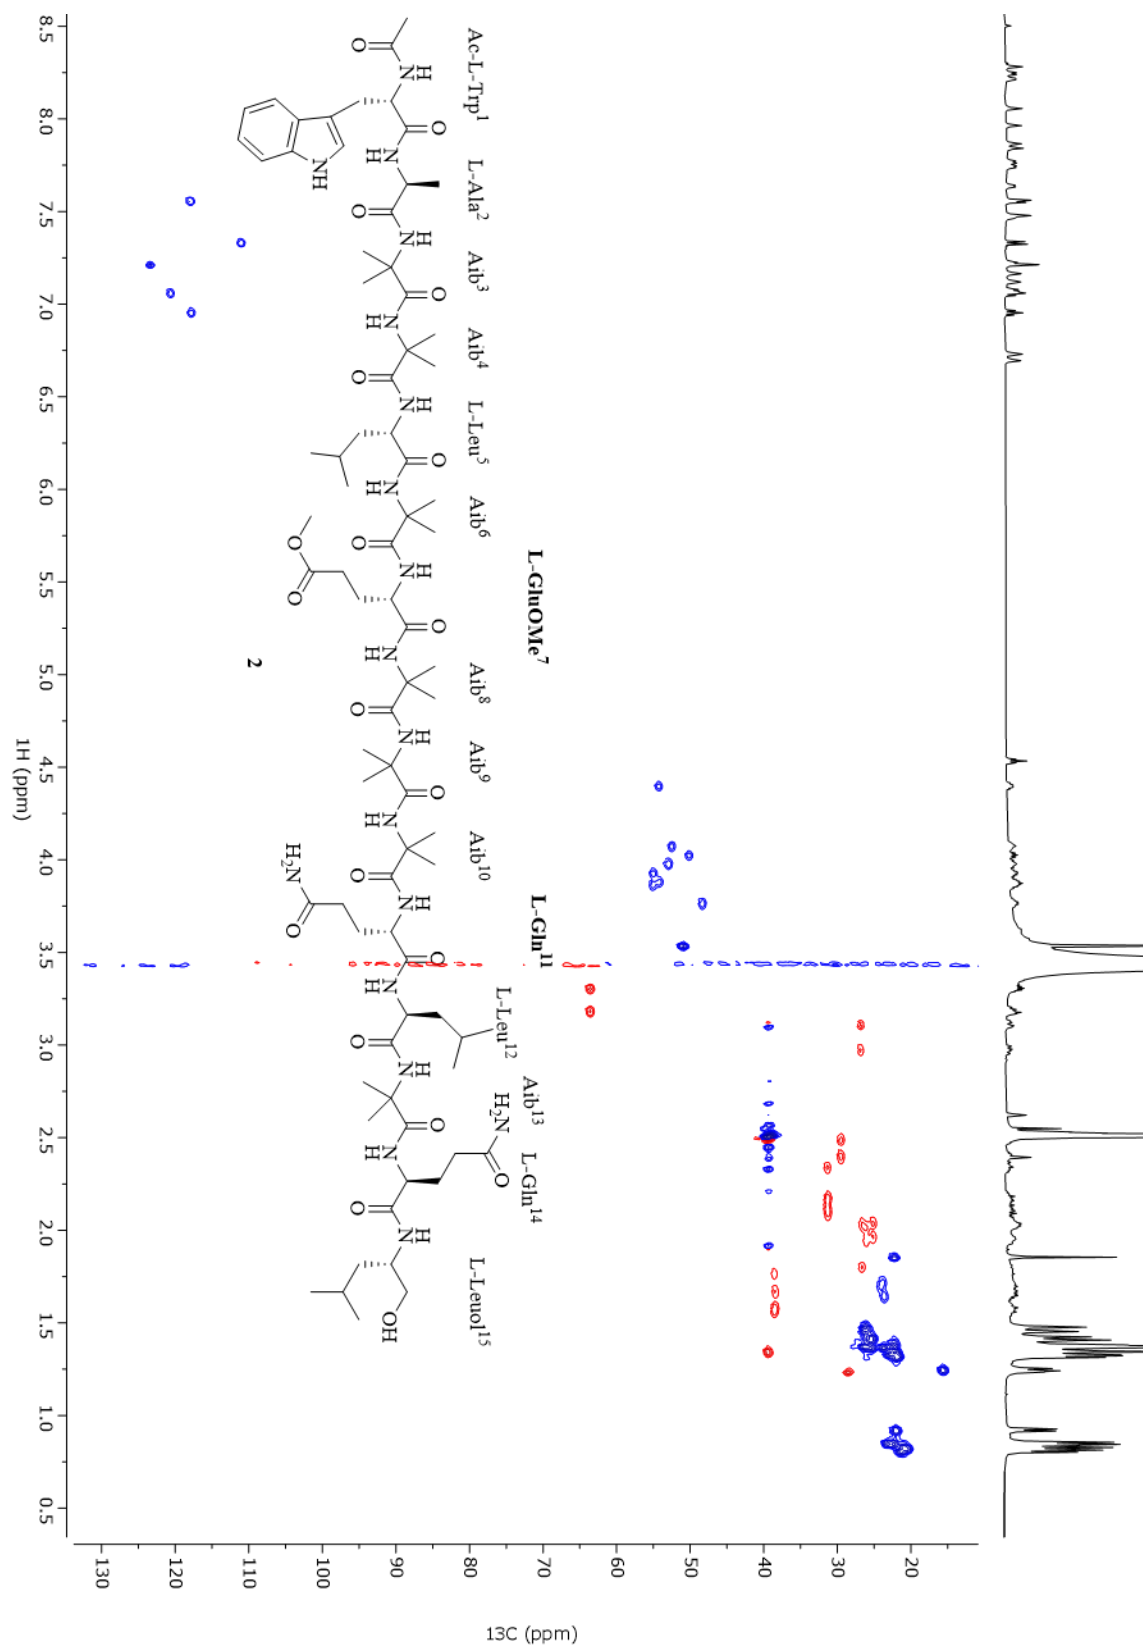

**Figure S21.**  $^1\text{H}$ ,  $^{13}\text{C}$  HSQC spectrum of synthetic ampullosporin G (2) (600 MHz,  $\text{DMSO}-d_6$ ).

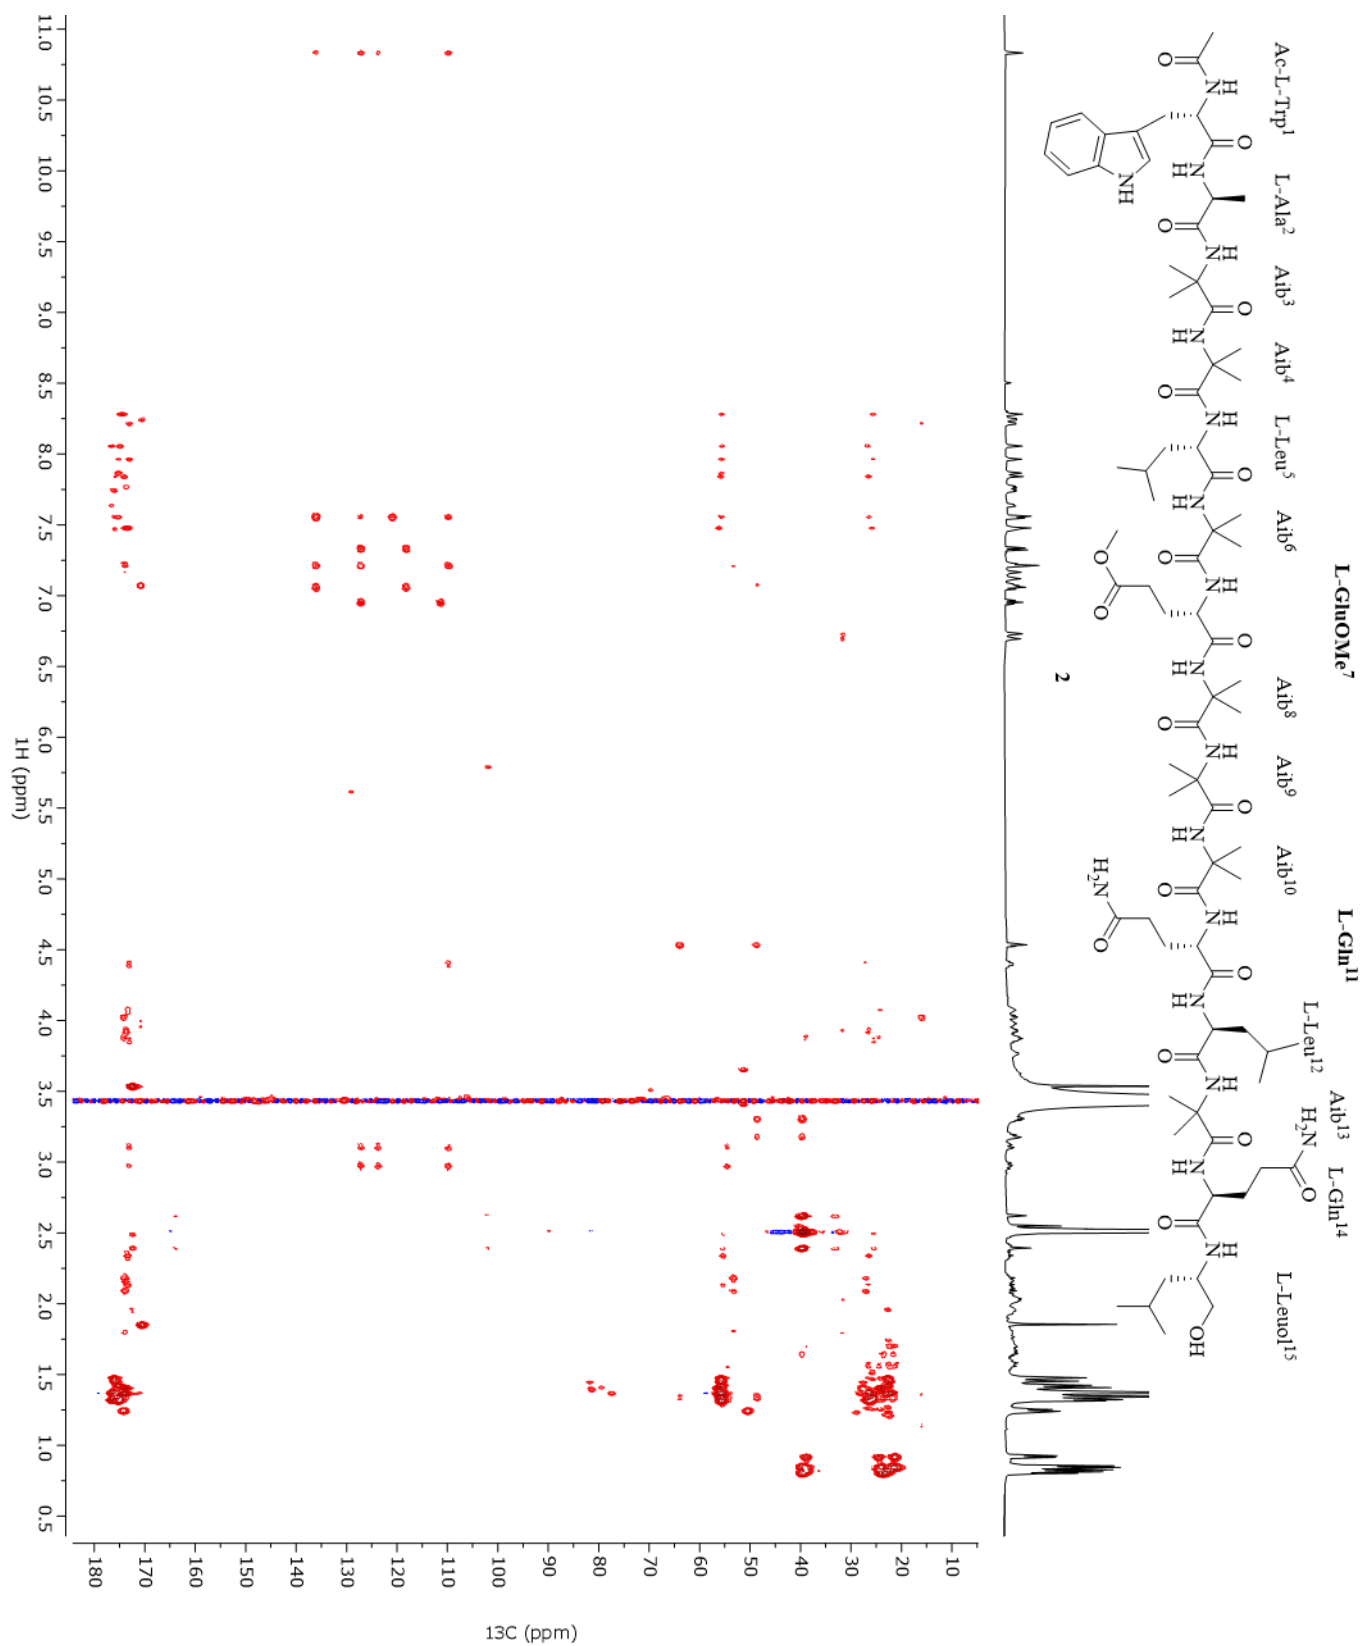

**Figure S22.** <sup>1</sup>H, <sup>13</sup>C HMBC spectrum of synthetic ampullosporin G (**2**) (600 MHz, DMSO-*d*<sub>6</sub>).



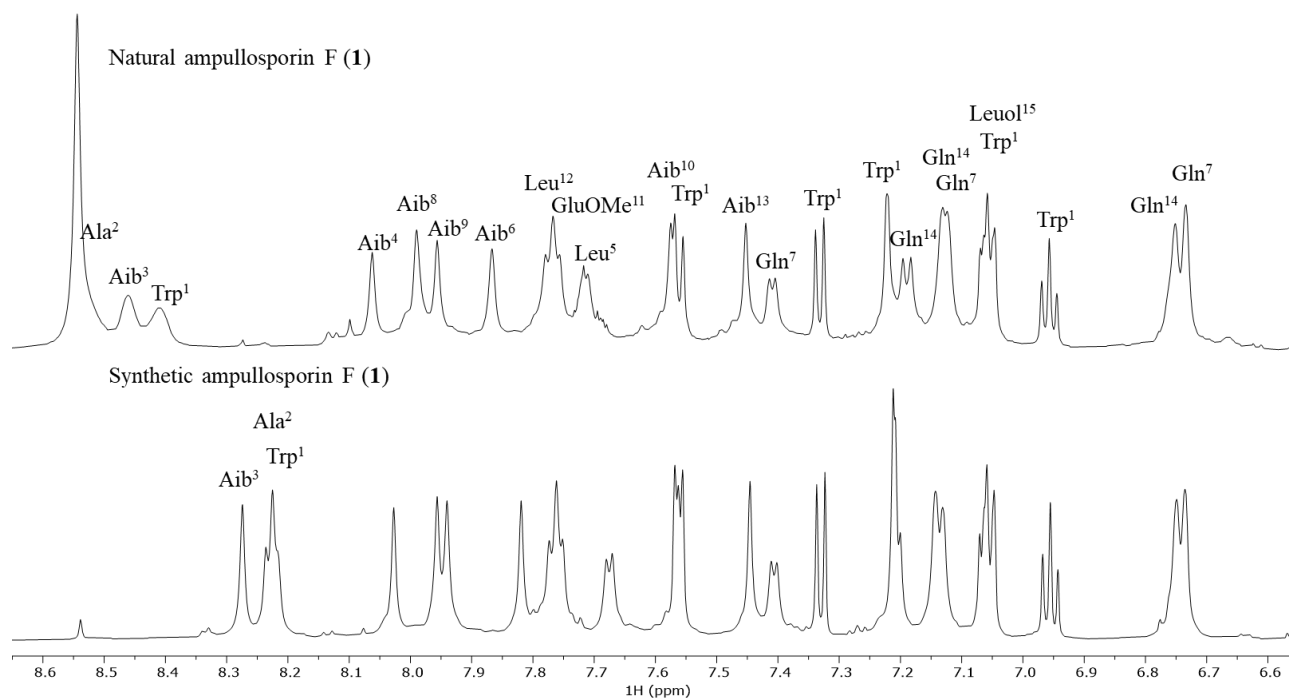

**Figure S23.** Comparison of the amide and aromatic region in the  $^1\text{H}$  NMR of natural and synthetic ampullosporin F (1) (600 MHz,  $\text{DMSO}-d_6$ ).

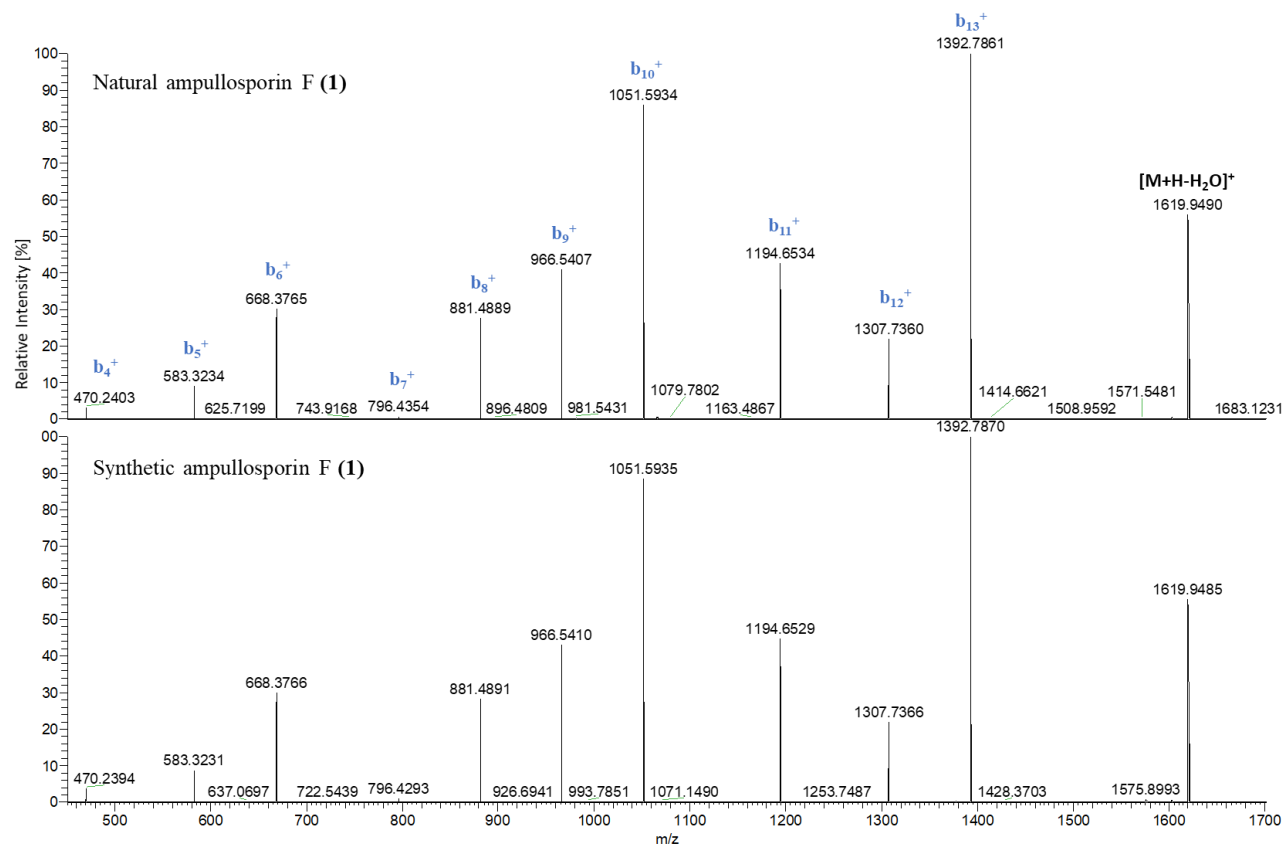

**Figure S24.** Positive ion  $\text{MS}^2$  spectra of the  $[\text{M}+\text{H}]^+$  of natural and synthetic ampullosporin F (1).

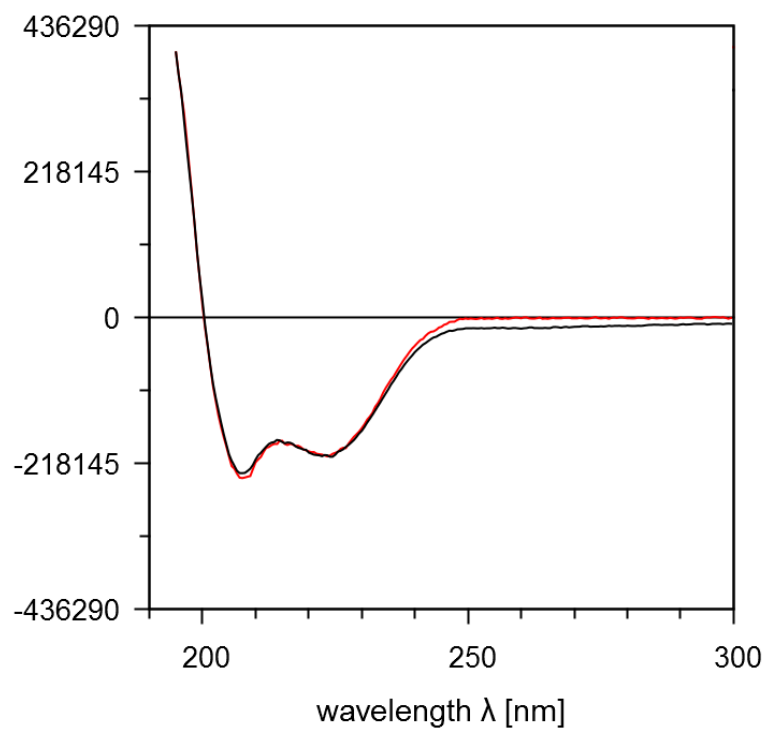

**Figure S25.** CD spectra of natural (in red) and synthetic (in black) ampullosporin F (**1**) in MeOH.

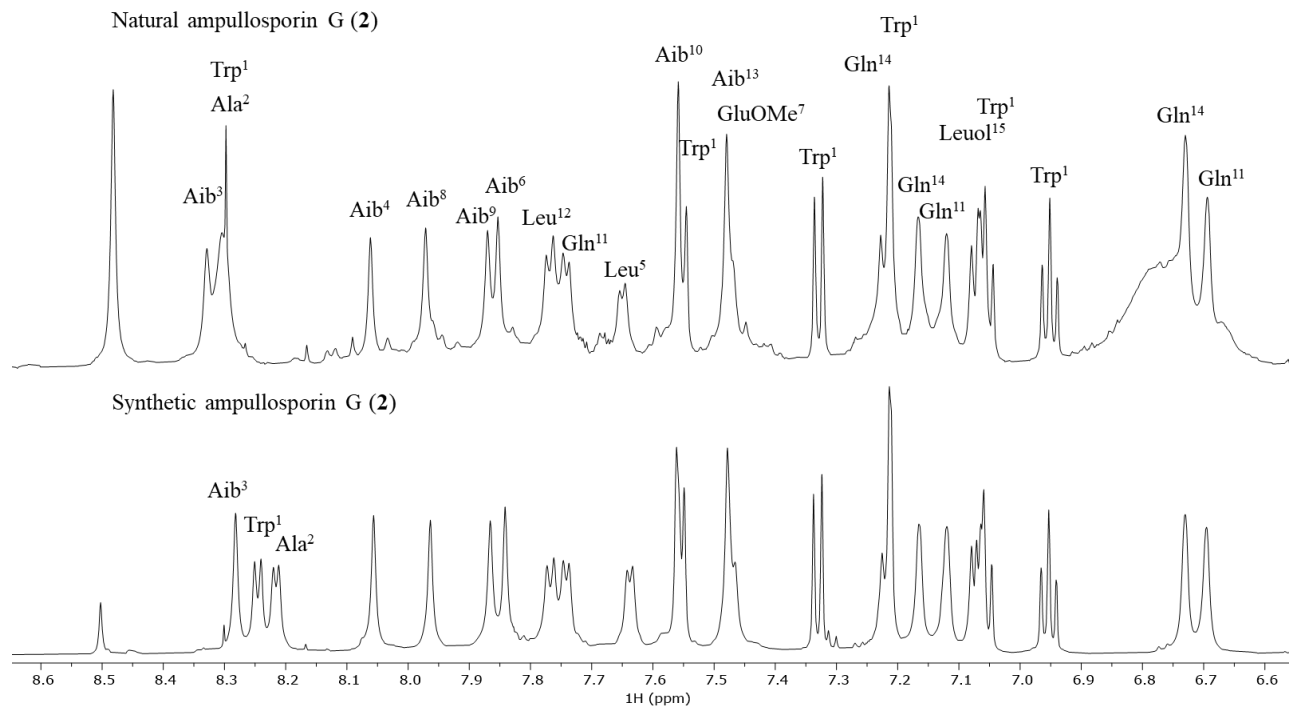

**Figure S26.** Comparison of the amide and aromatic region in the  $^1\text{H}$  NMR of natural and synthetic ampullosporin G (2) (600 MHz,  $\text{DMSO}-d_6$ ).

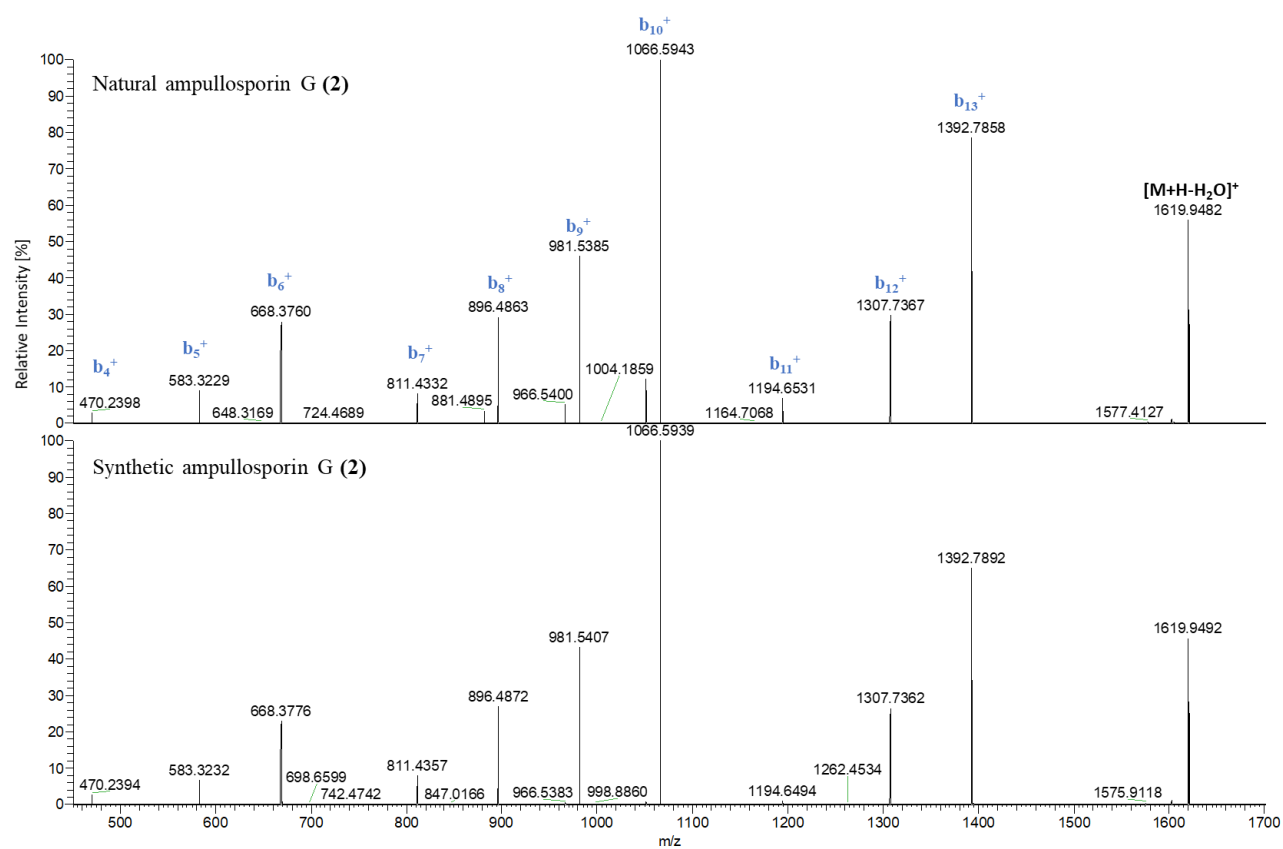

**Figure S27.** Positive ion  $\text{MS}^2$  spectra of the  $[\text{M}+\text{H}]^+$  of natural and synthetic ampullosporin G (2).

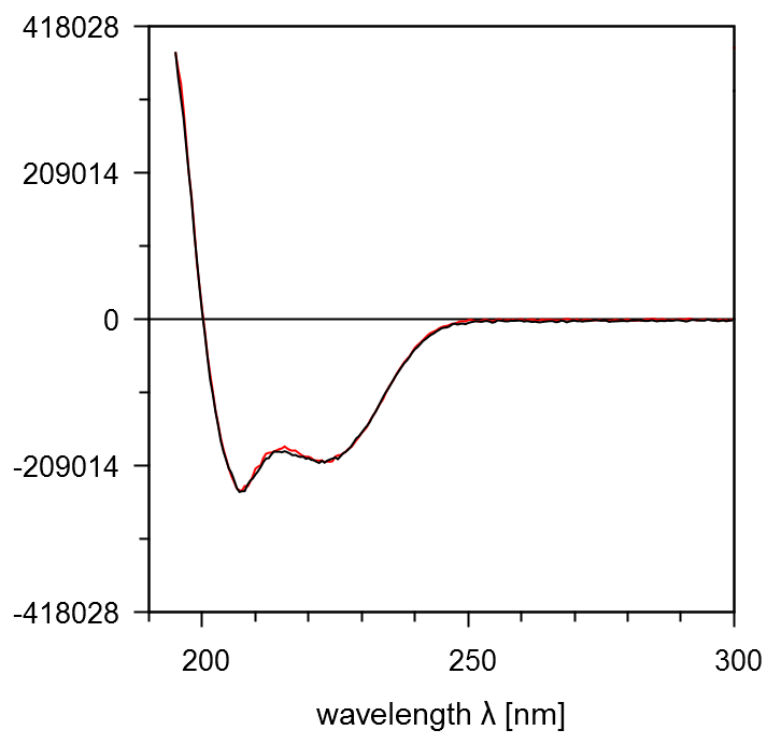

**Figure S28.** CD spectra of natural (in red) and synthetic (in black) ampullosporin G (**2**) in MeOH.

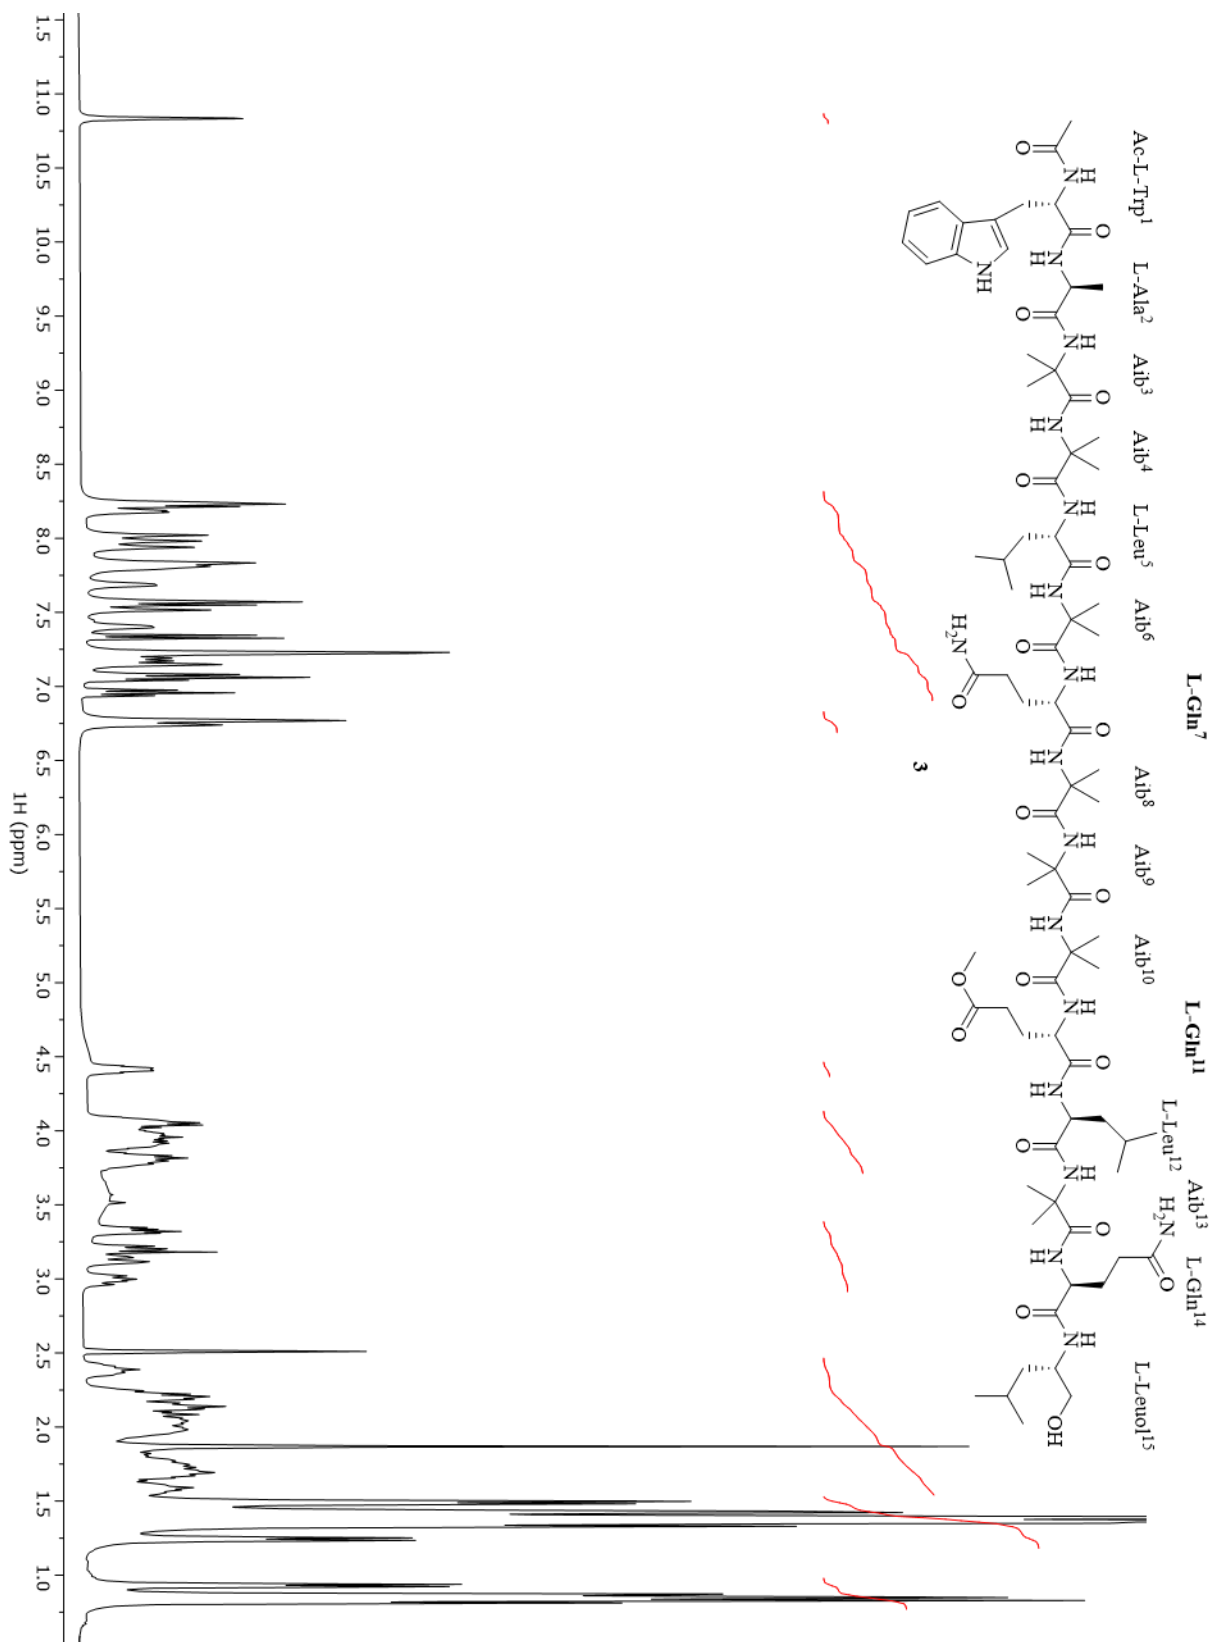

**Figure S29.**  $^1\text{H}$  NMR spectrum of natural ampullosporin A (3) (400 MHz,  $\text{DMSO}-d_6$ ).

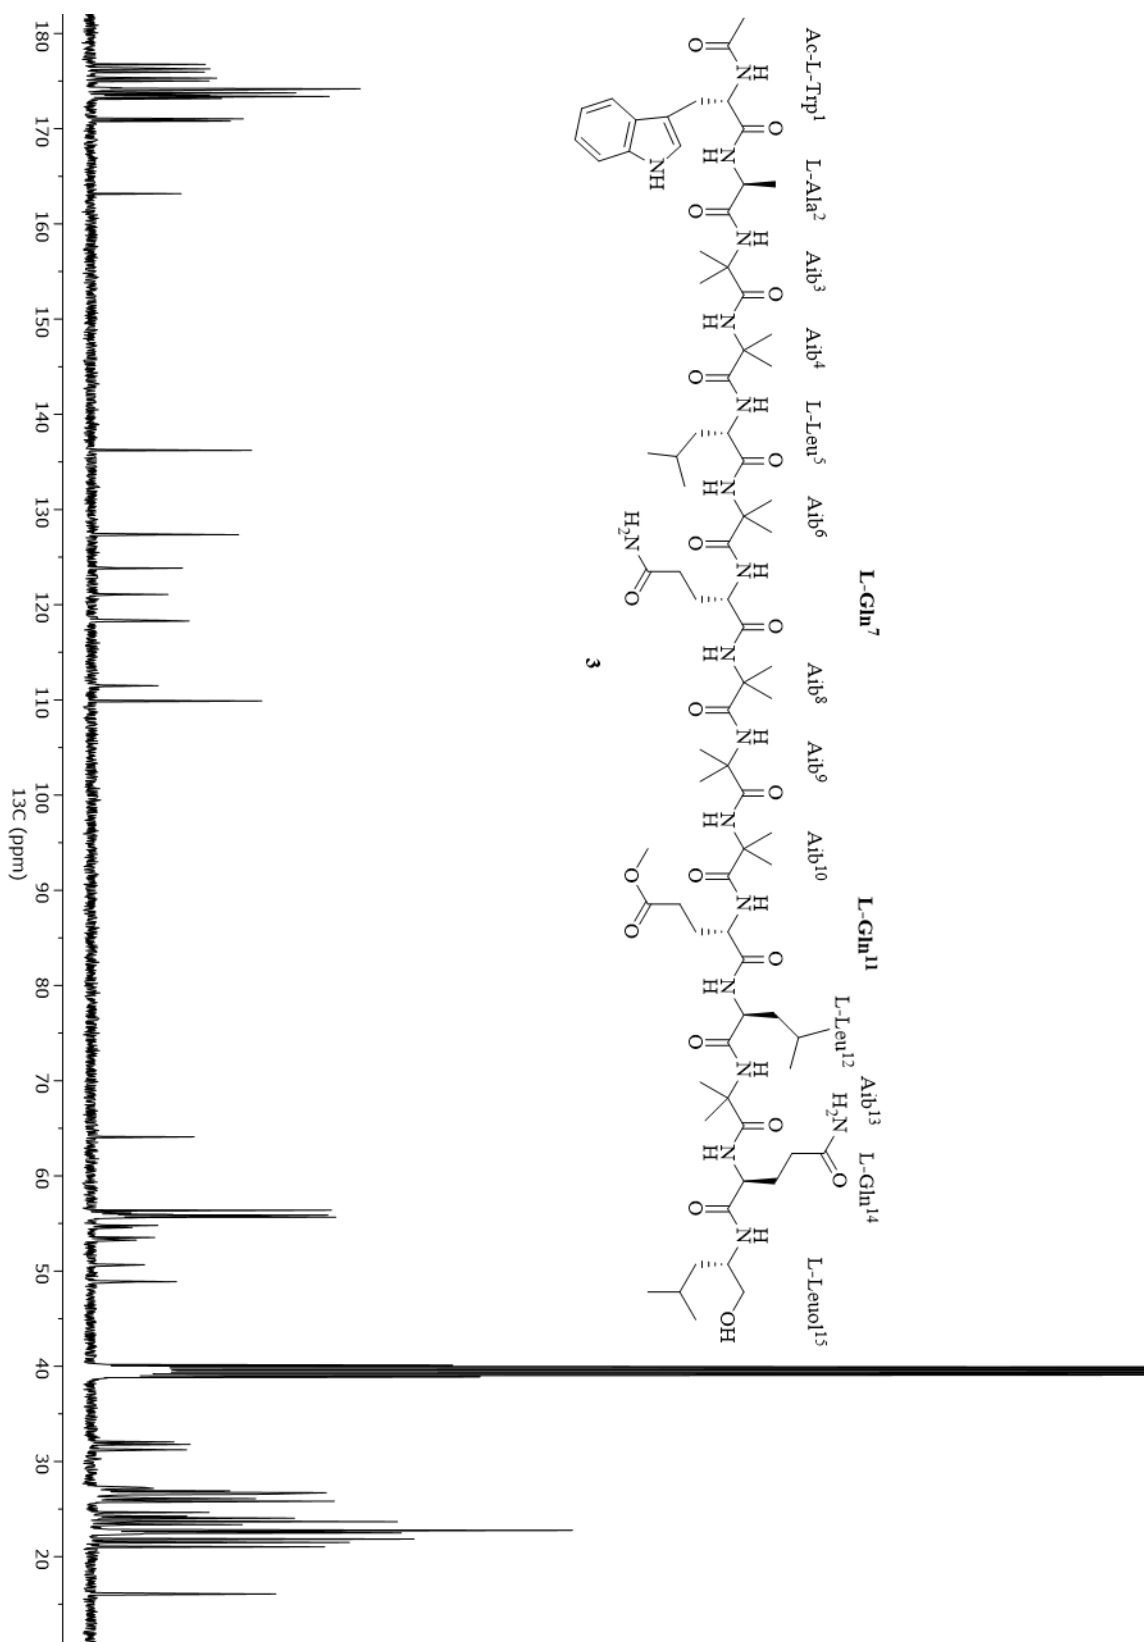

**Figure S30.**  $^{13}\text{C}$  NMR spectrum of natural ampullosporin A (**3**) (100 MHz, DMSO- $d_6$ ).

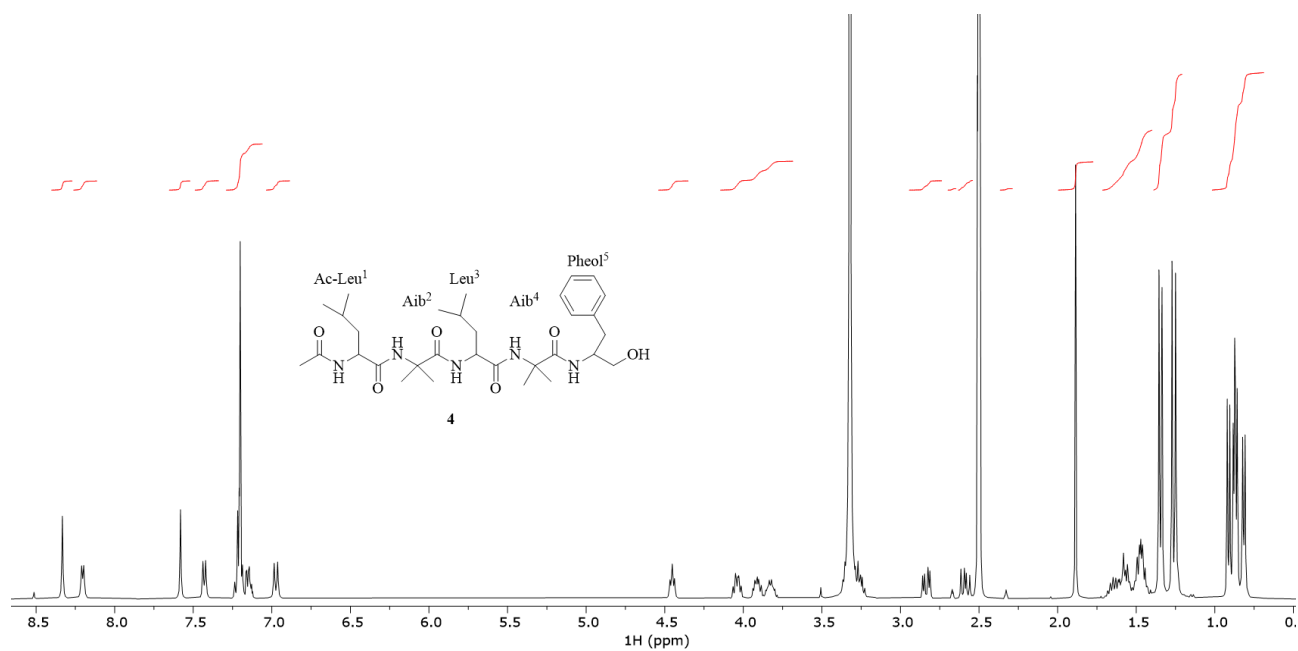

**Figure S31.** <sup>1</sup>H NMR spectrum of natural peptaibolin (4) (400 MHz, DMSO-*d*<sub>6</sub>).

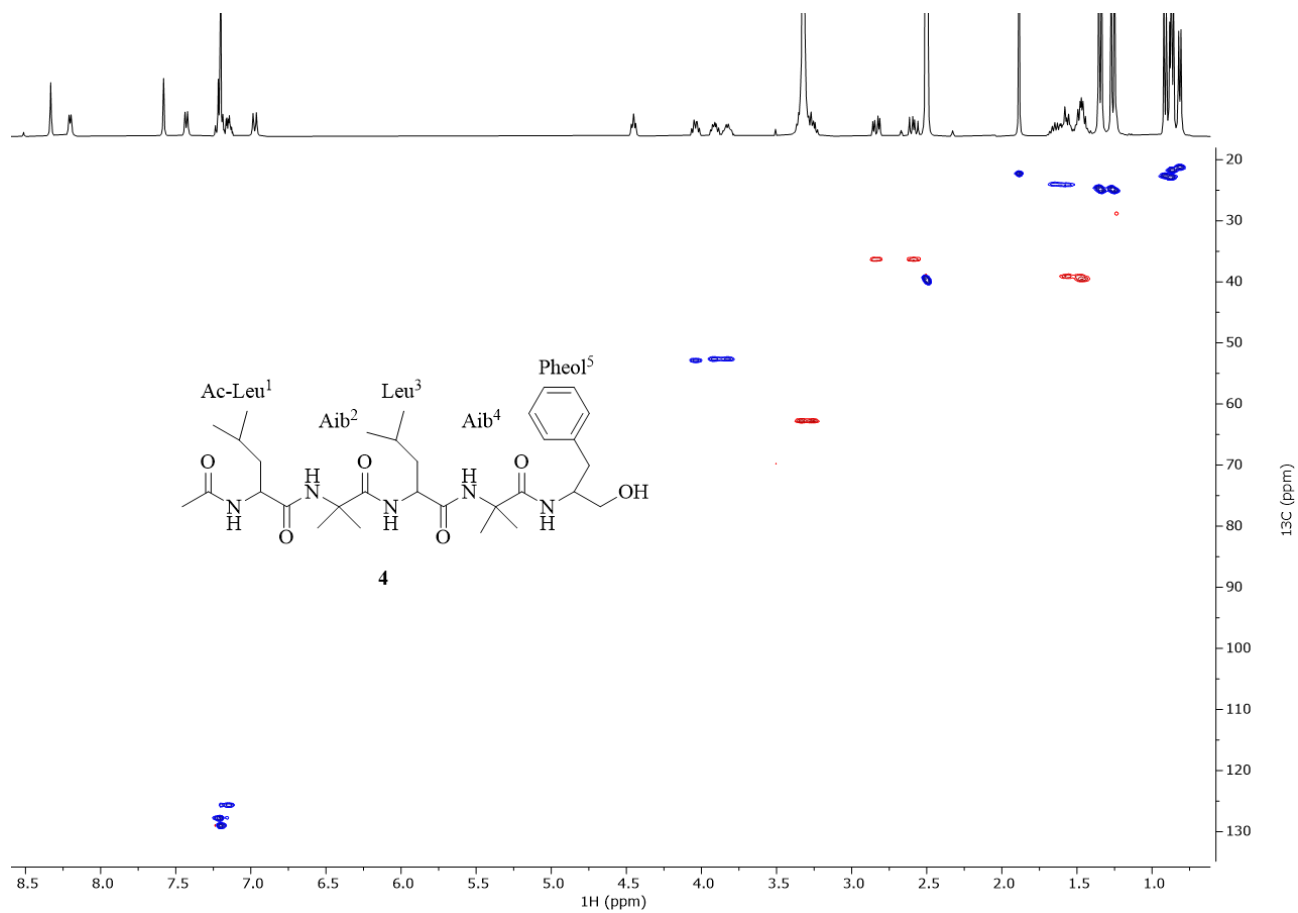

**Figure S32.** <sup>1</sup>H, <sup>13</sup>C HSQC spectrum of natural peptaibolin (4) (400 MHz, DMSO-*d*<sub>6</sub>).

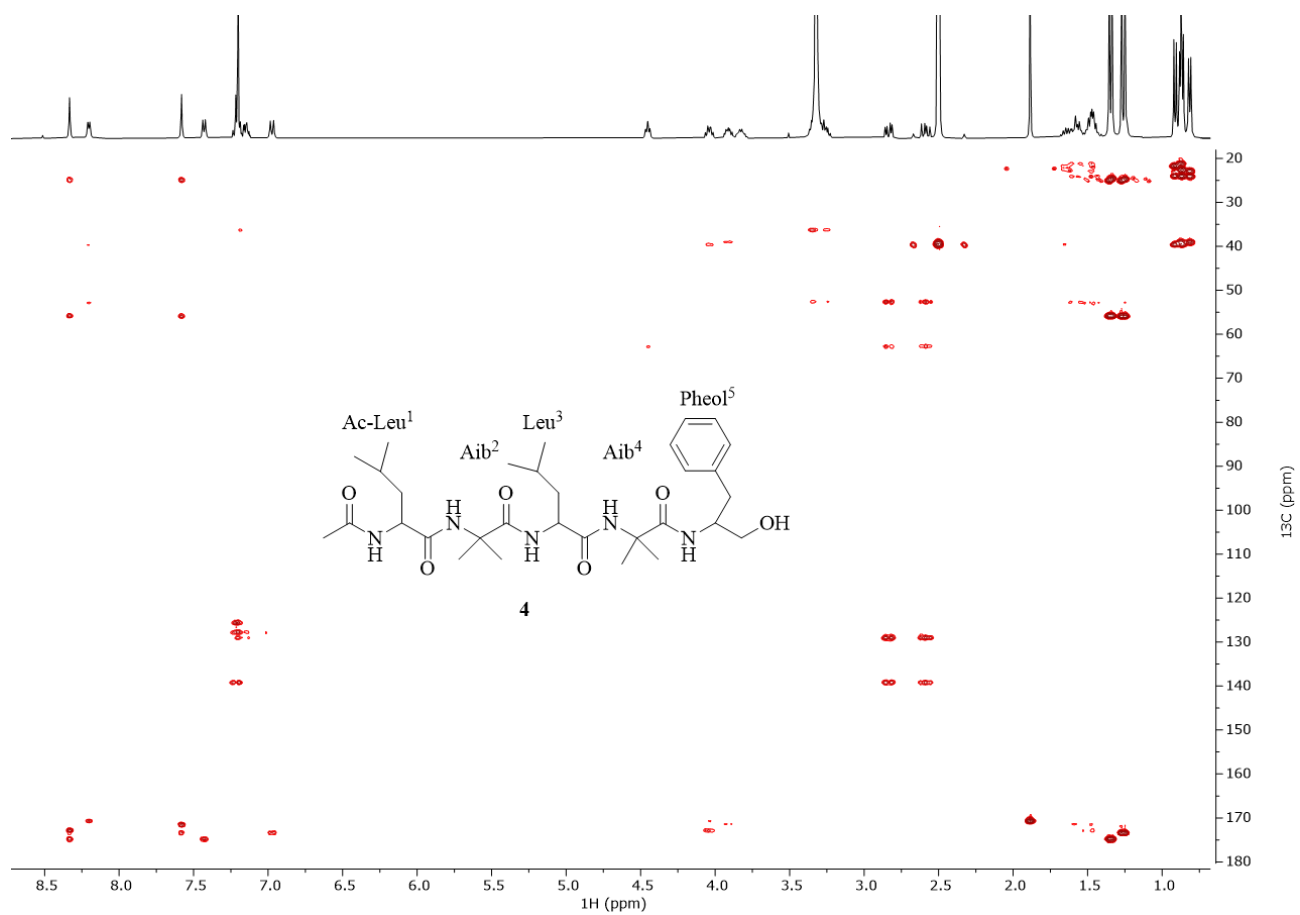

**Figure S33.**  $^1\text{H}$ ,  $^{13}\text{C}$  HMBC spectrum of natural peptaibolin (**4**) (400 MHz,  $\text{DMSO}-d_6$ ).



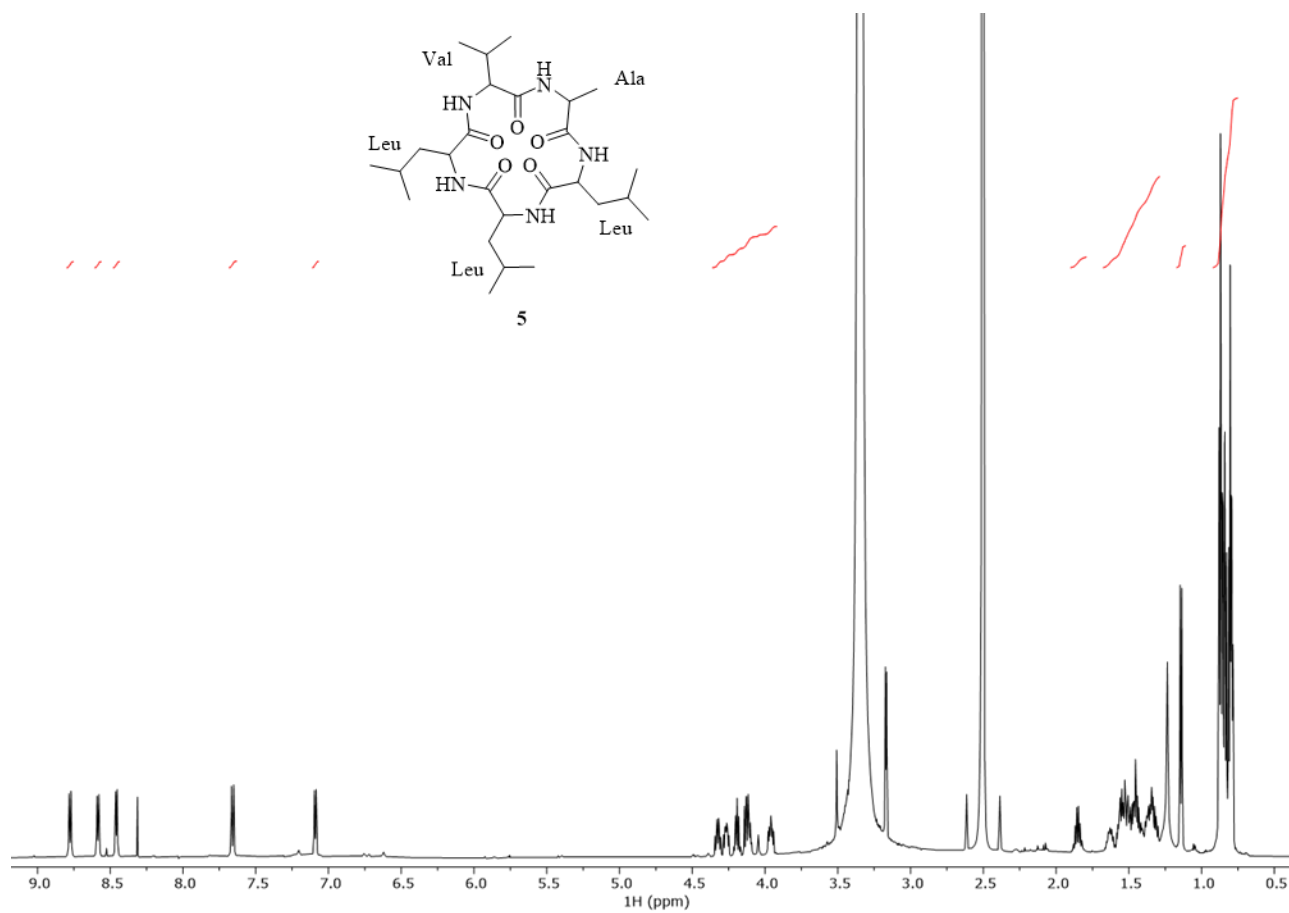

**Figure S34.**  $^1\text{H}$  NMR spectrum of natural chrysosporide (5) (600 MHz,  $\text{DMSO-}d_6$ ).

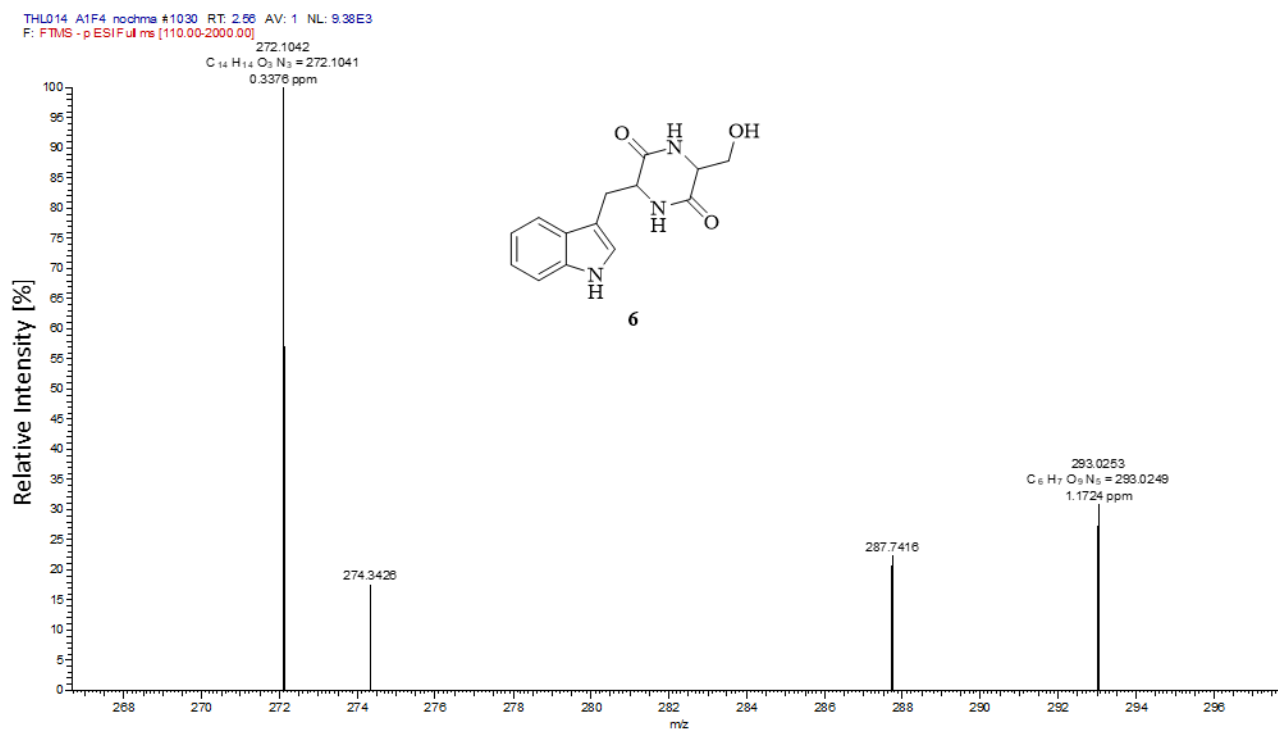

Figure S35. Negative ion mass spectrum of natural c(Trp-Ser) (6).

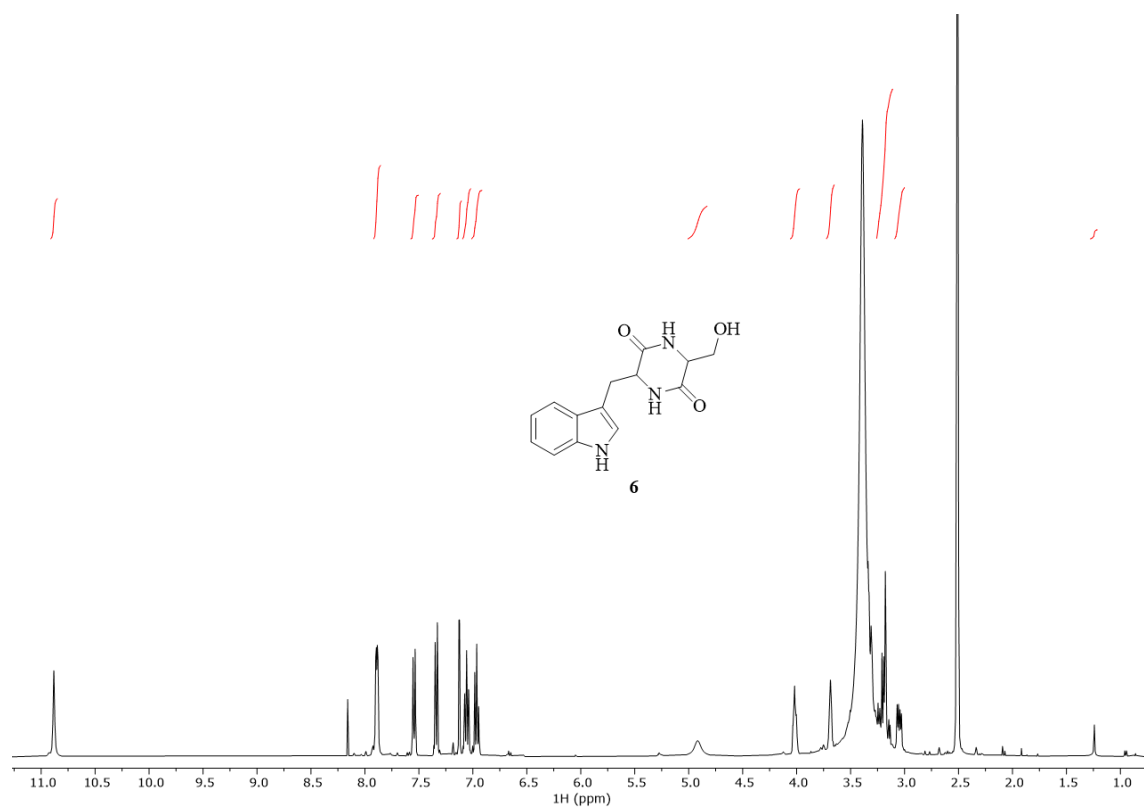

**Figure S36.** <sup>1</sup>H NMR spectrum of natural c(Trp-Ser) (6) (400 MHz, DMSO-*d*<sub>6</sub>).

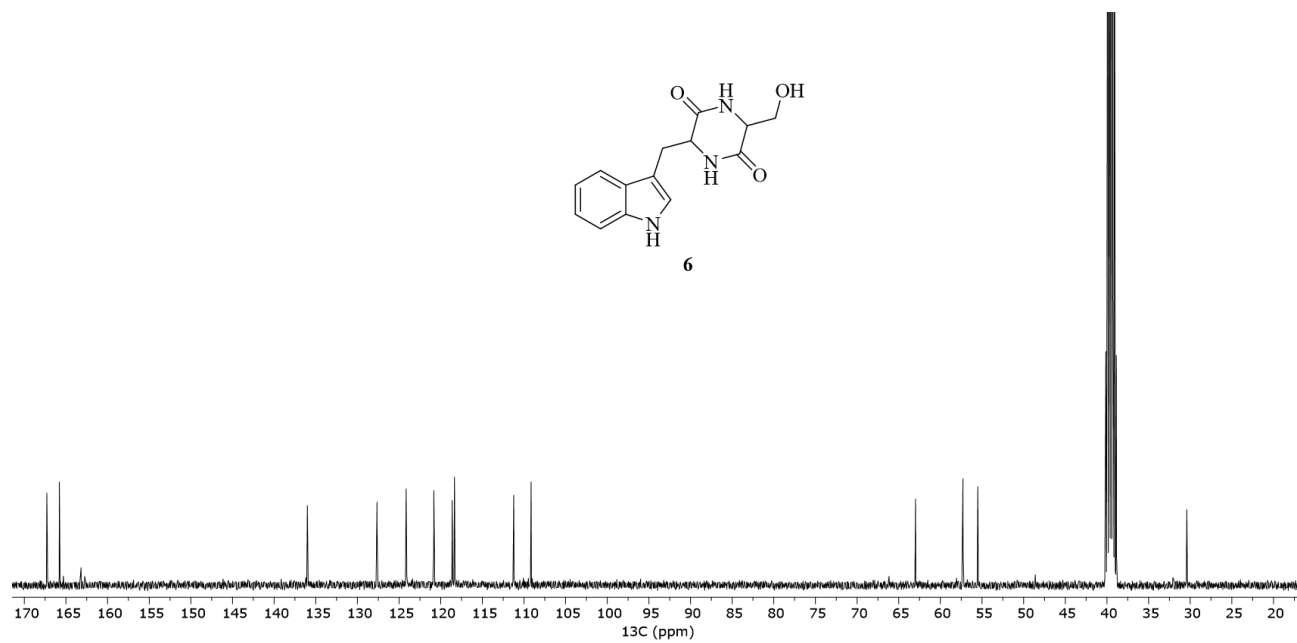

**Figure S37.** <sup>13</sup>C NMR spectrum of natural c(Trp-Ser) (6) (100 MHz, DMSO-*d*<sub>6</sub>).

THL014\_A1F5\_nochma #1694 RT: 4.22 AV: 1 NL: 6.41E4  
T: FTMS - p ESI Full ms [110.00-2000.00]

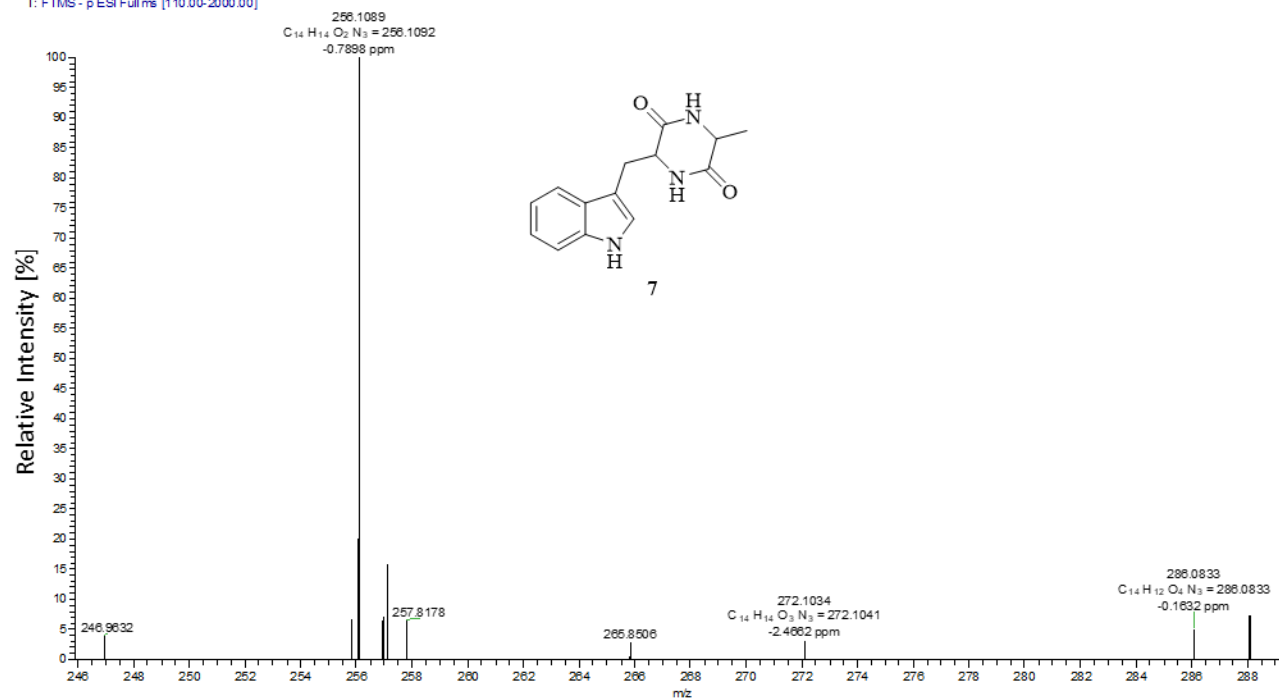

Figure S38. Negative ion mass spectrum of natural c(Trp-Ala) (7).

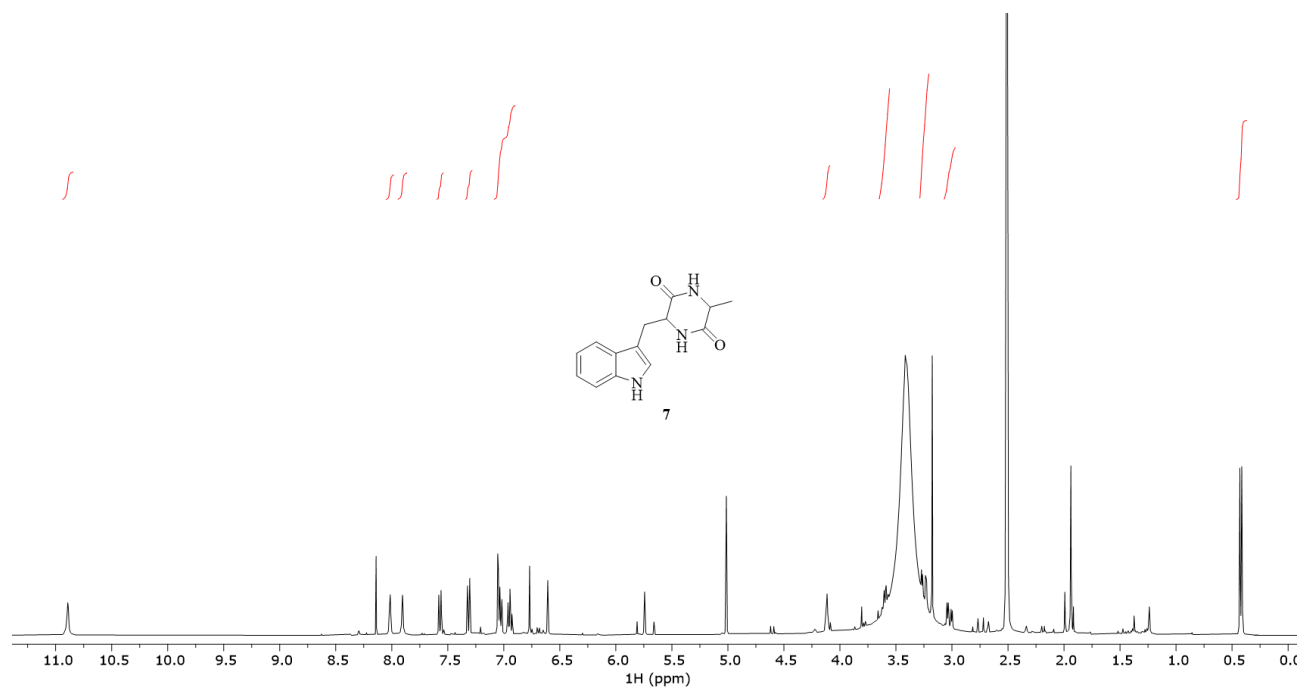

**Figure S39.** <sup>1</sup>H NMR spectrum of natural c(Trp-Ala) (7) (400 MHz, DMSO-*d*<sub>6</sub>).

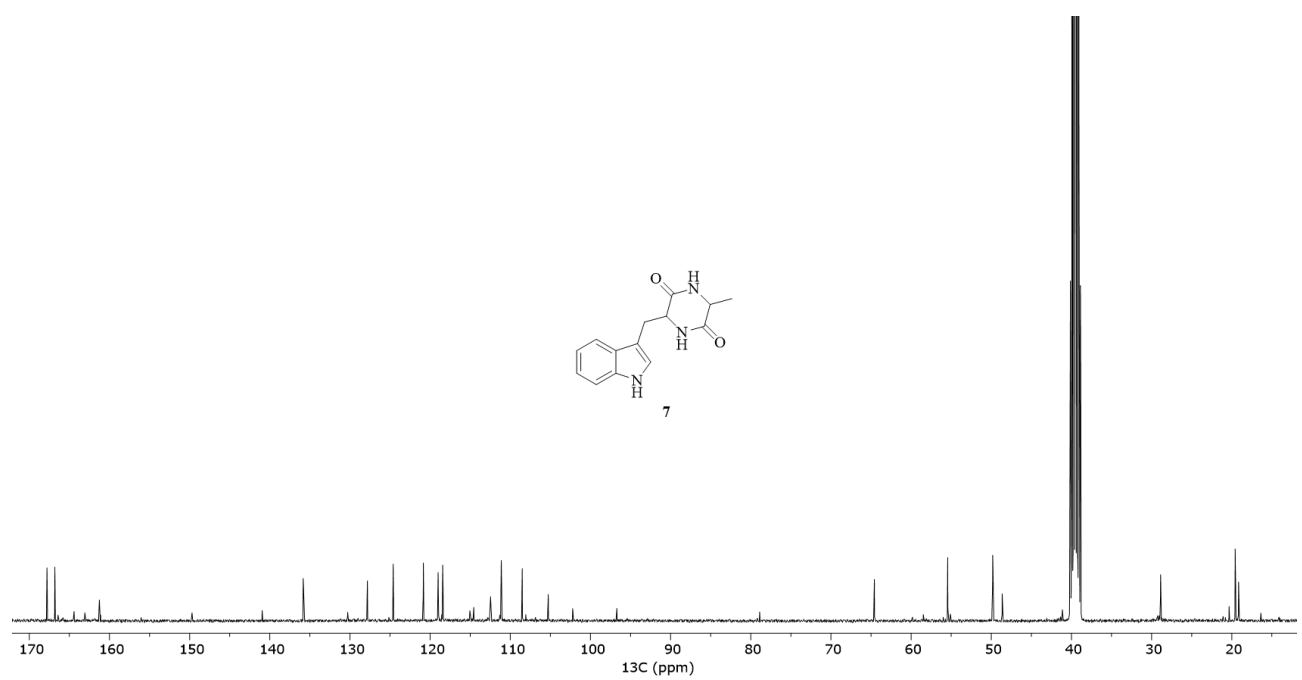

**Figure S40.** <sup>13</sup>C NMR spectrum of natural c(Trp-Ala) (7) (100 MHz, DMSO-*d*<sub>6</sub>).

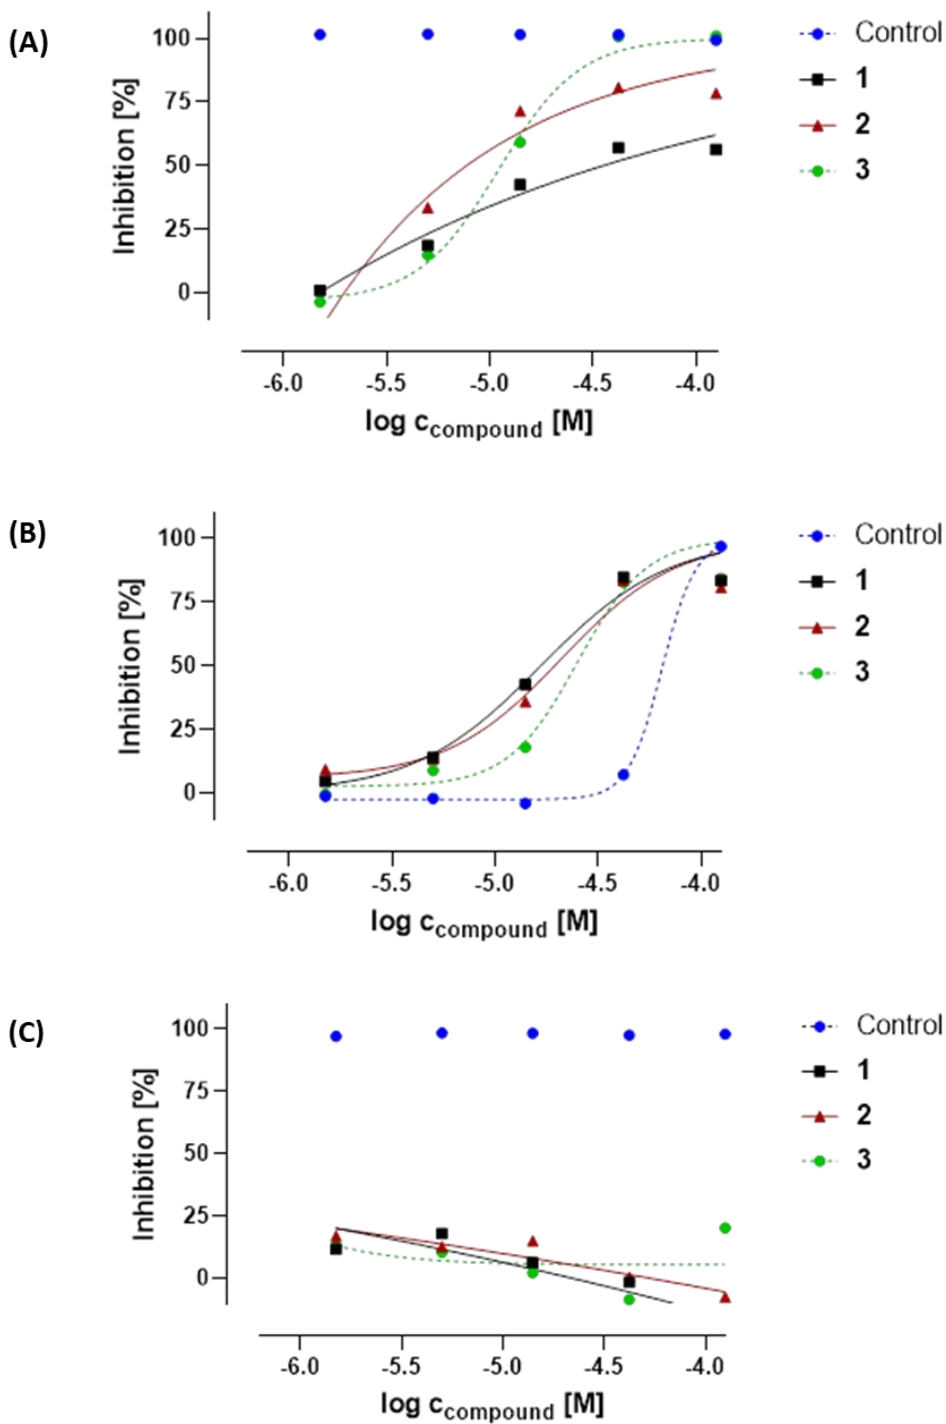

**Figure S41** Antiphytopathogenic activity of ampullosporin F (1), G (2), and A (3) against: (A) *B. cinerea*, Control = Epoxiconazole; (B) *P. infestans*, Control = Terbinafine; and (C) *S. tritici*, Control = Epoxiconazole.

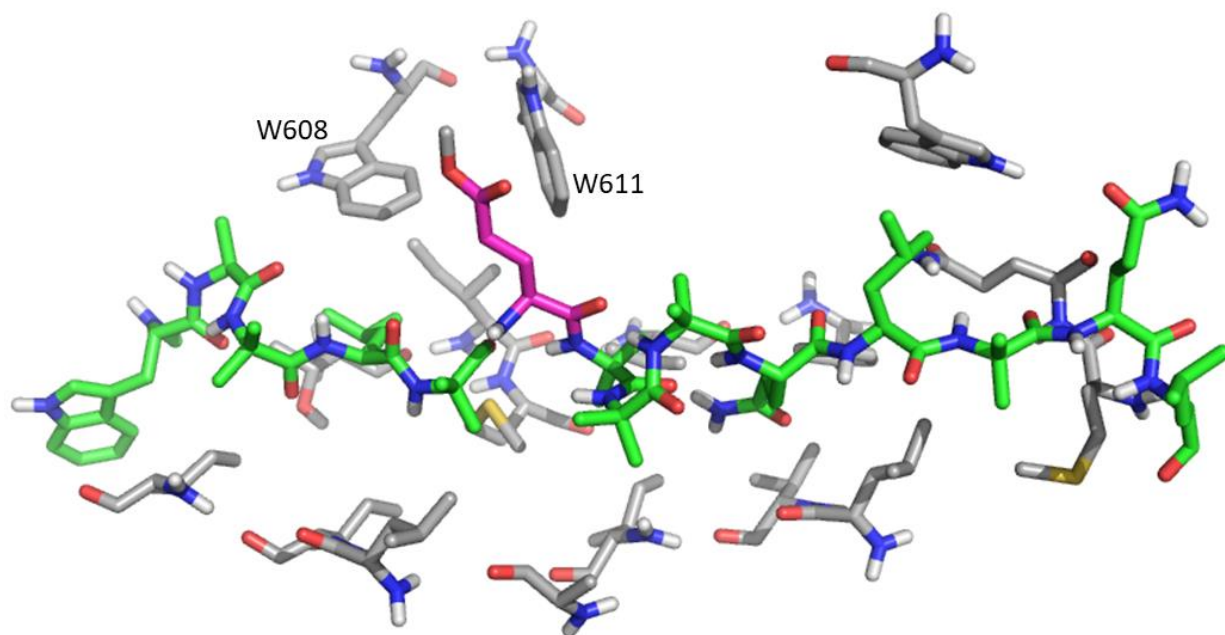

**Figure S42** Docking arrangements of ampullosporin G (2) in the proposed binding site in the hydrophobic cleft between NMDA receptor subunits GluN1 and GluN2A, as modeled based on protein databank entry 6IRA.

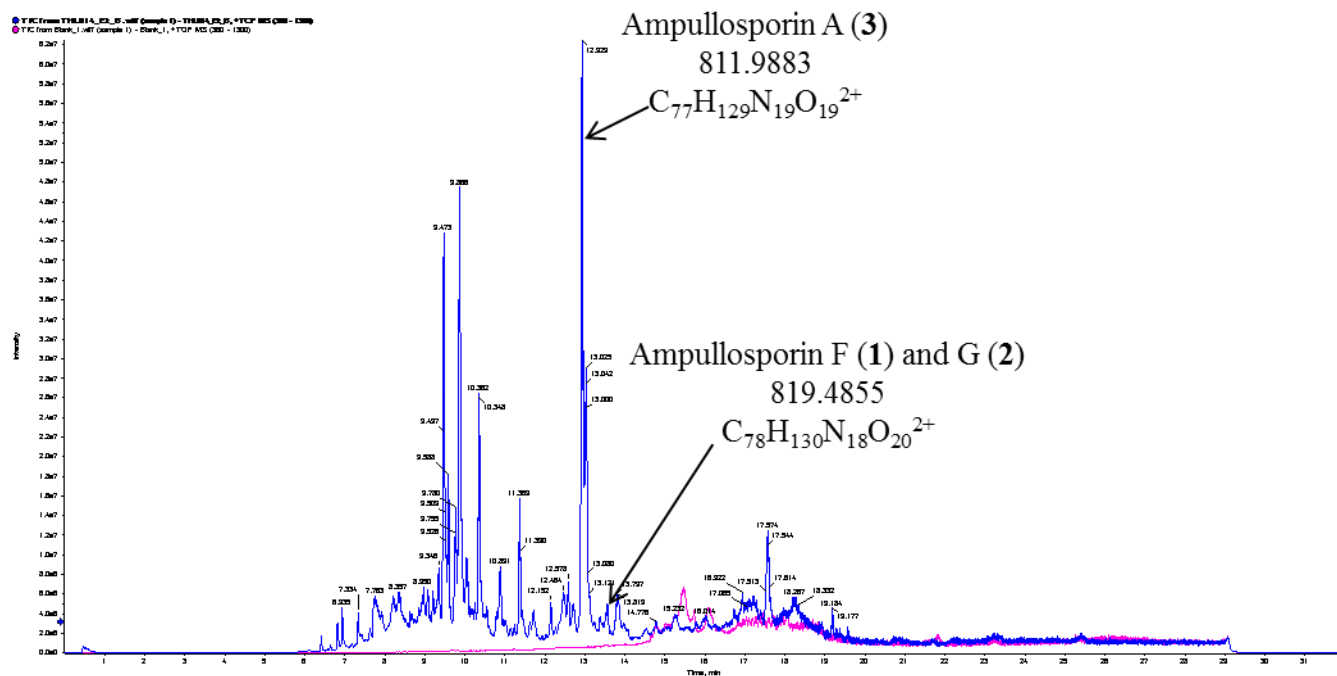

**Figure S43.** LC-HRMS spectrum of an enriched fraction (in blue) from the ethanol extract of *S. ampullosporum* strain KSH 534 and a blank sample (in pink)



**Table S1.** Positive and negative ion ESI-HRMS<sup>n</sup> data of ampullosporin F (**1**) and G (**2**).

| cpd      | (+)/(-) scan mode [ <i>m/z</i> (NCE in%)]                                 | <i>m/z</i> (fragment ion, relative intensity in %, error in ppm)                                                                                                                                                                                                                                                                                                                                                                                                                                                                                                                                                                                                                                                                                                                                                                                                                                                                                                                                                                                                                          |
|----------|---------------------------------------------------------------------------|-------------------------------------------------------------------------------------------------------------------------------------------------------------------------------------------------------------------------------------------------------------------------------------------------------------------------------------------------------------------------------------------------------------------------------------------------------------------------------------------------------------------------------------------------------------------------------------------------------------------------------------------------------------------------------------------------------------------------------------------------------------------------------------------------------------------------------------------------------------------------------------------------------------------------------------------------------------------------------------------------------------------------------------------------------------------------------------------|
| <b>1</b> | (+) full MS                                                               | 1637.9608 ([ <b>M+H</b> ] <sup>+</sup> , 14, 1.0), 819.4849 ([ <b>M+2H</b> ] <sup>2+</sup> , 100, 0.0)                                                                                                                                                                                                                                                                                                                                                                                                                                                                                                                                                                                                                                                                                                                                                                                                                                                                                                                                                                                    |
|          | (+) MS <sup>2</sup> [ <b>1638.0</b> (35)]                                 | 1619.9515 ([ <b>M+H-H<sub>2</sub>O</b> ] <sup>+</sup> , 47, 0.2), 1392.7877 ( <b>b</b> <sub>13</sub> <sup>+</sup> , 100, 0.6), 1307.7346 ( <b>b</b> <sub>12</sub> <sup>+</sup> , 21, 0.9), 1194.6510 ( <b>b</b> <sub>11</sub> <sup>+</sup> , 41, 0.6), 1051.5927 ( <b>b</b> <sub>10</sub> <sup>+</sup> , 82, 0.8), 966.5402 ( <b>b</b> <sub>9</sub> <sup>+</sup> , 39, 0.6), 881.4879 ( <b>b</b> <sub>8</sub> <sup>+</sup> , 25, 0.1), 796.4326 ( <b>b</b> <sub>7</sub> <sup>+</sup> , <1, 3.2), 668.3765 ( <b>b</b> <sub>6</sub> <sup>+</sup> , 27, 0.2), 583.3235 ( <b>b</b> <sub>5</sub> <sup>+</sup> , 7, 0.5), 470.2393 ( <b>b</b> <sub>4</sub> <sup>+</sup> , 2, 1.0)                                                                                                                                                                                                                                                                                                                                                                                                               |
|          | (+) MS <sup>2</sup> [ <b>819.5</b> (30)]                                  | 1392.7917 ( <b>b</b> <sub>13</sub> <sup>+</sup> , 8, 3.9), 1194.6517 ( <b>b</b> <sub>11</sub> <sup>+</sup> , 8, 0.0), 1168.7280 ( <b>y</b> <sub>11</sub> <sup>+</sup> , 11, 1.7), 1055.6453 ( <b>y</b> <sub>10</sub> <sup>+</sup> , 17, 0.6), 1051.5925 ( <b>b</b> <sub>10</sub> <sup>+</sup> , 35, 0.9), 970.5923 ( <b>y</b> <sub>9</sub> <sup>+</sup> , 100, 0.9), 966.5395 ( <b>b</b> <sub>9</sub> <sup>+</sup> , 38, 1.3), 881.4879 ( <b>b</b> <sub>8</sub> <sup>+</sup> , 41, 0.1), 842.5358 ( <b>y</b> <sub>8</sub> <sup>+</sup> , 3, 1.4), 757.4816 ( <b>y</b> <sub>7</sub> <sup>+</sup> , 29, 0.2), 672.4281 ( <b>y</b> <sub>6</sub> <sup>+</sup> , 25, 1.4), 668.3765 ( <b>b</b> <sub>6</sub> <sup>+</sup> , 77, 0.2), 587.3766 ( <b>y</b> <sub>5</sub> <sup>+</sup> , 19, 0.9), 583.3242 ( <b>b</b> <sub>5</sub> <sup>+</sup> , 16, 0.6), 470.2393 ( <b>b</b> <sub>4</sub> <sup>+</sup> , 17, 1.1), 444.3214 ( <b>y</b> <sub>4</sub> <sup>+</sup> , <1, 7.6), 385.1870 ( <b>b</b> <sub>3</sub> <sup>+</sup> , 6, 0.1), 300.1361 ( <b>b</b> <sub>2</sub> <sup>+</sup> , <1, 6.2) |
|          | (+) MS <sup>3</sup> [819.5 (30)→ <b>970.6</b> (25)]                       | 952.5790 ( <b>y</b> <sub>9</sub> <sup>+</sup> - <b>H<sub>2</sub>O</b> , 60, 3.8), 853.4770 ( <b>y</b> <sub>9</sub> <sup>+</sup> - <b>aa</b> ( <b>15</b> ), 72, 1.0), 725.4192 ( <b>y</b> <sub>9</sub> <sup>+</sup> - <b>aa</b> ( <b>14-15</b> ), 100, 0.0), 640.3662 ( <b>y</b> <sub>9</sub> <sup>+</sup> - <b>aa</b> ( <b>13-15</b> ), 35, 0.5), 527.2811 ( <b>y</b> <sub>9</sub> <sup>+</sup> - <b>aa</b> ( <b>12-15</b> ), 7, 2.4)                                                                                                                                                                                                                                                                                                                                                                                                                                                                                                                                                                                                                                                     |
|          | (+) MS <sup>3</sup> [819.5 (45)→ <b>470.2</b> (17)]                       | 385.1874 ( <b>b</b> <sub>3</sub> <sup>+</sup> , 100, 1.2)                                                                                                                                                                                                                                                                                                                                                                                                                                                                                                                                                                                                                                                                                                                                                                                                                                                                                                                                                                                                                                 |
|          | (+) MS <sup>4</sup> [819.5 (45)→470.2 (17)→ <b>385.2</b> (17)]            | 357.1922 ( <b>b</b> <sub>3</sub> <sup>+</sup> - <b>CO</b> , 100, 1.1), 300.1345 ( <b>b</b> <sub>2</sub> <sup>+</sup> , 86, 0.6)                                                                                                                                                                                                                                                                                                                                                                                                                                                                                                                                                                                                                                                                                                                                                                                                                                                                                                                                                           |
|          | (+) MS <sup>5</sup> [819.5 (45)→470.2 (17)→385.2 (17)→ <b>300.1</b> (23)] | 229.0977 ( <b>b</b> <sub>1</sub> <sup>+</sup> , 100, 1.3)                                                                                                                                                                                                                                                                                                                                                                                                                                                                                                                                                                                                                                                                                                                                                                                                                                                                                                                                                                                                                                 |
| <b>1</b> | (-) full MS                                                               | 1681.9465 ([ <b>M-H-HCOOH</b> ] <sup>-</sup> , 21, 3.5), 1635.9458 ([ <b>M-H</b> ] <sup>-</sup> , 100, 1.2), 817.4680 ([ <b>M-2H</b> ] <sup>2-</sup> , 11, 2.5)                                                                                                                                                                                                                                                                                                                                                                                                                                                                                                                                                                                                                                                                                                                                                                                                                                                                                                                           |
|          | (-) MS <sup>2</sup> [ <b>1635.9</b> (35)]                                 | 1617.9349 ([ <b>M-H-H<sub>2</sub>O</b> ] <sup>-</sup> , 6, 1.5), 1407.8525 ( <b>y</b> <sub>14</sub> <sup>-</sup> , 4, 3.9), 1390.7782 ( <b>b</b> <sub>13</sub> <sup>-</sup> , <1, 3.0), 1336.8179 ( <b>y</b> <sub>13</sub> <sup>-</sup> , 3, 3.0), 1251.7668 ( <b>y</b> <sub>12</sub> <sup>-</sup> , 4, 1.1), 1166.7102 ( <b>y</b> <sub>11</sub> <sup>-</sup> , 3, 4.6), 1053.6372 ( <b>y</b> <sub>10</sub> <sup>-</sup> , 1, 4.1), 1049.5755 ( <b>b</b> <sub>10</sub> <sup>-</sup> , 100, 3.3), 968.5731 ( <b>y</b> <sub>9</sub> <sup>-</sup> , <1, 5.7), 964.5287 ( <b>b</b> <sub>9</sub> <sup>-</sup> , <1, 2.6), 936.5289 ( <b>b</b> <sub>9</sub> <sup>-</sup> - <b>CO</b> , 66, 2.5), 879.4720 ( <b>b</b> <sub>8</sub> <sup>-</sup> , <1, 1.6), 794.4152 ( <b>b</b> <sub>7</sub> <sup>-</sup> , <1, 6.9), 666.3598 ( <b>b</b> <sub>6</sub> <sup>-</sup> , 2, 3.5), 553.3342 ( <b>y</b> <sub>5</sub> <sup>-</sup> - <b>CH<sub>3</sub>OH</b> , 42, 2.4)                                                                                                                                |
| <b>2</b> | (+) full MS                                                               | 1637.9625 ([ <b>M+H</b> ] <sup>+</sup> , 15, 0.0), 819.4860 ([ <b>M+2H</b> ] <sup>2+</sup> , 100, 1.4)                                                                                                                                                                                                                                                                                                                                                                                                                                                                                                                                                                                                                                                                                                                                                                                                                                                                                                                                                                                    |
|          | (+) MS <sup>2</sup> [ <b>1638.0</b> (35)]                                 | 1619.9508 ([ <b>M+H-H<sub>2</sub>O</b> ] <sup>+</sup> , 55, 0.7), 1392.7875 ( <b>b</b> <sub>13</sub> <sup>+</sup> , 67, 0.8), 1307.7357 ( <b>b</b> <sub>12</sub> <sup>+</sup> , 27, 0.1), 1194.6440 ( <b>b</b> <sub>11</sub> <sup>+</sup> , <1, 6.4), 1066.5923 ( <b>b</b> <sub>10</sub> <sup>+</sup> , 100, 0.8), 981.5396 ( <b>b</b> <sub>9</sub> <sup>+</sup> , 50, 0.8), 896.4871 ( <b>b</b> <sub>8</sub> <sup>+</sup> , 32, 0.6), 811.4340 ( <b>b</b> <sub>7</sub> <sup>+</sup> , <1, 1.0), 668.3763 ( <b>b</b> <sub>6</sub> <sup>+</sup> , 29, 0.4), 583.3235 ( <b>b</b> <sub>5</sub> <sup>+</sup> , 10, 0.6), 470.2400 ( <b>b</b> <sub>4</sub> <sup>+</sup> , 3, 0.4)                                                                                                                                                                                                                                                                                                                                                                                                              |
|          | (+) MS <sup>2</sup> [ <b>819.5</b> (30)]                                  | 1520.8486 ( <b>b</b> <sub>14</sub> <sup>+</sup> , 2, 3.9), 1392.7886 ( <b>b</b> <sub>13</sub> <sup>+</sup> , 39, 0.1), 1307.7392 ( <b>b</b> <sub>12</sub> <sup>+</sup> , 2, 2.6), 1194.6516 ( <b>b</b> <sub>11</sub> <sup>+</sup> , 5, 0.1), 1168.7295 ( <b>y</b> <sub>11</sub> <sup>+</sup> , 8, 0.4), 1066.5919 ( <b>b</b> <sub>10</sub> <sup>+</sup> , 82, 1.2),                                                                                                                                                                                                                                                                                                                                                                                                                                                                                                                                                                                                                                                                                                                       |

|                                                                             |                                            |                                                                                                                                                                                                                                                                                                                                                                                                                                                                                                                                                                                                                                                                                                                                                                                                                                                                                                                                                                                                                                                                                 |
|-----------------------------------------------------------------------------|--------------------------------------------|---------------------------------------------------------------------------------------------------------------------------------------------------------------------------------------------------------------------------------------------------------------------------------------------------------------------------------------------------------------------------------------------------------------------------------------------------------------------------------------------------------------------------------------------------------------------------------------------------------------------------------------------------------------------------------------------------------------------------------------------------------------------------------------------------------------------------------------------------------------------------------------------------------------------------------------------------------------------------------------------------------------------------------------------------------------------------------|
|                                                                             |                                            | 1055.6425 ( <b>y</b> <sub>10</sub> <sup>+</sup> , 14, 3.2), 981.5388 ( <b>b</b> <sub>9</sub> <sup>+</sup> , 88, 1.6), 970.5915 ( <b>y</b> <sub>9</sub> <sup>+</sup> , 100, 1.7), 896.4869 ( <b>b</b> <sub>8</sub> <sup>+</sup> , 79, 0.8), 827.5331 ( <b>y</b> <sub>8</sub> <sup>+</sup> , 2, 2.2), 742.4813 ( <b>y</b> <sub>7</sub> <sup>+</sup> , 52, 1.1), 668.3763 ( <b>b</b> <sub>6</sub> <sup>+</sup> , 91, 0.5), 657.4290 ( <b>y</b> <sub>6</sub> <sup>+</sup> , 62, 0.8), 583.3232 ( <b>b</b> <sub>5</sub> <sup>+</sup> , 18, 1.2), 572.3767 ( <b>y</b> <sub>5</sub> <sup>+</sup> , 44, 0.1), 470.2396 ( <b>b</b> <sub>4</sub> <sup>+</sup> , 17, 0.4), 444.3169 ( <b>y</b> <sub>4</sub> <sup>+</sup> , 4, 2.7), 385.1872 ( <b>b</b> <sub>3</sub> <sup>+</sup> , 6, 0.4), 300.1368 ( <b>b</b> <sub>2</sub> <sup>+</sup> , 1, 8.5), 246.1820 ( <b>y</b> <sub>2</sub> <sup>+</sup> , 2, 3.3)                                                                                                                                                                              |
| (+) MS <sup>3</sup> [819.5 (30)→ <b>970.6 (25)</b> ]                        |                                            | 952.5803 ( <b>y</b> <sub>9</sub> <sup>+</sup> - <b>H<sub>2</sub>O</b> , 56, 2.4), 853.4765 ( <b>y</b> <sub>9</sub> <sup>+</sup> - <b>aa(15)</b> , 77, 1.5), 725.4192 ( <b>y</b> <sub>9</sub> <sup>+</sup> - <b>aa(14-15)</b> , 100, 0.0), 640.3657 ( <b>y</b> <sub>9</sub> <sup>+</sup> - <b>aa(13-15)</b> , 34, 1.2), 527.2846 ( <b>y</b> <sub>9</sub> <sup>+</sup> - <b>aa(12-15)</b> , 9, 4.1), 399.2275 ( <b>y</b> <sub>9</sub> <sup>+</sup> - <b>aa(11-15)</b> , <1, 9.3)                                                                                                                                                                                                                                                                                                                                                                                                                                                                                                                                                                                                  |
| (+) MS <sup>3</sup> [819.5 (45)→ <b>470.2 (17)</b> ]                        |                                            | 385.1872 ( <b>b</b> <sub>3</sub> <sup>+</sup> , 100, 0.4)                                                                                                                                                                                                                                                                                                                                                                                                                                                                                                                                                                                                                                                                                                                                                                                                                                                                                                                                                                                                                       |
| (+) MS <sup>4</sup> [819.5 (45)→470.2 (17) → <b>385.2 (17)</b> ]            |                                            | 357.1922 ( <b>b</b> <sub>3</sub> <sup>+</sup> - <b>CO</b> , 100, 0.6), 300.1342 ( <b>b</b> <sub>2</sub> <sup>+</sup> , 90, 0.3)                                                                                                                                                                                                                                                                                                                                                                                                                                                                                                                                                                                                                                                                                                                                                                                                                                                                                                                                                 |
| (+) MS <sup>5</sup> [819.5 (45)→470.2 (17) →385.2 (17)→ <b>300.1 (23)</b> ] |                                            | 229.0977 ( <b>b</b> <sub>1</sub> <sup>+</sup> , 100, 2.6)                                                                                                                                                                                                                                                                                                                                                                                                                                                                                                                                                                                                                                                                                                                                                                                                                                                                                                                                                                                                                       |
| <hr/>                                                                       |                                            |                                                                                                                                                                                                                                                                                                                                                                                                                                                                                                                                                                                                                                                                                                                                                                                                                                                                                                                                                                                                                                                                                 |
| <b>2</b>                                                                    | (-) full MS                                | 1681.9472 ( <b>[M-H+HCOOH]</b> , 20, 3.7), 1635.9453 ( <b>[M-H]</b> , 100, 1.6), 817.4681 ( <b>[M-2H]</b> <sup>2-</sup> , 7, 2.7)                                                                                                                                                                                                                                                                                                                                                                                                                                                                                                                                                                                                                                                                                                                                                                                                                                                                                                                                               |
|                                                                             | (-) MS <sup>2</sup> [ <b>1635.9 (35)</b> ] | 1617.9287 ( <b>[M-H-H<sub>2</sub>O]</b> , <1, 5.4), 1407.8543 ( <b>y</b> <sub>14</sub> <sup>-</sup> , <1, 2.7), 1390.7803 ( <b>b</b> <sub>13</sub> <sup>-</sup> , <1, 4.5), 1336.8093 ( <b>y</b> <sub>13</sub> <sup>-</sup> , <1, 8.7), 1251.7572 ( <b>y</b> <sub>12</sub> <sup>-</sup> , <1, 8.8), 1192.6478 ( <b>b</b> <sub>11</sub> <sup>-</sup> , <1, 8.9), 1166.7143 ( <b>y</b> <sub>11</sub> <sup>-</sup> , 3, 1.0), 1064.5835 ( <b>b</b> <sub>10</sub> <sup>-</sup> , <1, 8.9), 1053.6284 ( <b>y</b> <sub>10</sub> <sup>-</sup> , 1, 2.8), 968.5767 ( <b>y</b> <sub>9</sub> <sup>-</sup> , <1, 1.3), 936.5499 ( <b>y</b> <sub>9</sub> <sup>-</sup> - <b>CH<sub>3</sub>OH</b> , 100, 2.7), 825.5215 ( <b>y</b> <sub>8</sub> <sup>-</sup> , <1, 1.4), 740.4655 ( <b>y</b> <sub>7</sub> <sup>-</sup> , 3, 2.9), 666.3651 ( <b>b</b> <sub>6</sub> <sup>-</sup> , <1, 4.5), 655.4136 ( <b>y</b> <sub>6</sub> <sup>-</sup> , 3, 1.8), 570.3615 ( <b>y</b> <sub>5</sub> <sup>-</sup> , 2, 1.1), 553.3342 ( <b>y</b> <sub>5</sub> <sup>-</sup> - <b>NH<sub>3</sub></b> , 3, 2.4) |
| <hr/>                                                                       |                                            |                                                                                                                                                                                                                                                                                                                                                                                                                                                                                                                                                                                                                                                                                                                                                                                                                                                                                                                                                                                                                                                                                 |

**Table S2.** Positive ion ESI-HRMS<sup>n</sup> data of ampullosporin A (3), peptaibolin (4) and chrysosporide G (5).

| cpd | (+)/(−) scan mode [ <i>m/z</i> (NCE in%)] | <i>m/z</i> (fragment ion, relative intensity in %, error in ppm)                                                                                                                                                                                                                                                                                                                                                                                                                                                                                                                                                                                                                                                                                                                                                                                                                                                                                                                                                                                                                                                                                                                                                                                                                                                                                                                                                       |
|-----|-------------------------------------------|------------------------------------------------------------------------------------------------------------------------------------------------------------------------------------------------------------------------------------------------------------------------------------------------------------------------------------------------------------------------------------------------------------------------------------------------------------------------------------------------------------------------------------------------------------------------------------------------------------------------------------------------------------------------------------------------------------------------------------------------------------------------------------------------------------------------------------------------------------------------------------------------------------------------------------------------------------------------------------------------------------------------------------------------------------------------------------------------------------------------------------------------------------------------------------------------------------------------------------------------------------------------------------------------------------------------------------------------------------------------------------------------------------------------|
| 3   | (+) full MS                               | 1622.9628 ([ <b>M+H</b> ] <sup>+</sup> , 52, 0.0), 811.9851 ([ <b>M+2H</b> ] <sup>2+</sup> , 100, 0.1)                                                                                                                                                                                                                                                                                                                                                                                                                                                                                                                                                                                                                                                                                                                                                                                                                                                                                                                                                                                                                                                                                                                                                                                                                                                                                                                 |
|     | (+) MS <sup>2</sup> [1623.0 (45)]         | 1604.9509 ([ <b>M+H-H<sub>2</sub>O</b> ] <sup>+</sup> , 94, 0.8), 1377.7959 ( <b>b</b> <sub>13</sub> <sup>+</sup> , 15, 5.1), 1292.7404 ( <b>b</b> <sub>12</sub> <sup>+</sup> , 29, 3.3), 1051.5931 ( <b>b</b> <sub>10</sub> <sup>+</sup> , 51, 0.3), 966.5410 ( <b>b</b> <sub>9</sub> <sup>+</sup> , 45, 0.2), 881.4872 ( <b>b</b> <sub>8</sub> <sup>+</sup> , 56, 0.9), 668.3757 ( <b>b</b> <sub>6</sub> <sup>+</sup> , 100, 1.4), 583.3231 ( <b>b</b> <sub>5</sub> <sup>+</sup> , 34, 1.3), 470.2400 ( <b>b</b> <sub>4</sub> <sup>+</sup> , 16, 0.5)                                                                                                                                                                                                                                                                                                                                                                                                                                                                                                                                                                                                                                                                                                                                                                                                                                                                |
|     | (+) MS <sup>2</sup> [812.0 (45)]          | 1377.7928 ( <b>b</b> <sub>13</sub> <sup>+</sup> , 16, 2.9), 1292.7458 ( <b>b</b> <sub>12</sub> <sup>+</sup> , 1, 7.5), 1153.7329 ( <b>y</b> <sub>11</sub> <sup>+</sup> , 8, 2.2), 1051.5951 ( <b>b</b> <sub>10</sub> <sup>+</sup> , 39, 1.5), 1040.6482 ( <b>y</b> <sub>10</sub> <sup>+</sup> , 13, 1.9), 966.5419 ( <b>b</b> <sub>9</sub> <sup>+</sup> , 36, 1.2), 955.5953 ( <b>y</b> <sub>9</sub> <sup>+</sup> , 83, 1.9), 881.4892 ( <b>b</b> <sub>8</sub> <sup>+</sup> , 36, 1.4), 742.4830 ( <b>y</b> <sub>7</sub> <sup>+</sup> , 34, 1.1), 668.3775 ( <b>b</b> <sub>6</sub> <sup>+</sup> , 100, 1.3), 657.4302 ( <b>y</b> <sub>6</sub> <sup>+</sup> , 25, 1.3), 583.3246 ( <b>b</b> <sub>5</sub> <sup>+</sup> , 42, 1.2), 572.3776 ( <b>y</b> <sub>5</sub> <sup>+</sup> , 24, 1.7), 470.2406 ( <b>b</b> <sub>4</sub> <sup>+</sup> , 46, 1.6), 444.3177 ( <b>y</b> <sub>4</sub> <sup>+</sup> , 4, 0.9), 385.1878 ( <b>b</b> <sub>3</sub> <sup>+</sup> , 21, 2.0), 331.2343 ( <b>y</b> <sub>3</sub> <sup>+</sup> , <1, 1.0), 300.1360 ( <b>b</b> <sub>2</sub> <sup>+</sup> , 3, 5.6), 246.1816 ( <b>y</b> <sub>2</sub> <sup>+</sup> , 2, 1.7), 229.0992 ( <b>b</b> <sub>1</sub> <sup>+</sup> , <1, 9.1)                                                                                                                                                                                                           |
| 4   | (+) full MS                               | 590.3892 ([ <b>M+H</b> ] <sup>+</sup> , 100, 3.4)                                                                                                                                                                                                                                                                                                                                                                                                                                                                                                                                                                                                                                                                                                                                                                                                                                                                                                                                                                                                                                                                                                                                                                                                                                                                                                                                                                      |
|     | (+) MS <sup>2</sup> [590.4 (35)]          | 572.3789 ([ <b>M+H-H<sub>2</sub>O</b> ] <sup>+</sup> , 27, 3.1), 439.2899 ( <b>b</b> <sub>4</sub> <sup>+</sup> , 100, 3.5), 354.2377 ( <b>b</b> <sub>3</sub> <sup>+</sup> , 18, 2.8), 241.1542 ( <b>b</b> <sub>2</sub> <sup>+</sup> , 4, 2.1)                                                                                                                                                                                                                                                                                                                                                                                                                                                                                                                                                                                                                                                                                                                                                                                                                                                                                                                                                                                                                                                                                                                                                                          |
| 5   | (+) full MS                               | 510.3649 ([ <b>M+H</b> ] <sup>+</sup> , 100, 0.2), 532.3468 ([ <b>M+Na</b> ] <sup>+</sup> , 28, 0.2)                                                                                                                                                                                                                                                                                                                                                                                                                                                                                                                                                                                                                                                                                                                                                                                                                                                                                                                                                                                                                                                                                                                                                                                                                                                                                                                   |
|     | (+) MS <sup>2</sup> [510.4 (35)]          | 492.3546 ([ <b>M+H-H<sub>2</sub>O</b> ] <sup>+</sup> , 10, 0.3), 482.3700 ([ <b>M+H-CO</b> ] <sup>+</sup> , 90, 0.2), 465.3435 ([ <b>M+H-CO-NH<sub>3</sub></b> ] <sup>+</sup> , 43, 0.2), 411.2961 ( <b>b</b> <sub>4AV</sub> , 85, 1.1), 397.2806 ( <b>b</b> <sub>4LL</sub> / <b>b</b> <sub>4LL</sub> <sup>*</sup> / <b>b</b> <sub>4VL</sub> , 100, 0.8), 383.3018 ( <b>a</b> <sub>4AV</sub> , 12, 0.4), 369.2861 ( <b>a</b> <sub>4LL</sub> / <b>a</b> <sub>4LL</sub> <sup>*</sup> / <b>a</b> <sub>4VL</sub> , 26, 0.3), 366.2754 ([ <b>a</b> <sub>4AV</sub> - <b>NH<sub>3</sub></b> ] <sup>+</sup> , 4, 0.8), 352.2596 ([ <b>a</b> <sub>4LL</sub> / <b>a</b> <sub>4LL</sub> <sup>*</sup> / <b>a</b> <sub>4VL</sub> - <b>NH<sub>3</sub></b> ] <sup>+</sup> , 9, 0.5), 340.2596 ( <b>b</b> <sub>3LA</sub> , 2, 0.5), 326.2433 ( <b>b</b> <sub>3LL</sub> , 4, 1.5), 298.2127 ( <b>b</b> <sub>3AV</sub> , 23, 0.6), 284.1970 ( <b>b</b> <sub>3LL</sub> <sup>*</sup> / <b>b</b> <sub>3VL</sub> , 18, 0.5), 227.1757 ( <b>b</b> <sub>2LA</sub> / <b>b</b> <sub>2LL</sub> , 3, 1.5), 213.1600 ( <b>b</b> <sub>2LL</sub> <sup>*</sup> , 1, 1.3), 199.1807 ( <b>a</b> <sub>2LL</sub> / <b>a</b> <sub>2LA</sub> , 2, 1.1), 185.1647 ( <b>a</b> <sub>2LL</sub> <sup>*</sup> , 1, 1.0), 185.1286 ( <b>b</b> <sub>2AV</sub> , 1, 0.9), 171.1125 ( <b>b</b> <sub>2VL</sub> , <1, 1.7), 157.1337 ( <b>a</b> <sub>2AV</sub> , 1, 0.8) |

|   |   |    |  |                             |  |                             |  |                             |  |                             |
|---|---|----|--|-----------------------------|--|-----------------------------|--|-----------------------------|--|-----------------------------|
| 1 | → | HA |  | L                           |  | L                           |  | L                           |  | V <sup>+</sup>              |
|   |   |    |  | <sup>b<sub>1AV</sub>+</sup> |  | <sup>b<sub>2AV</sub>+</sup> |  | <sup>b<sub>3AV</sub>+</sup> |  | <sup>b<sub>4AV</sub>+</sup> |
| 2 | → | HL |  | L                           |  | L                           |  | V                           |  | A <sup>+</sup>              |
|   |   |    |  | <sup>b<sub>1LA</sub>+</sup> |  | <sup>b<sub>2LA</sub>+</sup> |  | <sup>b<sub>3LA</sub>+</sup> |  | <sup>b<sub>4LA</sub>+</sup> |
| 3 | → | HL |  | L                           |  | V                           |  | A                           |  | L <sup>+</sup>              |
|   |   |    |  | <sup>b<sub>1LL</sub>+</sup> |  | <sup>b<sub>2LL</sub>+</sup> |  | <sup>b<sub>3LL</sub>+</sup> |  | <sup>b<sub>4LL</sub>+</sup> |
| 4 | → | HL |  | V                           |  | A                           |  | L                           |  | L <sup>+</sup>              |
|   |   |    |  | <sup>b<sub>1LL</sub>+</sup> |  | <sup>b<sub>2LL</sub>+</sup> |  | <sup>b<sub>3LL</sub>+</sup> |  | <sup>b<sub>4LL</sub>+</sup> |
| 5 | → | HV |  | A                           |  | L                           |  | L                           |  | L <sup>+</sup>              |
|   |   |    |  | <sup>b<sub>1VL</sub>+</sup> |  | <sup>b<sub>2VL</sub>+</sup> |  | <sup>b<sub>3VL</sub>+</sup> |  | <sup>b<sub>4VL</sub>+</sup> |
